# Supplementary material
Source: Elsevier journal article supplement (https://www.sciencedirect.com/science/article/pii/S2530064420300614)
Supplement: mmc1 [file S2530064420300614:mmc1.xlsx]

## Sheet: Table S1
Table S1. The 46,557 vertebrate species and respective data obtained from the IUCN Red List database.
Internal taxon ID	Class	Order	Family	Genus	Species	Red List threat category	Systems	Habitats list	Threats list	Threats
1078	ACTINOPTERYGII	PERCIFORMES	CENTRARCHIDAE	Ambloplites	cavifrons	Least Concern	Freshwater (=Inland waters)	[{'habitat': 'Wetlands (inland) - Permanent Rivers/Streams/Creeks (includes waterfalls)', 'code': '5.1', 'season': None, 'suitability': 'Suitable', 'majorimportance': 'Yes'}]	[{'code': '7.2', 'score': 'Low Impact: 5', 'severity': None, 'timing': 'Ongoing', 'title': 'Dams & water management/use', 'invasive': None, 'scope': 'Majority (50-90%)'}, {'code': '7.2.11', 'score': 'Low Impact: 5', 'severity': None, 'timing': 'Ongoing', 'title': 'Dams (size unknown)', 'invasive': None, 'scope': 'Majority (50-90%)'}, {'code': '8.1', 'score': 'Low Impact: 5', 'severity': None, 'ti…	Decline of this species is attributed to impoundment, pollution, competition with introduced populations of rock bass (<em>A. rupestris</em>), and adverse spring stream conditions in certain years (Petrimoulx 1983). Burkhead and Jenkins (1991) identified siltation as the probable cause of decline, together with competition and introgressive hybridization with the introduced rock bass in the upper…
11060	ACTINOPTERYGII	PERCIFORMES	KUHLIIDAE	Kuhlia	marginata	Least Concern	Freshwater (=Inland waters)|Marine	[{'habitat': 'Wetlands (inland) - Permanent Rivers/Streams/Creeks (includes waterfalls)', 'code': '5.1', 'season': None, 'suitability': 'Suitable', 'majorimportance': 'Yes'}, {'habitat': 'Marine Neritic - Estuaries', 'code': '9.10', 'season': None, 'suitability': 'Suitable', 'majorimportance': 'Yes'}]	[]	There are currently no known major threats impacting this species.
11150	ACTINOPTERYGII	TETRAODONTIFORMES	TETRAODONTIDAE	Lagocephalus	gloveri	Data Deficient	Marine	[{'habitat': 'Marine Neritic - Estuaries', 'code': '9.10', 'season': None, 'suitability': 'Suitable', 'majorimportance': None}, {'habitat': 'Marine Neritic - Subtidal Sandy', 'code': '9.4', 'season': None, 'suitability': 'Suitable', 'majorimportance': None}, {'habitat': 'Marine Neritic - Subtidal Sandy-Mud', 'code': '9.5', 'season': None, 'suitability': 'Suitable', 'majorimportance': None}, {'hab…	[{'code': '1.1', 'score': 'Unknown', 'severity': 'Unknown', 'timing': 'Ongoing', 'title': 'Housing & urban areas', 'invasive': None, 'scope': 'Unknown'}, {'code': '11.1', 'score': 'Unknown', 'severity': 'Unknown', 'timing': 'Ongoing', 'title': 'Habitat shifting & alteration', 'invasive': None, 'scope': 'Unknown'}, {'code': '11.3', 'score': 'Unknown', 'severity': 'Unknown', 'timing': 'Ongoing', 't…	<strong>Pufferfish fishery<br/></strong><span style="font-style: italic;">Lagocephalus gloveri</span> is impacted by pufferfish fisheries in parts of its range. In Japan, Pufferfish landings have declined since the early 1990s. Concern about the fishery centers on the most valuable and preferred species, <em>Takifugu rubripes</em>,&#160;which, as of 2010, was considered depleted in Japan.<em> </e…
12137	ACTINOPTERYGII	PERCIFORMES	SPARIDAE	Lithognathus	lithognathus	Endangered	Marine	[{'habitat': 'Marine Neritic - Estuaries', 'code': '9.10', 'season': 'unknown', 'suitability': 'Suitable', 'majorimportance': 'Yes'}, {'habitat': 'Marine Neritic - Subtidal Loose Rock/pebble/gravel', 'code': '9.3', 'season': 'unknown', 'suitability': 'Suitable', 'majorimportance': 'Yes'}, {'habitat': 'Marine Neritic - Subtidal Sandy', 'code': '9.4', 'season': 'unknown', 'suitability': 'Suitable',…	[{'code': '11.2', 'score': 'Unknown', 'severity': 'Unknown', 'timing': 'Future', 'title': 'Droughts', 'invasive': None, 'scope': 'Unknown'}, {'code': '11.3', 'score': 'Unknown', 'severity': 'Unknown', 'timing': 'Future', 'title': 'Temperature extremes', 'invasive': None, 'scope': 'Unknown'}, {'code': '5.4', 'score': 'Unknown', 'severity': 'Unknown', 'timing': 'Ongoing', 'title': 'Fishing & harves…	<em>Lithognathus lithognathus</em> is threatened by over-fishing, climate change and habitat loss and degradation (Bennett 1993, Whitfield 1997, Bennett <em>et al.</em>&#160;2011). Adults undertake a predictable annual spawning migration, aggregating at certain points where they are targeted heavily by recreational shore anglers. The very narrow spawning habitats of <em>L. lithognathus&#160;</em>…
12416	ACTINOPTERYGII	PERCIFORMES	LUTJANIDAE	Lutjanus	analis	Near Threatened	Marine	[{'habitat': 'Marine Neritic - Subtidal Rock and Rocky Reefs', 'code': '9.2', 'season': 'resident', 'suitability': 'Suitable', 'majorimportance': None}, {'habitat': 'Marine Neritic - Seagrass (Submerged)', 'code': '9.9', 'season': 'resident', 'suitability': 'Suitable', 'majorimportance': None}]	[{'code': '1.1', 'score': 'Unknown', 'severity': 'Unknown', 'timing': 'Ongoing', 'title': 'Housing & urban areas', 'invasive': None, 'scope': 'Unknown'}, {'code': '1.2', 'score': 'Unknown', 'severity': 'Unknown', 'timing': 'Ongoing', 'title': 'Commercial & industrial areas', 'invasive': None, 'scope': 'Unknown'}, {'code': '1.3', 'score': 'Unknown', 'severity': 'Unknown', 'timing': 'Ongoing', 'tit…	This valuable species is caught with hook and line, seines, gill nets, bottom longlines, traps and spears by divers (Allen 1985). Spawning aggregations are targeted by fishers throughout its range. This species is prized by recreational anglers along Florida's east coast where the majority of landings occur from Cape Canaveral, Florida, through the Florida Keys. The species is popular with spearf…
12417	ACTINOPTERYGII	PERCIFORMES	LUTJANIDAE	Lutjanus	cyanopterus	Vulnerable	Marine	[{'habitat': 'Marine Intertidal - Mangrove Submerged Roots', 'code': '12.7', 'season': 'resident', 'suitability': 'Suitable', 'majorimportance': None}, {'habitat': 'Marine Neritic - Subtidal Rock and Rocky Reefs', 'code': '9.2', 'season': 'resident', 'suitability': 'Suitable', 'majorimportance': None}]	[{'code': '1.1', 'score': 'Unknown', 'severity': 'Unknown', 'timing': 'Ongoing', 'title': 'Housing & urban areas', 'invasive': None, 'scope': 'Unknown'}, {'code': '11.3', 'score': 'Unknown', 'severity': 'Unknown', 'timing': 'Ongoing', 'title': 'Temperature extremes', 'invasive': None, 'scope': 'Unknown'}, {'code': '11.4', 'score': 'Unknown', 'severity': 'Unknown', 'timing': 'Ongoing', 'title': 'S…	<em>Lutjanus cyanopterus</em> populations that are not ciguatoxic are harvested by subsistence, commercial and recreational fisheries depending on the region. Spawning aggregations have been targeted by fishers in areas without ciguatoxic populations resulting in probable reductions in population numbers over decades based on fisher or fishery department communications from several greater Caribb…
13145	ACTINOPTERYGII	ATHERINIFORMES	ATHERINOPSIDAE	Menidia	conchorum	Endangered	Marine	[{'habitat': 'Marine Intertidal - Tidepools', 'code': '12.6', 'season': 'resident', 'suitability': 'Suitable', 'majorimportance': None}, {'habitat': 'Marine Coastal/Supratidal - Coastal Brackish/Saline Lagoons/Marine Lakes', 'code': '13.4', 'season': 'resident', 'suitability': 'Suitable', 'majorimportance': None}, {'habitat': 'Marine Neritic - Pelagic', 'code': '9.1', 'season': None, 'suitability…	[{'code': '1.1', 'score': 'Unknown', 'severity': 'Unknown', 'timing': 'Ongoing', 'title': 'Housing & urban areas', 'invasive': None, 'scope': 'Unknown'}, {'code': '11.1', 'score': 'Unknown', 'severity': 'Unknown', 'timing': 'Ongoing', 'title': 'Habitat shifting & alteration', 'invasive': None, 'scope': 'Unknown'}, {'code': '1.2', 'score': 'Unknown', 'severity': 'Unknown', 'timing': 'Ongoing', 'ti…	Key Silverside is threatened by habitat loss throughout its range. Coastal development activity has reduced a number of sites especially ponds and formerly occupied areas (Gilbert 1978, Getter 1981, Florida Fish and Wildlife Conservation Commission 2011). It may be susceptible to impacts from sea level rise (Reece<em> et al. </em>2013).
14505	ACTINOPTERYGII	OSMERIFORMES	GALAXIIDAE	Neochanna	burrowsius	Critically Endangered	Freshwater (=Inland waters)	[{'habitat': 'Artificial/Aquatic - Irrigated Land (includes irrigation channels)', 'code': '15.7', 'season': None, 'suitability': 'Suitable', 'majorimportance': 'Yes'}, {'habitat': 'Artificial/Aquatic - Canals and Drainage Channels, Ditches', 'code': '15.9', 'season': None, 'suitability': 'Suitable', 'majorimportance': 'Yes'}, {'habitat': 'Wetlands (inland) - Permanent Rivers/Streams/Creeks (incl…	[{'code': '2.3', 'score': 'Medium Impact: 7', 'severity': 'Slow, Significant Declines', 'timing': 'Ongoing', 'title': 'Livestock farming & ranching', 'invasive': None, 'scope': 'Whole (>90%)'}, {'code': '2.3.2', 'score': 'Medium Impact: 7', 'severity': 'Slow, Significant Declines', 'timing': 'Ongoing', 'title': 'Small-holder grazing, ranching or farming', 'invasive': None, 'scope': 'Whole (>90%)'…	This species is amongst New Zealand's most threatened freshwater fishes owing to very extensive loss of wetland habitats throughout the Canterbury Plains. The principal causes of habitat loss are ongoing water abstraction, agricultural development and intensification and change in irrigation methods from border dyke to pumped spray irrigation. Sub-populations in permanently flowing waters through…
14506	ACTINOPTERYGII	OSMERIFORMES	GALAXIIDAE	Neochanna	diversus	Endangered	Freshwater (=Inland waters)	[{'habitat': 'Wetlands (inland) - Bogs, Marshes, Swamps, Fens, Peatlands', 'code': '5.4', 'season': None, 'suitability': 'Suitable', 'majorimportance': 'Yes'}, {'habitat': 'Wetlands (inland) - Seasonal/Intermittent Freshwater Marshes/Pools (under 8ha)', 'code': '5.8', 'season': None, 'suitability': 'Suitable', 'majorimportance': 'Yes'}]	[{'code': '7.1', 'score': 'Unknown', 'severity': 'Unknown', 'timing': 'Ongoing', 'title': 'Fire & fire suppression', 'invasive': None, 'scope': 'Minority (<50%)'}, {'code': '7.1.1', 'score': 'Unknown', 'severity': 'Unknown', 'timing': 'Ongoing', 'title': 'Increase in fire frequency/intensity', 'invasive': None, 'scope': 'Minority (<50%)'}, {'code': '7.2', 'score': 'Medium Impact: 7', 'severity': …	This species is sensitive to a wide range of environmental impacts such as habitat loss, pollution and sedimentation. Wetland drainage is the most significant threat to this species, however the rate of habitat loss has slowed compared to that of historic levels as not much wetland habitat remains. It is also threatened by the presence of Mosquito Fish (<em>Gambusia affinis</em>), an aggressive a…
14507	ACTINOPTERYGII	OSMERIFORMES	GALAXIIDAE	Neochanna	apoda	Endangered	Freshwater (=Inland waters)	[{'habitat': 'Wetlands (inland) - Shrub Dominated Wetlands', 'code': '5.3', 'season': None, 'suitability': 'Suitable', 'majorimportance': 'Yes'}, {'habitat': 'Wetlands (inland) - Bogs, Marshes, Swamps, Fens, Peatlands', 'code': '5.4', 'season': None, 'suitability': 'Suitable', 'majorimportance': 'Yes'}, {'habitat': 'Wetlands (inland) - Seasonal/Intermittent Freshwater Marshes/Pools (under 8ha)', …	[{'code': '1.1', 'score': 'Medium Impact: 6', 'severity': 'Slow, Significant Declines', 'timing': 'Ongoing', 'title': 'Housing & urban areas', 'invasive': None, 'scope': 'Majority (50-90%)'}, {'code': '7.2', 'score': 'Medium Impact: 6', 'severity': 'Slow, Significant Declines', 'timing': 'Ongoing', 'title': 'Dams & water management/use', 'invasive': None, 'scope': 'Majority (50-90%)'}, {'code': '…	All mainland mudfish species are threatened by the loss of approximately 85-90% of New Zealand's wetlands (Ministry for the Environment 1997). Loss and degradation of habitat through activities such as drainage schemes, irrigation and land development are the biggest agents of decline for these species (Department of Conservation 2003). As a result, there are now extensive areas of countryside wh…
154656	ACTINOPTERYGII	PERCIFORMES	MICRODESMIDAE	Parioglossus	neocaledonicus	Data Deficient	Freshwater (=Inland waters)|Marine	[{'habitat': 'Marine Coastal/Supratidal - Coastal Brackish/Saline Lagoons/Marine Lakes', 'code': '13.4', 'season': None, 'suitability': 'Suitable', 'majorimportance': None}, {'habitat': 'Wetlands (inland) - Permanent Rivers/Streams/Creeks (includes waterfalls)', 'code': '5.1', 'season': None, 'suitability': 'Suitable', 'majorimportance': None}, {'habitat': 'Wetlands (inland) - Permanent Saline, B…	[{'code': '9.2', 'score': 'Unknown', 'severity': 'Unknown', 'timing': 'Unknown', 'title': 'Industrial & military effluents', 'invasive': None, 'scope': 'Unknown'}, {'code': '9.2.2', 'score': 'Unknown', 'severity': 'Unknown', 'timing': 'Unknown', 'title': 'Seepage from mining', 'invasive': None, 'scope': 'Unknown'}]	It is unknown whether this species<em></em> is being impacted by any major threat processes. However, it is likely to be affected to some extent by mining activities such as nickel mining within New Caledonia's rivers (H. Larson pers. comm. 2008).
154708	ACTINOPTERYGII	PERCIFORMES	SPARIDAE	Diplodus	cervinus	Least Concern	Marine	[{'habitat': 'Marine Neritic - Estuaries', 'code': '9.10', 'season': 'unknown', 'suitability': 'Suitable', 'majorimportance': 'Yes'}, {'habitat': 'Marine Neritic - Subtidal Rock and Rocky Reefs', 'code': '9.2', 'season': 'unknown', 'suitability': 'Suitable', 'majorimportance': 'Yes'}, {'habitat': 'Marine Neritic - Subtidal Loose Rock/pebble/gravel', 'code': '9.3', 'season': 'unknown', 'suitabilit…	[{'code': '5.4', 'score': 'Unknown', 'severity': 'Unknown', 'timing': 'Ongoing', 'title': 'Fishing & harvesting aquatic resources', 'invasive': None, 'scope': 'Unknown'}, {'code': '5.4.2', 'score': 'Unknown', 'severity': 'Unknown', 'timing': 'Ongoing', 'title': 'Intentional use: (large scale) [harvest]', 'invasive': None, 'scope': 'Unknown'}]	<em>Diplodus cervinus</em> is overfished in the Canarian archipelago (Pajuelo<em> et al</em>. 2003a). Given that this species has a relatively slow life history and long generation time, these impacts are thought to pose a significant threat to local populations.
154731	ACTINOPTERYGII	GASTEROSTEIFORMES	GASTEROSTEIDAE	Apeltes	quadracus	Least Concern	Terrestrial|Freshwater (=Inland waters)	[{'habitat': 'Marine Intertidal - Salt Marshes (Emergent Grasses)', 'code': '12.5', 'season': None, 'suitability': 'Suitable', 'majorimportance': 'Yes'}, {'habitat': 'Marine Coastal/Supratidal - Coastal Brackish/Saline Lagoons/Marine Lakes', 'code': '13.4', 'season': None, 'suitability': 'Suitable', 'majorimportance': 'Yes'}, {'habitat': 'Wetlands (inland) - Permanent Rivers/Streams/Creeks (inclu…	[]	No major threats are known.
154976	ACTINOPTERYGII	PERCIFORMES	GOBIIDAE	Drombus	halei	Least Concern	Freshwater (=Inland waters)|Marine	[{'habitat': 'Marine Intertidal - Rocky Shoreline', 'code': '12.1', 'season': None, 'suitability': 'Suitable', 'majorimportance': None}, {'habitat': 'Marine Intertidal - Mud Flats and Salt Flats', 'code': '12.4', 'season': None, 'suitability': 'Suitable', 'majorimportance': None}, {'habitat': 'Marine Intertidal - Tidepools', 'code': '12.6', 'season': None, 'suitability': 'Suitable', 'majorimporta…	[]	There are no known major threats affecting this species. Due to the coastal nature of this species it may be undergoing declines in areas of intense coastal development and pollution, however much of this species range is underdeveloped and in good condition. It may be threatened by removal or destruction of its habitat - e.g. mangroves.
155018	ACTINOPTERYGII	SILURIFORMES	ARIIDAE	Sciades	parkeri	Vulnerable	Freshwater (=Inland waters)|Marine	[{'habitat': 'Wetlands (inland) - Permanent Rivers/Streams/Creeks (includes waterfalls)', 'code': '5.1', 'season': 'resident', 'suitability': 'Suitable', 'majorimportance': 'Yes'}, {'habitat': 'Marine Neritic - Estuaries', 'code': '9.10', 'season': 'resident', 'suitability': 'Suitable', 'majorimportance': 'Yes'}, {'habitat': 'Marine Neritic - Subtidal Sandy-Mud', 'code': '9.5', 'season': 'residen…	[{'code': '5.4', 'score': 'Unknown', 'severity': 'Unknown', 'timing': 'Ongoing', 'title': 'Fishing & harvesting aquatic resources', 'invasive': None, 'scope': 'Unknown'}, {'code': '5.4.1', 'score': 'Unknown', 'severity': 'Unknown', 'timing': 'Ongoing', 'title': 'Intentional use: (subsistence/small scale) [harvest]', 'invasive': None, 'scope': 'Unknown'}, {'code': '5.4.2', 'score': 'Unknown', 'sev…	<p><span style="">This species is exploited throughout its range.&#160;</span><span style="background-color: rgb(255, 255, 255);">Like other ariid, <em>S. parkeri</em> has low fecundity and exhibits parental care (mouth brooding) and may therefore be particularly vulnerable to intense fishing pressure.&#160;</span><span style="">It occupies estuarine areas where there is a potential threat from p…
155152	ACTINOPTERYGII	PERCIFORMES	LUTJANIDAE	Lutjanus	apodus	Least Concern	Marine	[{'habitat': 'Marine Neritic - Subtidal Rock and Rocky Reefs', 'code': '9.2', 'season': 'resident', 'suitability': 'Suitable', 'majorimportance': None}, {'habitat': 'Marine Neritic - Seagrass (Submerged)', 'code': '9.9', 'season': 'resident', 'suitability': 'Suitable', 'majorimportance': None}]	[{'code': '1.1', 'score': 'Unknown', 'severity': 'Unknown', 'timing': 'Ongoing', 'title': 'Housing & urban areas', 'invasive': None, 'scope': 'Unknown'}, {'code': '11.3', 'score': 'Unknown', 'severity': 'Unknown', 'timing': 'Ongoing', 'title': 'Temperature extremes', 'invasive': None, 'scope': 'Unknown'}, {'code': '11.4', 'score': 'Unknown', 'severity': 'Unknown', 'timing': 'Ongoing', 'title': 'S…	This species' association with mangroves and coral reefs renders it vulnerable to siltation, coral bleaching, coastal pollution and storm damage. This species is found at considerably greater abundances in areas which are not fished (Polunin and Roberts 1993). Trawling of seagrass beds within the range can impact recruitment (A. Acero pers. comm. 2009). In the Colombian Caribbean, this speciesâ€™…
155201	ACTINOPTERYGII	PERCIFORMES	AMBASSIDAE	Ambassis	urotaenia	Least Concern	Freshwater (=Inland waters)|Marine	[{'habitat': 'Marine Intertidal - Mangrove Submerged Roots', 'code': '12.7', 'season': None, 'suitability': 'Suitable', 'majorimportance': None}, {'habitat': 'Wetlands (inland) - Permanent Rivers/Streams/Creeks (includes waterfalls)', 'code': '5.1', 'season': None, 'suitability': 'Suitable', 'majorimportance': None}, {'habitat': 'Marine Neritic - Estuaries', 'code': '9.10', 'season': None, 'suita…	[]	It is unlikely that this species<em> </em>is being affected by any major threat processes; it has a broad geographic range and is found in a range of habitat types.
155273	ACTINOPTERYGII	PERCIFORMES	APOGONIDAE	Ostorhinchus	lateralis	Least Concern	Freshwater (=Inland waters)|Marine	[{'habitat': 'Marine Intertidal - Mangrove Submerged Roots', 'code': '12.7', 'season': None, 'suitability': 'Suitable', 'majorimportance': None}, {'habitat': 'Marine Neritic - Estuaries', 'code': '9.10', 'season': None, 'suitability': 'Suitable', 'majorimportance': None}, {'habitat': 'Inter-Reef Rubble Substrate', 'code': '9.8.6', 'season': None, 'suitability': 'Suitable', 'majorimportance': None…	[]	This species is not known to be directly targeted for the aquarium trade or any other commercial trade. Unlike other species of cardinal fish, it is less reliant on live reef systems. This species is found in a range of habitats that undergo daily fluctuations in temperature, salinity and pollutant concentrations. <br/><br/>Due to the widespread distribution of this species, it is unlikely that a…
15873	ACTINOPTERYGII	PERCIFORMES	SPARIDAE	Pagrus	pagrus	Least Concern	Marine	[{'habitat': 'Marine Neritic - Subtidal Rock and Rocky Reefs', 'code': '9.2', 'season': 'unknown', 'suitability': 'Suitable', 'majorimportance': 'Yes'}, {'habitat': 'Marine Neritic - Subtidal Loose Rock/pebble/gravel', 'code': '9.3', 'season': 'unknown', 'suitability': 'Suitable', 'majorimportance': 'Yes'}, {'habitat': 'Marine Neritic - Subtidal Sandy', 'code': '9.4', 'season': 'unknown', 'suitab…	[{'code': '5.4', 'score': 'Unknown', 'severity': 'Unknown', 'timing': 'Ongoing', 'title': 'Fishing & harvesting aquatic resources', 'invasive': None, 'scope': 'Unknown'}, {'code': '5.4.1', 'score': 'Unknown', 'severity': 'Unknown', 'timing': 'Ongoing', 'title': 'Intentional use: (subsistence/small scale) [harvest]', 'invasive': None, 'scope': 'Unknown'}, {'code': '5.4.2', 'score': 'Unknown', 'sev…	<em>Pagrus pagrus</em> is commercially very important in fisheries in most parts of its range. It is a significant component of commercial and recreational fisheries. There have been significant population declines in parts of its range; these declines are well documented in the southeastern stock of the United States, where it has experienced long-term and marked declines in recruitment, spawnin…
16012	ACTINOPTERYGII	PERCIFORMES	GOBIIDAE	Favonigobius	reichei	Least Concern	Freshwater (=Inland waters)|Marine	[{'habitat': 'Wetlands (inland) - Permanent Rivers/Streams/Creeks (includes waterfalls)', 'code': '5.1', 'season': None, 'suitability': 'Suitable', 'majorimportance': None}, {'habitat': 'Marine Neritic - Estuaries', 'code': '9.10', 'season': None, 'suitability': 'Suitable', 'majorimportance': None}]	[]	There are no known threats to this species.
16475	ACTINOPTERYGII	SYNGNATHIFORMES	PEGASIDAE	Pegasus	laternarius	Data Deficient	Marine	[{'habitat': 'Marine Oceanic - Epipelagic (0-200m)', 'code': '10.1', 'season': None, 'suitability': 'Suitable', 'majorimportance': None}, {'habitat': 'Marine Neritic - Pelagic', 'code': '9.1', 'season': None, 'suitability': 'Suitable', 'majorimportance': None}, {'habitat': 'Marine Neritic - Subtidal Loose Rock/pebble/gravel', 'code': '9.3', 'season': None, 'suitability': 'Unknown', 'majorimportan…	[{'code': '5.4', 'score': 'Unknown', 'severity': 'Unknown', 'timing': 'Ongoing', 'title': 'Fishing & harvesting aquatic resources', 'invasive': None, 'scope': 'Unknown'}, {'code': '5.4.3', 'score': 'Unknown', 'severity': 'Unknown', 'timing': 'Ongoing', 'title': 'Unintentional effects: (subsistence/small scale) [harvest]', 'invasive': None, 'scope': 'Unknown'}, {'code': '5.4.4', 'score': 'Unknown'…	The primary threat to <em>Pegasus laternarius </em>is being caught as bycatch in seine, trawl, and dredge fisheries that occur throughout its known habitat (Palsson and Pietsch 1989, Vincent 1997, Pietsch and Palsson 1999).
164893	ACTINOPTERYGII	PLEURONECTIFORMES	SOLEIDAE	Brachirus	harmandi	Least Concern	Freshwater (=Inland waters)|Marine	[{'habitat': 'Wetlands (inland) - Permanent Rivers/Streams/Creeks (includes waterfalls)', 'code': '5.1', 'season': None, 'suitability': 'Suitable', 'majorimportance': 'Yes'}, {'habitat': 'Wetlands (inland) - Seasonal/Intermittent/Irregular Rivers/Streams/Creeks', 'code': '5.2', 'season': None, 'suitability': 'Marginal', 'majorimportance': None}, {'habitat': 'Marine Neritic - Estuaries', 'code': '…	[{'code': '7.2', 'score': 'Unknown', 'severity': 'Unknown', 'timing': 'Ongoing', 'title': 'Dams & water management/use', 'invasive': None, 'scope': 'Minority (<50%)'}, {'code': '7.2.11', 'score': 'Unknown', 'severity': 'Unknown', 'timing': 'Ongoing', 'title': 'Dams (size unknown)', 'invasive': None, 'scope': 'Minority (<50%)'}]	Mainstream dams are a potential threat to this species. ICEM (2010) consider the species to be vulnerable to mainstream dams on the Mekong River.
166004	ACTINOPTERYGII	CYPRINIFORMES	CYPRINIDAE	Schizothorax	griseus	Least Concern	Freshwater (=Inland waters)	[{'habitat': 'Wetlands (inland) - Permanent Rivers/Streams/Creeks (includes waterfalls)', 'code': '5.1', 'season': None, 'suitability': 'Suitable', 'majorimportance': 'Yes'}]	[]	No information available on the threats to the species.
166005	ACTINOPTERYGII	CYPRINIFORMES	COBITIDAE	Sinibotia	pulchra	Data Deficient	Freshwater (=Inland waters)	[{'habitat': 'Wetlands (inland) - Permanent Rivers/Streams/Creeks (includes waterfalls)', 'code': '5.1', 'season': None, 'suitability': 'Suitable', 'majorimportance': 'Yes'}]	[{'code': '7.2', 'score': 'Unknown', 'severity': 'Unknown', 'timing': 'Ongoing', 'title': 'Dams & water management/use', 'invasive': None, 'scope': 'Unknown'}, {'code': '7.2.11', 'score': 'Unknown', 'severity': 'Unknown', 'timing': 'Ongoing', 'title': 'Dams (size unknown)', 'invasive': None, 'scope': 'Unknown'}, {'code': '9.1', 'score': 'Unknown', 'severity': 'Unknown', 'timing': 'Ongoing', 'titl…	The species occurs in areas that have been impacted by dams and water pollution.
166018	ACTINOPTERYGII	CYPRINIFORMES	CYPRINIDAE	Pseudogobio	guilinensis	Data Deficient	Freshwater (=Inland waters)	[{'habitat': 'Wetlands (inland) - Permanent Rivers/Streams/Creeks (includes waterfalls)', 'code': '5.1', 'season': None, 'suitability': 'Suitable', 'majorimportance': 'Yes'}]	[]	No information available on the threats to the species.
166021	ACTINOPTERYGII	PERCIFORMES	CHANNIDAE	Channa	asiatica	Least Concern	Freshwater (=Inland waters)	[{'habitat': 'Wetlands (inland) - Permanent Rivers/Streams/Creeks (includes waterfalls)', 'code': '5.1', 'season': None, 'suitability': 'Suitable', 'majorimportance': 'Yes'}]	[]	Threats are not known, but the species is likely to be impacted by pollution and habitat conversion.
166029	ACTINOPTERYGII	SILURIFORMES	BAGRIDAE	Tachysurus	intermedius	Least Concern	Freshwater (=Inland waters)	[{'habitat': 'Wetlands (inland) - Permanent Rivers/Streams/Creeks (includes waterfalls)', 'code': '5.1', 'season': None, 'suitability': 'Suitable', 'majorimportance': 'Yes'}]	[{'code': '7.2', 'score': 'Unknown', 'severity': 'Unknown', 'timing': 'Ongoing', 'title': 'Dams & water management/use', 'invasive': None, 'scope': 'Unknown'}, {'code': '7.2.11', 'score': 'Unknown', 'severity': 'Unknown', 'timing': 'Ongoing', 'title': 'Dams (size unknown)', 'invasive': None, 'scope': 'Unknown'}, {'code': '9.2', 'score': 'Unknown', 'severity': 'Unknown', 'timing': 'Ongoing', 'titl…	The susceptibility of the species to pollution is not known, however the species known localities are impacted by pollution from a range of sources, as well as drainage for agriculture and development.
166031	ACTINOPTERYGII	PERCIFORMES	ODONTOBUTIDAE	Sineleotris	chalmersi	Least Concern	Freshwater (=Inland waters)|Marine	[{'habitat': 'Wetlands (inland) - Permanent Rivers/Streams/Creeks (includes waterfalls)', 'code': '5.1', 'season': None, 'suitability': 'Suitable', 'majorimportance': 'Yes'}, {'habitat': 'Marine Neritic - Estuaries', 'code': '9.10', 'season': None, 'suitability': 'Suitable', 'majorimportance': 'No'}]	[]	No information available on the threats to the species.
166035	ACTINOPTERYGII	CYPRINIFORMES	COBITIDAE	Leptobotia	elongata	Vulnerable	Freshwater (=Inland waters)	[{'habitat': 'Wetlands (inland) - Permanent Rivers/Streams/Creeks (includes waterfalls)', 'code': '5.1', 'season': None, 'suitability': 'Suitable', 'majorimportance': 'Yes'}]	[{'code': '5.4', 'score': 'Unknown', 'severity': 'Rapid Declines', 'timing': 'Ongoing', 'title': 'Fishing & harvesting aquatic resources', 'invasive': None, 'scope': 'Unknown'}, {'code': '5.4.2', 'score': 'Unknown', 'severity': 'Rapid Declines', 'timing': 'Ongoing', 'title': 'Intentional use: (large scale) [harvest]', 'invasive': None, 'scope': 'Unknown'}, {'code': '7.2', 'score': 'Unknown', 'sev…	With soil erosion, dam construction,&#160;degradation of spawning grounds, blocking of traditional migratory paths&#160;and water pollution, the species' spawning environment and habitat has been greatly impacted in recent years. Overfishing not only reduced the species' population, but also resulted in great decreases in its food supply (Wang 1998, Liang <span style="font-style: italic;">et al.<…
166036	ACTINOPTERYGII	CYPRINIFORMES	CYPRINIDAE	Schizothorax	yunnanensis	Data Deficient	Freshwater (=Inland waters)	[{'habitat': 'Wetlands (inland) - Permanent Rivers/Streams/Creeks (includes waterfalls)', 'code': '5.1', 'season': None, 'suitability': 'Suitable', 'majorimportance': 'Yes'}, {'habitat': 'Wetlands (inland) - Permanent Freshwater Lakes (over 8ha)', 'code': '5.5', 'season': None, 'suitability': 'Suitable', 'majorimportance': 'Yes'}]	[{'code': '5.4', 'score': 'Medium Impact: 7', 'severity': 'Very Rapid Declines', 'timing': 'Ongoing', 'title': 'Fishing & harvesting aquatic resources', 'invasive': None, 'scope': 'Minority (<50%)'}, {'code': '5.4.2', 'score': 'Medium Impact: 7', 'severity': 'Very Rapid Declines', 'timing': 'Ongoing', 'title': 'Intentional use: (large scale) [harvest]', 'invasive': None, 'scope': 'Minority (<50%)…	Overfishing, pollution, and river modifications (e.g. dam construction) are major threats to this species.
166043	ACTINOPTERYGII	CYPRINIFORMES	CYPRINIDAE	Luciocyprinus	langsoni	Vulnerable	Freshwater (=Inland waters)	[{'habitat': 'Wetlands (inland) - Permanent Rivers/Streams/Creeks (includes waterfalls)', 'code': '5.1', 'season': None, 'suitability': 'Suitable', 'majorimportance': 'Yes'}, {'habitat': 'Wetlands (inland) - Permanent Freshwater Lakes (over 8ha)', 'code': '5.5', 'season': None, 'suitability': 'Marginal', 'majorimportance': None}]	[{'code': '5.3', 'score': 'Medium Impact: 6', 'severity': 'Slow, Significant Declines', 'timing': 'Ongoing', 'title': 'Logging & wood harvesting', 'invasive': None, 'scope': 'Majority (50-90%)'}, {'code': '5.3.3', 'score': 'Medium Impact: 6', 'severity': 'Slow, Significant Declines', 'timing': 'Ongoing', 'title': 'Unintentional effects: (subsistence/small scale) [harvest]', 'invasive': None, 'sco…	Threats include over-fishing, including illegal fishing methods (electric, poison or explosive fishing), and the construction of dams and weirs, especially in the upper reaches of rivers which hinder migrations.<br/><br/>In addition, spawning areas and the general river habitat are impacted by pollution, sedimentation, land reclamation, and water abstraction from rivers for agricultural irrigatio…
166051	ACTINOPTERYGII	PERCIFORMES	OSPHRONEMIDAE	Macropodus	opercularis	Least Concern	Freshwater (=Inland waters)	[{'habitat': 'Artificial/Aquatic - Seasonally Flooded Agricultural Land', 'code': '15.8', 'season': None, 'suitability': 'Suitable', 'majorimportance': 'No'}, {'habitat': 'Artificial/Aquatic - Canals and Drainage Channels, Ditches', 'code': '15.9', 'season': None, 'suitability': 'Suitable', 'majorimportance': 'No'}, {'habitat': 'Wetlands (inland) - Permanent Rivers/Streams/Creeks (includes waterf…	[{'code': '1.1', 'score': 'Low Impact: 5', 'severity': 'Slow, Significant Declines', 'timing': 'Ongoing', 'title': 'Housing & urban areas', 'invasive': None, 'scope': 'Minority (<50%)'}, {'code': '1.2', 'score': 'Low Impact: 5', 'severity': 'Causing/Could cause fluctuations', 'timing': 'Ongoing', 'title': 'Commercial & industrial areas', 'invasive': None, 'scope': 'Minority (<50%)'}, {'code': '9.…	Threats to this species are habitat destruction and water pollution through pesticide use on agriculture land. <span class="keyword">
166052	ACTINOPTERYGII	CYPRINIFORMES	CYPRINIDAE	Cyprinus	rubrofuscus	Least Concern	Freshwater (=Inland waters)	[{'habitat': 'Wetlands (inland) - Permanent Rivers/Streams/Creeks (includes waterfalls)', 'code': '5.1', 'season': None, 'suitability': 'Suitable', 'majorimportance': 'Yes'}]	[]	The species is not threatened.
166053	ACTINOPTERYGII	CYPRINIFORMES	BALITORIDAE	Nemacheilus	binotatus	Data Deficient	Freshwater (=Inland waters)	[{'habitat': 'Wetlands (inland) - Permanent Rivers/Streams/Creeks (includes waterfalls)', 'code': '5.1', 'season': None, 'suitability': 'Suitable', 'majorimportance': 'Yes'}]	[{'code': '7.2', 'score': 'Unknown', 'severity': 'Unknown', 'timing': 'Ongoing', 'title': 'Dams & water management/use', 'invasive': None, 'scope': 'Minority (<50%)'}, {'code': '7.2.11', 'score': 'Unknown', 'severity': 'Unknown', 'timing': 'Ongoing', 'title': 'Dams (size unknown)', 'invasive': None, 'scope': 'Minority (<50%)'}, {'code': '7.3', 'score': 'Unknown', 'severity': 'Unknown', 'timing': …	<p> </p><p><span lang="EN-GB">Anthropogenic modification of river morphology impacts this species by reducing or interrupting fast water flow. Logging, deforestation and agriculture occurs in the area, with associated impacts on the aquatic environment (M. Kottelat pers. comm. 2011).</p>
166054	ACTINOPTERYGII	CYPRINIFORMES	CYPRINIDAE	Gobiobotia	kolleri	Data Deficient	Freshwater (=Inland waters)	[{'habitat': 'Wetlands (inland) - Permanent Rivers/Streams/Creeks (includes waterfalls)', 'code': '5.1', 'season': None, 'suitability': 'Suitable', 'majorimportance': 'Yes'}]	[]	No information available on the threats to the species.
166058	ACTINOPTERYGII	CYPRINIFORMES	COBITIDAE	Sinibotia	robusta	Data Deficient	Freshwater (=Inland waters)	[{'habitat': 'Wetlands (inland) - Permanent Rivers/Streams/Creeks (includes waterfalls)', 'code': '5.1', 'season': None, 'suitability': 'Suitable', 'majorimportance': 'Yes'}]	[]	No information available on the threats to the species.
166059	ACTINOPTERYGII	CYPRINIFORMES	CYPRINIDAE	Osteochilus	salsburyi	Least Concern	Freshwater (=Inland waters)	[{'habitat': 'Wetlands (inland) - Permanent Rivers/Streams/Creeks (includes waterfalls)', 'code': '5.1', 'season': None, 'suitability': 'Suitable', 'majorimportance': 'Yes'}]	[{'code': '9.1', 'score': 'Unknown', 'severity': 'Unknown', 'timing': 'Ongoing', 'title': 'Domestic & urban waste water', 'invasive': None, 'scope': 'Unknown'}, {'code': '9.1.1', 'score': 'Unknown', 'severity': 'Unknown', 'timing': 'Ongoing', 'title': 'Sewage', 'invasive': None, 'scope': 'Unknown'}, {'code': '9.3', 'score': 'Unknown', 'severity': 'Unknown', 'timing': 'Ongoing', 'title': 'Agricult…	No information available on the specific threats to the species, but does occur in areas that are impacted by pollution.
166062	ACTINOPTERYGII	CYPRINIFORMES	BALITORIDAE	Schistura	incerta	Data Deficient	Freshwater (=Inland waters)	[{'habitat': 'Wetlands (inland) - Seasonal/Intermittent/Irregular Rivers/Streams/Creeks', 'code': '5.2', 'season': None, 'suitability': 'Suitable', 'majorimportance': 'Yes'}]	[]	No information available on the threats to the species.
166071	ACTINOPTERYGII	SILURIFORMES	BAGRIDAE	Tachysurus	vachellii	Data Deficient	Freshwater (=Inland waters)	[{'habitat': 'Artificial/Aquatic - Water Storage Areas (over 8ha)', 'code': '15.1', 'season': None, 'suitability': 'Unknown', 'majorimportance': None}, {'habitat': 'Wetlands (inland) - Permanent Rivers/Streams/Creeks (includes waterfalls)', 'code': '5.1', 'season': None, 'suitability': 'Suitable', 'majorimportance': 'Yes'}, {'habitat': 'Wetlands (inland) - Permanent Freshwater Lakes (over 8ha)', …	[{'code': '7.3', 'score': 'Unknown', 'severity': 'Unknown', 'timing': 'Ongoing', 'title': 'Other ecosystem modifications', 'invasive': None, 'scope': 'Majority (50-90%)'}, {'code': '9.2', 'score': 'Unknown', 'severity': 'Unknown', 'timing': 'Ongoing', 'title': 'Industrial & military effluents', 'invasive': None, 'scope': 'Majority (50-90%)'}, {'code': '9.2.3', 'score': 'Unknown', 'severity': 'Unk…	Water pollution and loss of habitat are the major reasons for population declines.
166072	ACTINOPTERYGII	CYPRINIFORMES	CYPRINIDAE	Onychostoma	ovale	Data Deficient	Freshwater (=Inland waters)	[{'habitat': 'Wetlands (inland) - Permanent Rivers/Streams/Creeks (includes waterfalls)', 'code': '5.1', 'season': None, 'suitability': None, 'majorimportance': None}]	[]	No information available on the threats to the species.
166076	ACTINOPTERYGII	CYPRINIFORMES	BALITORIDAE	Erromyzon	sinensis	Data Deficient	Freshwater (=Inland waters)	[{'habitat': 'Wetlands (inland) - Permanent Rivers/Streams/Creeks (includes waterfalls)', 'code': '5.1', 'season': None, 'suitability': 'Suitable', 'majorimportance': 'Yes'}]	[{'code': '2.1', 'score': 'Low Impact: 3', 'severity': None, 'timing': 'Ongoing', 'title': 'Annual & perennial non-timber crops', 'invasive': None, 'scope': None}, {'code': '2.1.4', 'score': 'Low Impact: 3', 'severity': None, 'timing': 'Ongoing', 'title': 'Scale Unknown/Unrecorded', 'invasive': None, 'scope': None}, {'code': '5.3', 'score': 'Low Impact: 3', 'severity': None, 'timing': 'Ongoing', …	Human modification of river morphology impacts this species by reducing or interrupting water flow. Logging, deforestation and agriculture occur throughout the species' range; impacts associated with these activities are expected to affect the aquatic environment (M. Kottelat pers. comm. 2011).
166080	ACTINOPTERYGII	CYPRINIFORMES	BALITORIDAE	Schistura	fasciolata	Data Deficient	Freshwater (=Inland waters)	[{'habitat': 'Wetlands (inland) - Permanent Rivers/Streams/Creeks (includes waterfalls)', 'code': '5.1', 'season': None, 'suitability': 'Suitable', 'majorimportance': 'Yes'}, {'habitat': 'Wetlands (inland) - Seasonal/Intermittent/Irregular Rivers/Streams/Creeks', 'code': '5.2', 'season': None, 'suitability': 'Suitable', 'majorimportance': 'No'}]	[]	No information available on the specific threats to the species. However the species occurs in areas that have been heavily impacted by dams and pollution.
166083	ACTINOPTERYGII	CYPRINIFORMES	CYPRINIDAE	Carassius	auratus	Least Concern	Freshwater (=Inland waters)	[{'habitat': 'Artificial/Aquatic - Water Storage Areas (over 8ha)', 'code': '15.1', 'season': None, 'suitability': 'Unknown', 'majorimportance': None}, {'habitat': 'Artificial/Aquatic - Ponds (below 8ha)', 'code': '15.2', 'season': None, 'suitability': 'Unknown', 'majorimportance': None}, {'habitat': 'Artificial/Aquatic - Aquaculture Ponds', 'code': '15.3', 'season': None, 'suitability': 'Unknown…	[]	No threats to this species are known.
166090	ACTINOPTERYGII	PERCIFORMES	CHANNIDAE	Channa	maculata	Least Concern	Freshwater (=Inland waters)	[{'habitat': 'Wetlands (inland) - Permanent Rivers/Streams/Creeks (includes waterfalls)', 'code': '5.1', 'season': None, 'suitability': 'Suitable', 'majorimportance': 'Yes'}]	[{'code': '5.4', 'score': 'Medium Impact: 6', 'severity': 'Slow, Significant Declines', 'timing': 'Ongoing', 'title': 'Fishing & harvesting aquatic resources', 'invasive': None, 'scope': 'Majority (50-90%)'}, {'code': '5.4.1', 'score': 'Medium Impact: 6', 'severity': 'Slow, Significant Declines', 'timing': 'Ongoing', 'title': 'Intentional use: (subsistence/small scale) [harvest]', 'invasive': Non…	In its natural distribution range, major threats to the species are overfishing (especially in the spawning season, when prices are high) and habitat destruction. In China, production of the species from the wild has declined over the past 10-15 years. In some areas, this species has become scarce.
166092	ACTINOPTERYGII	PERCIFORMES	PERCICHTHYIDAE	Coreoperca	whiteheadi	Least Concern	Freshwater (=Inland waters)	[{'habitat': 'Wetlands (inland) - Permanent Rivers/Streams/Creeks (includes waterfalls)', 'code': '5.1', 'season': None, 'suitability': 'Suitable', 'majorimportance': 'Yes'}, {'habitat': 'Marine Neritic - Estuaries', 'code': '9.10', 'season': None, 'suitability': 'Suitable', 'majorimportance': 'Yes'}]	[]	No information available on the threats to the species.
166098	ACTINOPTERYGII	CYPRINIFORMES	BALITORIDAE	Schistura	hingi	Least Concern	Freshwater (=Inland waters)	[{'habitat': 'Wetlands (inland) - Permanent Rivers/Streams/Creeks (includes waterfalls)', 'code': '5.1', 'season': None, 'suitability': 'Suitable', 'majorimportance': 'Yes'}]	[{'code': '5.4', 'score': 'Unknown', 'severity': 'Unknown', 'timing': 'Ongoing', 'title': 'Fishing & harvesting aquatic resources', 'invasive': None, 'scope': 'Unknown'}, {'code': '5.4.1', 'score': 'Unknown', 'severity': 'Unknown', 'timing': 'Ongoing', 'title': 'Intentional use: (subsistence/small scale) [harvest]', 'invasive': None, 'scope': 'Unknown'}, {'code': '5.4.2', 'score': 'Unknown', 'sev…	Major threats to <span style="font-style: italic;">Schistura hingi</span> are dams, overfishing and water pollution.
166103	ACTINOPTERYGII	CYPRINIFORMES	CYPRINIDAE	Luciobrama	macrocephalus	Data Deficient	Freshwater (=Inland waters)	[{'habitat': 'Wetlands (inland) - Permanent Rivers/Streams/Creeks (includes waterfalls)', 'code': '5.1', 'season': None, 'suitability': 'Suitable', 'majorimportance': 'Yes'}, {'habitat': 'Wetlands (inland) - Seasonal/Intermittent Freshwater Lakes (over 8ha)', 'code': '5.6', 'season': None, 'suitability': 'Suitable', 'majorimportance': 'Yes'}, {'habitat': 'Wetlands (inland) - Seasonal/Intermittent…	[{'code': '5.4', 'score': 'Medium Impact: 6', 'severity': 'Slow, Significant Declines', 'timing': 'Ongoing', 'title': 'Fishing & harvesting aquatic resources', 'invasive': None, 'scope': 'Majority (50-90%)'}, {'code': '5.4.4', 'score': 'Medium Impact: 6', 'severity': 'Slow, Significant Declines', 'timing': 'Ongoing', 'title': 'Unintentional effects: (large scale) [harvest]', 'invasive': None, 'sc…	Major threats to <span style="font-style: italic;">Luciobrama macrocephalus </span>are overfishing and river modifications (e.g. dams, dykes and floodgate construction, reclamation of floodplains into agriculture land) which blocks the connection between main rivers and floodplain lakes (Wang 1998).
166106	ACTINOPTERYGII	CYPRINIFORMES	BALITORIDAE	Oreonectes	platycephalus	Data Deficient	Freshwater (=Inland waters)	[{'habitat': 'Wetlands (inland) - Permanent Rivers/Streams/Creeks (includes waterfalls)', 'code': '5.1', 'season': None, 'suitability': 'Suitable', 'majorimportance': 'Yes'}]	[]	No information available on the threats to the species.
166112	ACTINOPTERYGII	CYPRINIFORMES	CYPRINIDAE	Mylopharyngodon	piceus	Data Deficient	Freshwater (=Inland waters)	[{'habitat': 'Wetlands (inland) - Permanent Rivers/Streams/Creeks (includes waterfalls)', 'code': '5.1', 'season': None, 'suitability': 'Suitable', 'majorimportance': 'Yes'}, {'habitat': 'Wetlands (inland) - Permanent Freshwater Lakes (over 8ha)', 'code': '5.5', 'season': None, 'suitability': 'Suitable', 'majorimportance': 'Yes'}, {'habitat': 'Wetlands (inland) - Seasonal/Intermittent Freshwater …	[{'code': '2.1', 'score': 'Unknown', 'severity': 'Unknown', 'timing': 'Ongoing', 'title': 'Annual & perennial non-timber crops', 'invasive': None, 'scope': 'Unknown'}, {'code': '2.1.4', 'score': 'Unknown', 'severity': 'Unknown', 'timing': 'Ongoing', 'title': 'Scale Unknown/Unrecorded', 'invasive': None, 'scope': 'Unknown'}, {'code': '5.4', 'score': 'Unknown', 'severity': 'Unknown', 'timing': 'Ong…	<p>Major threats to this species are overfishing, river modifications such as dam construction and the conversion of floodplains into agriculture land and water pollution.</p>
166118	ACTINOPTERYGII	CYPRINIFORMES	CYPRINIDAE	Squalidus	argentatus	Data Deficient	Freshwater (=Inland waters)	[{'habitat': 'Wetlands (inland) - Permanent Rivers/Streams/Creeks (includes waterfalls)', 'code': '5.1', 'season': None, 'suitability': 'Suitable', 'majorimportance': 'Yes'}]	[{'code': '5.4', 'score': 'Unknown', 'severity': 'Unknown', 'timing': 'Ongoing', 'title': 'Fishing & harvesting aquatic resources', 'invasive': None, 'scope': 'Majority (50-90%)'}, {'code': '5.4.1', 'score': 'Unknown', 'severity': 'Unknown', 'timing': 'Ongoing', 'title': 'Intentional use: (subsistence/small scale) [harvest]', 'invasive': None, 'scope': 'Majority (50-90%)'}, {'code': '5.4.2', 'sco…	Over harvesting and pollution are threatening the species.
166124	ACTINOPTERYGII	SILURIFORMES	CLARIIDAE	Clarias	fuscus	Least Concern	Freshwater (=Inland waters)	[{'habitat': 'Artificial/Aquatic - Water Storage Areas (over 8ha)', 'code': '15.1', 'season': None, 'suitability': 'Unknown', 'majorimportance': None}, {'habitat': 'Artificial/Aquatic - Ponds (below 8ha)', 'code': '15.2', 'season': None, 'suitability': 'Unknown', 'majorimportance': None}, {'habitat': 'Artificial/Aquatic - Canals and Drainage Channels, Ditches', 'code': '15.9', 'season': None, 'su…	[]	The threats to this species are not known.
166132	ACTINOPTERYGII	CYPRINIFORMES	CYPRINIDAE	Gobiobotia	meridionalis	Data Deficient	Freshwater (=Inland waters)	[{'habitat': 'Wetlands (inland) - Permanent Rivers/Streams/Creeks (includes waterfalls)', 'code': '5.1', 'season': None, 'suitability': 'Suitable', 'majorimportance': 'Yes'}]	[]	No information available on the threats to the species.
166133	ACTINOPTERYGII	CYPRINIFORMES	CYPRINIDAE	Microphysogobio	labeoides	Data Deficient	Freshwater (=Inland waters)	[{'habitat': 'Wetlands (inland) - Permanent Rivers/Streams/Creeks (includes waterfalls)', 'code': '5.1', 'season': None, 'suitability': 'Suitable', 'majorimportance': 'Yes'}]	[]	Threats to the species are not known.
166135	ACTINOPTERYGII	CYPRINIFORMES	CYPRINIDAE	Schizothorax	lissolabiatus	Least Concern	Freshwater (=Inland waters)	[{'habitat': 'Wetlands (inland) - Permanent Rivers/Streams/Creeks (includes waterfalls)', 'code': '5.1', 'season': None, 'suitability': 'Suitable', 'majorimportance': 'Yes'}]	[]	No information is available on the threats to this species.
166136	ACTINOPTERYGII	CYPRINIFORMES	CYPRINIDAE	Pseudorasbora	parva	Least Concern	Freshwater (=Inland waters)	[{'habitat': 'Wetlands (inland) - Permanent Rivers/Streams/Creeks (includes waterfalls)', 'code': '5.1', 'season': None, 'suitability': 'Suitable', 'majorimportance': 'Yes'}]	[]	No information available on the threats to the species.
166138	ACTINOPTERYGII	PERCIFORMES	ELEOTRIDAE	Bostrychus	sinensis	Least Concern	Freshwater (=Inland waters)|Marine	[{'habitat': 'Marine Intertidal - Tidepools', 'code': '12.6', 'season': None, 'suitability': 'Suitable', 'majorimportance': 'No'}, {'habitat': 'Marine Intertidal - Mangrove Submerged Roots', 'code': '12.7', 'season': None, 'suitability': 'Suitable', 'majorimportance': 'Yes'}, {'habitat': 'Artificial/Marine - Mari/Brackishculture Ponds', 'code': '15.13', 'season': None, 'suitability': 'Unknown', '…	[]	<p>As this species occurrence is linked to mangroves and estuaries, any threats to these habitats may affect its populations. However, it appears to be resilient and has been collected in marginal to damaged habitat in Indonesia and Malaysia (Larson, H. pers. comm. 2011).<br/></p>
166143	ACTINOPTERYGII	CYPRINIFORMES	CYPRINIDAE	Chanodichthys	erythropterus	Least Concern	Freshwater (=Inland waters)	[{'habitat': 'Wetlands (inland) - Permanent Rivers/Streams/Creeks (includes waterfalls)', 'code': '5.1', 'season': None, 'suitability': 'Suitable', 'majorimportance': 'Yes'}, {'habitat': 'Wetlands (inland) - Permanent Freshwater Lakes (over 8ha)', 'code': '5.5', 'season': None, 'suitability': 'Suitable', 'majorimportance': 'Yes'}]	[]	<p> </p>Unlikely to have threats across its range.<span lang="EN-US"><br/> <p></p>
166152	ACTINOPTERYGII	CYPRINIFORMES	CYPRINIDAE	Carassioides	acuminatus	Least Concern	Freshwater (=Inland waters)	[{'habitat': 'Artificial/Aquatic - Water Storage Areas (over 8ha)', 'code': '15.1', 'season': None, 'suitability': 'Suitable', 'majorimportance': 'No'}, {'habitat': 'Wetlands (inland) - Permanent Rivers/Streams/Creeks (includes waterfalls)', 'code': '5.1', 'season': None, 'suitability': 'Suitable', 'majorimportance': 'Yes'}, {'habitat': 'Wetlands (inland) - Permanent Freshwater Lakes (over 8ha)',…	[{'code': '1.2', 'score': 'High Impact: 9', 'severity': 'Very Rapid Declines', 'timing': 'Ongoing', 'title': 'Commercial & industrial areas', 'invasive': None, 'scope': 'Whole (>90%)'}]	<p>No information available on the threats to the species.<br/></p>
166158	ACTINOPTERYGII	CYPRINIFORMES	COBITIDAE	Misgurnus	anguillicaudatus	Least Concern	Freshwater (=Inland waters)	[{'habitat': 'Artificial/Aquatic - Irrigated Land (includes irrigation channels)', 'code': '15.7', 'season': None, 'suitability': 'Suitable', 'majorimportance': 'No'}, {'habitat': 'Artificial/Aquatic - Canals and Drainage Channels, Ditches', 'code': '15.9', 'season': None, 'suitability': 'Suitable', 'majorimportance': 'No'}, {'habitat': 'Wetlands (inland) - Permanent Rivers/Streams/Creeks (includ…	[{'code': '7.3', 'score': 'Low Impact: 5', 'severity': 'Slow, Significant Declines', 'timing': 'Ongoing', 'title': 'Other ecosystem modifications', 'invasive': None, 'scope': 'Minority (<50%)'}, {'code': '9.3', 'score': 'Low Impact: 5', 'severity': 'Slow, Significant Declines', 'timing': 'Ongoing', 'title': 'Agricultural & forestry effluents', 'invasive': None, 'scope': 'Minority (<50%)'}, {'code…	Kano <span style="font-style: italic;">et al. </span>(2010) record that the species has been impacted by agricultural intensification, especially the use of agrochemicals, and the species has declined in parts of China as a result of ecosystem degradation (Qin <span style="font-style: italic;">et al. </span>2010). The species global population is expanding through introductions, and is not throug…
166159	ACTINOPTERYGII	PERCIFORMES	PERCICHTHYIDAE	Siniperca	scherzeri	Data Deficient	Freshwater (=Inland waters)	[{'habitat': 'Wetlands (inland) - Permanent Rivers/Streams/Creeks (includes waterfalls)', 'code': '5.1', 'season': None, 'suitability': 'Suitable', 'majorimportance': 'Yes'}]	[{'code': '5.4', 'score': 'Medium Impact: 6', 'severity': 'Slow, Significant Declines', 'timing': 'Ongoing', 'title': 'Fishing & harvesting aquatic resources', 'invasive': None, 'scope': 'Majority (50-90%)'}, {'code': '5.4.1', 'score': 'Medium Impact: 6', 'severity': 'Slow, Significant Declines', 'timing': 'Ongoing', 'title': 'Intentional use: (subsistence/small scale) [harvest]', 'invasive': Non…	Major threats to <span style="font-style: italic;">Siniperca scherzeri</span> are overfishing and water pollution.
166161	ACTINOPTERYGII	CYPRINIFORMES	CYPRINIDAE	Garra	imberba	Data Deficient	Freshwater (=Inland waters)	[{'habitat': 'Wetlands (inland) - Permanent Rivers/Streams/Creeks (includes waterfalls)', 'code': '5.1', 'season': None, 'suitability': 'Suitable', 'majorimportance': 'Yes'}]	[{'code': '7.2', 'score': 'Unknown', 'severity': 'Unknown', 'timing': 'Ongoing', 'title': 'Dams & water management/use', 'invasive': None, 'scope': 'Majority (50-90%)'}, {'code': '7.2.11', 'score': 'Unknown', 'severity': 'Unknown', 'timing': 'Ongoing', 'title': 'Dams (size unknown)', 'invasive': None, 'scope': 'Majority (50-90%)'}, {'code': '9.3', 'score': 'Unknown', 'severity': 'Unknown', 'timin…	No information available on the threats to the species. However, erosion and siltation result in sediments covering the stone and eliminates its food source. Alteration of river morphology (especially dams) reduces the current or inundate the rapids and eliminate its habitat.
166171	ACTINOPTERYGII	PERCIFORMES	ELEOTRIDAE	Eleotris	oxycephala	Least Concern	Freshwater (=Inland waters)|Marine	[{'habitat': 'Marine Intertidal - Mangrove Submerged Roots', 'code': '12.7', 'season': None, 'suitability': 'Suitable', 'majorimportance': 'Yes'}, {'habitat': 'Marine Coastal/Supratidal - Coastal Brackish/Saline Lagoons/Marine Lakes', 'code': '13.4', 'season': None, 'suitability': 'Suitable', 'majorimportance': 'No'}, {'habitat': 'Wetlands (inland) - Permanent Rivers/Streams/Creeks (includes wate…	[]	No information is available on threats to the species.
166172	ACTINOPTERYGII	CYPRINIFORMES	CYPRINIDAE	Hypophthalmichthys	nobilis	Data Deficient	Freshwater (=Inland waters)	[{'habitat': 'Wetlands (inland) - Permanent Rivers/Streams/Creeks (includes waterfalls)', 'code': '5.1', 'season': None, 'suitability': 'Suitable', 'majorimportance': 'Yes'}, {'habitat': 'Wetlands (inland) - Permanent Saline, Brackish or Alkaline Lakes', 'code': '5.14', 'season': None, 'suitability': 'Unknown', 'majorimportance': None}, {'habitat': 'Wetlands (inland) - Seasonal/Intermittent Salin…	[{'code': '2.1', 'score': 'Unknown', 'severity': 'Unknown', 'timing': 'Ongoing', 'title': 'Annual & perennial non-timber crops', 'invasive': None, 'scope': 'Unknown'}, {'code': '2.1.4', 'score': 'Unknown', 'severity': 'Unknown', 'timing': 'Ongoing', 'title': 'Scale Unknown/Unrecorded', 'invasive': None, 'scope': 'Unknown'}, {'code': '5.4', 'score': 'Unknown', 'severity': 'Unknown', 'timing': 'Ong…	Major threats to <span style="font-style: italic;">Hypophthalmichthys nobilis </span>in its native distribution range are overfishing and river modifications (e.g. dams, dykes and floodgate construction and reclamation of floodplains into agriculture land) (Duan<span style="font-style: italic;"> et. al </span>2009).
166180	ACTINOPTERYGII	CYPRINIFORMES	CYPRINIDAE	Hemibarbus	macracanthus	Data Deficient	Freshwater (=Inland waters)	[{'habitat': 'Wetlands (inland) - Permanent Rivers/Streams/Creeks (includes waterfalls)', 'code': '5.1', 'season': None, 'suitability': 'Suitable', 'majorimportance': 'Yes'}]	[]	Without greater information on the species distribution and ecology, nothing can be inferred of its threats. But it is expected to be impacted by human activity (agricultural pollution, overfishing, habitat modification, introductions, etc.)
166181	ACTINOPTERYGII	SILURIFORMES	BAGRIDAE	Hemibagrus	guttatus	Data Deficient	Freshwater (=Inland waters)	[{'habitat': 'Wetlands (inland) - Permanent Rivers/Streams/Creeks (includes waterfalls)', 'code': '5.1', 'season': None, 'suitability': 'Suitable', 'majorimportance': 'Yes'}]	[{'code': '5.4', 'score': 'Unknown', 'severity': 'Unknown', 'timing': 'Ongoing', 'title': 'Fishing & harvesting aquatic resources', 'invasive': None, 'scope': 'Unknown'}, {'code': '5.4.1', 'score': 'Unknown', 'severity': 'Unknown', 'timing': 'Ongoing', 'title': 'Intentional use: (subsistence/small scale) [harvest]', 'invasive': None, 'scope': 'Unknown'}, {'code': '7.2', 'score': 'Unknown', 'sever…	Construction of dams and over-fishing are the major threats to the species.
166183	ACTINOPTERYGII	CYPRINIFORMES	CYPRINIDAE	Metzia	formosae	Least Concern	Freshwater (=Inland waters)	[{'habitat': 'Artificial/Aquatic - Seasonally Flooded Agricultural Land', 'code': '15.8', 'season': None, 'suitability': 'Suitable', 'majorimportance': 'No'}, {'habitat': 'Artificial/Aquatic - Canals and Drainage Channels, Ditches', 'code': '15.9', 'season': None, 'suitability': 'Suitable', 'majorimportance': 'No'}, {'habitat': 'Wetlands (inland) - Permanent Rivers/Streams/Creeks (includes waterf…	[{'code': '7.2', 'score': 'Unknown', 'severity': 'Unknown', 'timing': 'Ongoing', 'title': 'Dams & water management/use', 'invasive': None, 'scope': 'Unknown'}, {'code': '7.2.11', 'score': 'Unknown', 'severity': 'Unknown', 'timing': 'Ongoing', 'title': 'Dams (size unknown)', 'invasive': None, 'scope': 'Unknown'}, {'code': '9.2', 'score': 'Unknown', 'severity': 'Unknown', 'timing': 'Ongoing', 'titl…	Specific threats to the species are unknown. However, there are some general impacts to the areas that the species is found in, such as dams and pollution<span style="font-style: italic;"></span>.
166184	ACTINOPTERYGII	ANGUILLIFORMES	ANGUILLIDAE	Anguilla	japonica	Endangered	Freshwater (=Inland waters)|Marine	[{'habitat': 'Marine Oceanic - Epipelagic (0-200m)', 'code': '10.1', 'season': 'breeding', 'suitability': 'Suitable', 'majorimportance': 'Yes'}, {'habitat': 'Marine Oceanic - Mesopelagic (200-1000m)', 'code': '10.2', 'season': 'breeding', 'suitability': 'Suitable', 'majorimportance': 'Yes'}, {'habitat': 'Marine Oceanic - Bathypelagic (1000-4000m)', 'code': '10.3', 'season': 'non-breeding', 'suita…	[{'code': '1.1', 'score': 'Unknown', 'severity': 'Unknown', 'timing': 'Ongoing', 'title': 'Housing & urban areas', 'invasive': None, 'scope': 'Unknown'}, {'code': '11.5', 'score': 'Medium Impact: 7', 'severity': 'Slow, Significant Declines', 'timing': 'Ongoing', 'title': 'Other impacts', 'invasive': None, 'scope': 'Whole (>90%)'}, {'code': '1.2', 'score': 'Unknown', 'severity': 'Unknown', 'timing…	<p><span lang="EN-US">Threats to this species include overfishing, loss of habitat and changes to oceanic conditions among other threats and as a result the FAO have suggested that Japanese eel stocks are outside safe biological limits and in recent years the fishery has not been sustainable (FAO 2013).&#160;These declines have, in the past, driven culture facilities to source glass eels of other…
166188	ACTINOPTERYGII	CYPRINIFORMES	CYPRINIDAE	Elopichthys	bambusa	Data Deficient	Freshwater (=Inland waters)	[{'habitat': 'Wetlands (inland) - Permanent Rivers/Streams/Creeks (includes waterfalls)', 'code': '5.1', 'season': None, 'suitability': None, 'majorimportance': None}]	[{'code': '5.4', 'score': 'No/Negligible Impact: 0', 'severity': None, 'timing': None, 'title': 'Fishing & harvesting aquatic resources', 'invasive': None, 'scope': None}, {'code': '5.4.1', 'score': 'No/Negligible Impact: 0', 'severity': None, 'timing': None, 'title': 'Intentional use: (subsistence/small scale) [harvest]', 'invasive': None, 'scope': None}, {'code': '7.2', 'score': 'No/Negligible …	Major threats to this species are overfishing, dam construction and water pollution.
166191	ACTINOPTERYGII	CYPRINIFORMES	CYPRINIDAE	Procypris	mera	Data Deficient	Freshwater (=Inland waters)	[{'habitat': 'Wetlands (inland) - Permanent Rivers/Streams/Creeks (includes waterfalls)', 'code': '5.1', 'season': None, 'suitability': 'Suitable', 'majorimportance': 'Yes'}]	[{'code': '5.4', 'score': 'Unknown', 'severity': 'Unknown', 'timing': 'Ongoing', 'title': 'Fishing & harvesting aquatic resources', 'invasive': None, 'scope': 'Unknown'}, {'code': '5.4.1', 'score': 'Unknown', 'severity': 'Unknown', 'timing': 'Ongoing', 'title': 'Intentional use: (subsistence/small scale) [harvest]', 'invasive': None, 'scope': 'Unknown'}, {'code': '5.4.2', 'score': 'Unknown', 'sev…	Major threats to <span style="font-style: italic;">Procypris mera</span> are overfishing and river modification (e.g. dam and floodgate construction) (Wang 1998).
166193	ACTINOPTERYGII	CYPRINIFORMES	CYPRINIDAE	Hemiculter	leucisculus	Least Concern	Freshwater (=Inland waters)	[{'habitat': 'Artificial/Aquatic - Water Storage Areas (over 8ha)', 'code': '15.1', 'season': None, 'suitability': 'Suitable', 'majorimportance': 'No'}, {'habitat': 'Wetlands (inland) - Permanent Rivers/Streams/Creeks (includes waterfalls)', 'code': '5.1', 'season': None, 'suitability': 'Suitable', 'majorimportance': 'Yes'}, {'habitat': 'Wetlands (inland) - Permanent Freshwater Lakes (over 8ha)',…	[]	No information available on specific threats, however the species is likely to be impacted by habitat loss and degradation in parts of its wide range.
166195	ACTINOPTERYGII	PERCIFORMES	PERCICHTHYIDAE	Siniperca	kneri	Data Deficient	Freshwater (=Inland waters)	[{'habitat': 'Wetlands (inland) - Permanent Rivers/Streams/Creeks (includes waterfalls)', 'code': '5.1', 'season': None, 'suitability': 'Suitable', 'majorimportance': 'Yes'}]	[{'code': '9.3', 'score': 'Unknown', 'severity': 'Unknown', 'timing': 'Ongoing', 'title': 'Agricultural & forestry effluents', 'invasive': None, 'scope': 'Unknown'}, {'code': '9.3.3', 'score': 'Unknown', 'severity': 'Unknown', 'timing': 'Ongoing', 'title': 'Herbicides and pesticides', 'invasive': None, 'scope': 'Unknown'}]	Species occurs in areas that have been impacted by water pollution. The species has been found to contain high levels of DDT in the Pearl River delta.
166196	ACTINOPTERYGII	CLUPEIFORMES	CLUPEIDAE	Clupanodon	thrissa	Least Concern	Freshwater (=Inland waters)|Marine	[{'habitat': 'Wetlands (inland) - Permanent Rivers/Streams/Creeks (includes waterfalls)', 'code': '5.1', 'season': 'resident', 'suitability': 'Suitable', 'majorimportance': 'Yes'}, {'habitat': 'Wetlands (inland) - Seasonal/Intermittent Saline, Brackish or Alkaline Marshes/Pools', 'code': '5.17', 'season': 'resident', 'suitability': 'Suitable', 'majorimportance': 'Yes'}, {'habitat': 'Marine Neriti…	[]	The threats to this species are unknown. Estuarine pollution, coastal degradation, and over-fishing are thought to threaten this species in parts of its range (Berge <em>et al.</em> 2007), though more research is necessary to determine the extent to which these threats impact this species.
166197	ACTINOPTERYGII	OSMERIFORMES	SALANGIDAE	Salanx	chinensis	Data Deficient	Freshwater (=Inland waters)|Marine	[{'habitat': 'Marine Oceanic - Epipelagic (0-200m)', 'code': '10.1', 'season': None, 'suitability': 'Suitable', 'majorimportance': 'Yes'}, {'habitat': 'Wetlands (inland) - Permanent Rivers/Streams/Creeks (includes waterfalls)', 'code': '5.1', 'season': None, 'suitability': 'Suitable', 'majorimportance': 'Yes'}]	[{'code': '5.4', 'score': 'Unknown', 'severity': 'Unknown', 'timing': 'Ongoing', 'title': 'Fishing & harvesting aquatic resources', 'invasive': None, 'scope': 'Unknown'}, {'code': '5.4.1', 'score': 'Unknown', 'severity': 'Unknown', 'timing': 'Ongoing', 'title': 'Intentional use: (subsistence/small scale) [harvest]', 'invasive': None, 'scope': 'Unknown'}, {'code': '5.4.2', 'score': 'Unknown', 'sev…	Major threats to the species are overfishing, river modifications (e.g. dam construction) and the degradation of spawning and nursery habitats in rivers through soil erosion and water pollution.
166198	ACTINOPTERYGII	CYPRINIFORMES	CYPRINIDAE	Acrossocheilus	clivosius	Data Deficient	Freshwater (=Inland waters)	[{'habitat': 'Wetlands (inland) - Permanent Rivers/Streams/Creeks (includes waterfalls)', 'code': '5.1', 'season': None, 'suitability': 'Suitable', 'majorimportance': None}]	[{'code': '7.2', 'score': 'Unknown', 'severity': 'Unknown', 'timing': 'Ongoing', 'title': 'Dams & water management/use', 'invasive': None, 'scope': 'Minority (<50%)'}, {'code': '7.2.11', 'score': 'Unknown', 'severity': 'Unknown', 'timing': 'Ongoing', 'title': 'Dams (size unknown)', 'invasive': None, 'scope': 'Minority (<50%)'}, {'code': '9.1', 'score': 'Medium Impact: 6', 'severity': 'Slow, Signi…	There is no specific information available, but most drainages in southern China are impacted by dams and agricultural pollution.
166200	ACTINOPTERYGII	OSMERIFORMES	SALANGIDAE	Salanx	cuvieri	Data Deficient	Freshwater (=Inland waters)|Marine	[{'habitat': 'Marine Oceanic - Epipelagic (0-200m)', 'code': '10.1', 'season': None, 'suitability': 'Suitable', 'majorimportance': 'Yes'}, {'habitat': 'Marine Coastal/Supratidal - Coastal Freshwater Lakes', 'code': '13.5', 'season': None, 'suitability': 'Unknown', 'majorimportance': None}, {'habitat': 'Wetlands (inland) - Permanent Rivers/Streams/Creeks (includes waterfalls)', 'code': '5.1', 'sea…	[{'code': '5.4', 'score': 'Unknown', 'severity': 'Unknown', 'timing': 'Ongoing', 'title': 'Fishing & harvesting aquatic resources', 'invasive': None, 'scope': 'Unknown'}, {'code': '5.4.1', 'score': 'Unknown', 'severity': 'Unknown', 'timing': 'Ongoing', 'title': 'Intentional use: (subsistence/small scale) [harvest]', 'invasive': None, 'scope': 'Unknown'}, {'code': '5.4.2', 'score': 'Unknown', 'sev…	Major threats to <span style="font-style: italic;">Salanx cuvieri</span> are overfishing, river modifications (e.g. dam construction) and habitat degradation through soil erosion and water pollution.
166207	ACTINOPTERYGII	CYPRINIFORMES	COBITIDAE	Sinibotia	superciliaris	Data Deficient	Freshwater (=Inland waters)	[{'habitat': 'Wetlands (inland) - Permanent Rivers/Streams/Creeks (includes waterfalls)', 'code': '5.1', 'season': None, 'suitability': 'Suitable', 'majorimportance': 'Yes'}]	[{'code': '7.2', 'score': 'Unknown', 'severity': 'Unknown', 'timing': 'Ongoing', 'title': 'Dams & water management/use', 'invasive': None, 'scope': 'Unknown'}, {'code': '7.2.11', 'score': 'Unknown', 'severity': 'Unknown', 'timing': 'Ongoing', 'title': 'Dams (size unknown)', 'invasive': None, 'scope': 'Unknown'}, {'code': '9.1', 'score': 'Unknown', 'severity': 'Unknown', 'timing': 'Ongoing', 'titl…	No information available on the threats to the species. Though occurs in areas that have been impacted by pollution and dams.
166211	ACTINOPTERYGII	CYPRINIFORMES	COBITIDAE	Cobitis	sinensis	Least Concern	Freshwater (=Inland waters)	[{'habitat': 'Wetlands (inland) - Permanent Rivers/Streams/Creeks (includes waterfalls)', 'code': '5.1', 'season': None, 'suitability': 'Suitable', 'majorimportance': 'Yes'}]	[]	No information available.
166212	ACTINOPTERYGII	CYPRINIFORMES	BALITORIDAE	Liniparhomaloptera	disparis	Data Deficient	Freshwater (=Inland waters)	[{'habitat': 'Wetlands (inland) - Permanent Rivers/Streams/Creeks (includes waterfalls)', 'code': '5.1', 'season': None, 'suitability': 'Suitable', 'majorimportance': 'Yes'}]	[]	No information available on the threats to the species.
166214	ACTINOPTERYGII	CYPRINIFORMES	CYPRINIDAE	Microphysogobio	kachekensis	Least Concern	Freshwater (=Inland waters)	[{'habitat': 'Wetlands (inland) - Permanent Rivers/Streams/Creeks (includes waterfalls)', 'code': '5.1', 'season': None, 'suitability': 'Suitable', 'majorimportance': 'Yes'}]	[]	No information available on the threats to the species.
166215	ACTINOPTERYGII	CYPRINIFORMES	CYPRINIDAE	Gobiobotia	longibarba	Data Deficient	Freshwater (=Inland waters)	[{'habitat': 'Wetlands (inland) - Permanent Rivers/Streams/Creeks (includes waterfalls)', 'code': '5.1', 'season': None, 'suitability': 'Suitable', 'majorimportance': 'Yes'}]	[]	No information available.
166216	ACTINOPTERYGII	CLUPEIFORMES	ENGRAULIDAE	Coilia	grayii	Least Concern	Freshwater (=Inland waters)|Marine	[{'habitat': 'Wetlands (inland) - Permanent Rivers/Streams/Creeks (includes waterfalls)', 'code': '5.1', 'season': None, 'suitability': 'Suitable', 'majorimportance': 'Yes'}, {'habitat': 'Marine Neritic - Pelagic', 'code': '9.1', 'season': None, 'suitability': 'Suitable', 'majorimportance': 'Yes'}, {'habitat': 'Marine Neritic - Estuaries', 'code': '9.10', 'season': None, 'suitability': 'Suitable'…	[{'code': '5.4', 'score': 'Unknown', 'severity': 'Unknown', 'timing': 'Ongoing', 'title': 'Fishing & harvesting aquatic resources', 'invasive': None, 'scope': 'Majority (50-90%)'}, {'code': '5.4.3', 'score': 'Unknown', 'severity': 'Unknown', 'timing': 'Ongoing', 'title': 'Unintentional effects: (subsistence/small scale) [harvest]', 'invasive': None, 'scope': 'Majority (50-90%)'}, {'code': '9.1', …	<span style="">Pollution and large scale overfishing are amongst the threats to this species.</span>
166442	ACTINOPTERYGII	CLUPEIFORMES	CLUPEIDAE	Tenualosa	ilisha	Least Concern	Freshwater (=Inland waters)|Marine	[{'habitat': 'Wetlands (inland) - Permanent Rivers/Streams/Creeks (includes waterfalls)', 'code': '5.1', 'season': 'breeding', 'suitability': 'Suitable', 'majorimportance': 'Yes'}, {'habitat': 'Marine Neritic - Pelagic', 'code': '9.1', 'season': 'non-breeding', 'suitability': 'Suitable', 'majorimportance': 'Yes'}]	[{'code': '5.4', 'score': 'Medium Impact: 7', 'severity': 'Slow, Significant Declines', 'timing': 'Ongoing', 'title': 'Fishing & harvesting aquatic resources', 'invasive': None, 'scope': 'Whole (>90%)'}, {'code': '5.4.1', 'score': 'Medium Impact: 7', 'severity': 'Slow, Significant Declines', 'timing': 'Ongoing', 'title': 'Intentional use: (subsistence/small scale) [harvest]', 'invasive': None, 's…	Previous Assessment<br/><br/>Catches in India have declined rapidly, and declines have also been reported from Iraq and Bangladesh. Declines are thought to be the result of over-fishing, industrial pollution, which causes large-scale mortality of fish eggs and larvae, and especially dams, such as the Farakka barrage in the Ganges River) which impact the species spawning migrations (Rahman 2006).&…
166446	ACTINOPTERYGII	SILURIFORMES	ARIIDAE	Arius	arius	Least Concern	Freshwater (=Inland waters)|Marine	[{'habitat': 'Marine Oceanic - Epipelagic (0-200m)', 'code': '10.1', 'season': None, 'suitability': 'Suitable', 'majorimportance': 'Yes'}, {'habitat': 'Wetlands (inland) - Permanent Rivers/Streams/Creeks (includes waterfalls)', 'code': '5.1', 'season': None, 'suitability': 'Suitable', 'majorimportance': 'No'}, {'habitat': 'Wetlands (inland) - Permanent Saline, Brackish or Alkaline Lakes', 'code':…	[]	No information available.
166466	ACTINOPTERYGII	CYPRINIFORMES	COBITIDAE	Acantopsis	choirorhynchos	Least Concern	Freshwater (=Inland waters)	[{'habitat': 'Wetlands (inland) - Permanent Rivers/Streams/Creeks (includes waterfalls)', 'code': '5.1', 'season': None, 'suitability': 'Suitable', 'majorimportance': 'Yes'}]	[]	No information available.
166518	ACTINOPTERYGII	CYPRINIFORMES	BALITORIDAE	Nemacheilus	doonensis	Data Deficient	Freshwater (=Inland waters)	[{'habitat': 'Wetlands (inland) - Permanent Rivers/Streams/Creeks (includes waterfalls)', 'code': '5.1', 'season': None, 'suitability': 'Suitable', 'majorimportance': 'Yes'}]	[]	No information is available.
166587	ACTINOPTERYGII	SILURIFORMES	SISORIDAE	Exostoma	berdmorei	Data Deficient	Freshwater (=Inland waters)	[{'habitat': 'Wetlands (inland) - Permanent Rivers/Streams/Creeks (includes waterfalls)', 'code': '5.1', 'season': None, 'suitability': 'Suitable', 'majorimportance': 'Yes'}]	[]	The threats to this species are unknown, since there is no information on the biology of this species and therefore the impact of potential threats (especially those of an anthropogenic nature) remains unknown. Being a hillstream species, this species is expected to be vulnerable to&#160;anthropogenic&#160;habitat disturbance (e.g. siltation caused by deforestation).
166598	ACTINOPTERYGII	PERCIFORMES	GOBIIDAE	Drombus	globiceps	Least Concern	Freshwater (=Inland waters)|Marine	[{'habitat': 'Marine Oceanic - Epipelagic (0-200m)', 'code': '10.1', 'season': None, 'suitability': 'Suitable', 'majorimportance': 'Yes'}, {'habitat': 'Wetlands (inland) - Permanent Rivers/Streams/Creeks (includes waterfalls)', 'code': '5.1', 'season': None, 'suitability': 'Suitable', 'majorimportance': 'Yes'}, {'habitat': 'Marine Neritic - Estuaries', 'code': '9.10', 'season': None, 'suitability…	[]	<p>No information available on the threats to the species. <br/></p>
166853	ACTINOPTERYGII	CYPRINIFORMES	CYPRINIDAE	Hemiculter	elongatus	Data Deficient	Freshwater (=Inland waters)	[{'habitat': 'Wetlands (inland) - Seasonal/Intermittent Freshwater Marshes/Pools (under 8ha)', 'code': '5.8', 'season': None, 'suitability': 'Suitable', 'majorimportance': 'Yes'}]	[]	Without greater information on the species current distribution and ecology, nothing can be inferred of the threats to the species.
166857	ACTINOPTERYGII	CYPRINIFORMES	CYPRINIDAE	Placocheilus	caudofasciatus	Least Concern	Freshwater (=Inland waters)	[{'habitat': 'Wetlands (inland) - Permanent Rivers/Streams/Creeks (includes waterfalls)', 'code': '5.1', 'season': None, 'suitability': 'Suitable', 'majorimportance': 'Yes'}]	[{'code': '1.2', 'score': 'Unknown', 'severity': 'Unknown', 'timing': 'Ongoing', 'title': 'Commercial & industrial areas', 'invasive': None, 'scope': 'Majority (50-90%)'}, {'code': '5.4', 'score': 'Unknown', 'severity': 'Unknown', 'timing': 'Ongoing', 'title': 'Fishing & harvesting aquatic resources', 'invasive': None, 'scope': 'Majority (50-90%)'}, {'code': '5.4.1', 'score': 'Unknown', 'severity…	No information available, however the species is likely to be impacted in parts of its range by overfishing, pollution, and changes to flow regimes.
166858	ACTINOPTERYGII	CYPRINIFORMES	CYPRINIDAE	Hainania	serrata	Data Deficient	Freshwater (=Inland waters)	[{'habitat': 'Wetlands (inland) - Permanent Rivers/Streams/Creeks (includes waterfalls)', 'code': '5.1', 'season': None, 'suitability': 'Suitable', 'majorimportance': 'Yes'}]	[{'code': '1.2', 'score': 'Unknown', 'severity': 'Unknown', 'timing': 'Ongoing', 'title': 'Commercial & industrial areas', 'invasive': None, 'scope': 'Unknown'}, {'code': '7.2', 'score': 'Unknown', 'severity': 'Unknown', 'timing': 'Ongoing', 'title': 'Dams & water management/use', 'invasive': None, 'scope': 'Unknown'}, {'code': '7.2.11', 'score': 'Unknown', 'severity': 'Unknown', 'timing': 'Ongoi…	The construction of water irrigation, abstraction, and hydropower projects has been very widespread in the southern regions of China and this has led to the alteration of riverine environments, which may also affect the population dynamics of this species. Harm done by poison, explosive and electricity fishing must not be under estimated (Wang 1998).
166861	ACTINOPTERYGII	CYPRINIFORMES	CYPRINIDAE	Sinibrama	melrosei	Data Deficient	Freshwater (=Inland waters)	[{'habitat': 'Wetlands (inland) - Permanent Rivers/Streams/Creeks (includes waterfalls)', 'code': '5.1', 'season': None, 'suitability': 'Suitable', 'majorimportance': 'Yes'}]	[{'code': '7.3', 'score': 'Unknown', 'severity': 'Unknown', 'timing': 'Ongoing', 'title': 'Other ecosystem modifications', 'invasive': None, 'scope': 'Majority (50-90%)'}, {'code': '9.1', 'score': 'Unknown', 'severity': 'Unknown', 'timing': 'Ongoing', 'title': 'Domestic & urban waste water', 'invasive': None, 'scope': 'Majority (50-90%)'}, {'code': '9.1.3', 'score': 'Unknown', 'severity': 'Unknow…	Anthropogenic modification of river morphology impacts this species by reducing or interrupting fast water flow. Logging, deforestation and agriculture occur in the area, with associated impacts on the aquatic environment expected.
166864	ACTINOPTERYGII	CYPRINIFORMES	CYPRINIDAE	Rasbora	trilineata	Least Concern	Freshwater (=Inland waters)	[{'habitat': 'Forest - Subtropical/Tropical Swamp', 'code': '1.8', 'season': None, 'suitability': 'Suitable', 'majorimportance': 'Yes'}, {'habitat': 'Wetlands (inland) - Permanent Rivers/Streams/Creeks (includes waterfalls)', 'code': '5.1', 'season': None, 'suitability': 'Suitable', 'majorimportance': 'Yes'}, {'habitat': 'Wetlands (inland) - Seasonal/Intermittent Freshwater Marshes/Pools (under 8…	[{'code': '5.3', 'score': 'Unknown', 'severity': 'Unknown', 'timing': 'Ongoing', 'title': 'Logging & wood harvesting', 'invasive': None, 'scope': 'Majority (50-90%)'}, {'code': '5.3.5', 'score': 'Unknown', 'severity': 'Unknown', 'timing': 'Ongoing', 'title': 'Motivation Unknown/Unrecorded', 'invasive': None, 'scope': 'Majority (50-90%)'}, {'code': '9.1', 'score': 'Unknown', 'severity': 'Unknown',…	Habitat degradation from wetland reclamation and pollution are potential threats to this species.
166865	ACTINOPTERYGII	CYPRINIFORMES	CYPRINIDAE	Onychostoma	elongatum	Data Deficient	Freshwater (=Inland waters)	[{'habitat': 'Wetlands (inland) - Permanent Rivers/Streams/Creeks (includes waterfalls)', 'code': '5.1', 'season': None, 'suitability': 'Suitable', 'majorimportance': 'Yes'}]	[]	No information available.
166870	ACTINOPTERYGII	SILURIFORMES	SISORIDAE	Pareuchiloglanis	macrotrema	Data Deficient	Freshwater (=Inland waters)	[{'habitat': 'Artificial/Aquatic - Seasonally Flooded Agricultural Land', 'code': '15.8', 'season': None, 'suitability': 'Unknown', 'majorimportance': None}, {'habitat': 'Wetlands (inland) - Permanent Rivers/Streams/Creeks (includes waterfalls)', 'code': '5.1', 'season': None, 'suitability': 'Suitable', 'majorimportance': 'Yes'}]	[]	The species is likely to be impacted by pollution, however there is now information available.
166875	ACTINOPTERYGII	CYPRINIFORMES	BALITORIDAE	Vanmanenia	tetraloba	Data Deficient	Freshwater (=Inland waters)	[{'habitat': 'Wetlands (inland) - Permanent Rivers/Streams/Creeks (includes waterfalls)', 'code': '5.1', 'season': None, 'suitability': 'Suitable', 'majorimportance': 'Yes'}]	[]	The threats to this species are unknown, since there is no information on the biology of this species and therefore the impact of potential threats (especially those of an anthropogenic nature) remains unknown. Being a hillstream species, this species is expected to be vulnerable to anthropogenic habitat disturbance (e.g. siltation caused by deforestation).
166876	ACTINOPTERYGII	CYPRINIFORMES	CYPRINIDAE	Spinibarbus	hollandi	Data Deficient	Freshwater (=Inland waters)	[{'habitat': 'Wetlands (inland) - Permanent Rivers/Streams/Creeks (includes waterfalls)', 'code': '5.1', 'season': None, 'suitability': 'Suitable', 'majorimportance': 'Yes'}, {'habitat': 'Wetlands (inland) - Permanent Freshwater Lakes (over 8ha)', 'code': '5.5', 'season': None, 'suitability': 'Suitable', 'majorimportance': 'No'}, {'habitat': 'Wetlands (inland) - Permanent Freshwater Marshes/Pools…	[{'code': '5.4', 'score': 'Unknown', 'severity': 'Unknown', 'timing': 'Ongoing', 'title': 'Fishing & harvesting aquatic resources', 'invasive': None, 'scope': 'Majority (50-90%)'}, {'code': '5.4.1', 'score': 'Unknown', 'severity': 'Unknown', 'timing': 'Ongoing', 'title': 'Intentional use: (subsistence/small scale) [harvest]', 'invasive': None, 'scope': 'Majority (50-90%)'}, {'code': '5.4.2', 'sco…	In Viet Nam populations have declined due to over harvesting. It is also recorded as declining in Hainan due to overfishing. It is used as an indicator for ecologically healthy rivers, so is sensitive to pollution and other impacts. Dams will also reduce the area of suitable spawning areas as they require fast flowing water.
166878	ACTINOPTERYGII	CYPRINIFORMES	CYPRINIDAE	Spinibarbus	denticulatus	Least Concern	Freshwater (=Inland waters)	[{'habitat': 'Artificial/Aquatic - Water Storage Areas (over 8ha)', 'code': '15.1', 'season': None, 'suitability': 'Unknown', 'majorimportance': None}, {'habitat': 'Artificial/Aquatic - Aquaculture Ponds', 'code': '15.3', 'season': None, 'suitability': 'Unknown', 'majorimportance': None}, {'habitat': 'Wetlands (inland) - Permanent Rivers/Streams/Creeks (includes waterfalls)', 'code': '5.1', 'seas…	[{'code': '5.4', 'score': 'Medium Impact: 6', 'severity': 'Slow, Significant Declines', 'timing': 'Ongoing', 'title': 'Fishing & harvesting aquatic resources', 'invasive': None, 'scope': 'Majority (50-90%)'}, {'code': '5.4.1', 'score': 'Medium Impact: 6', 'severity': 'Slow, Significant Declines', 'timing': 'Ongoing', 'title': 'Intentional use: (subsistence/small scale) [harvest]', 'invasive': Non…	The major threats to this species are overfishing and habitat degradation through dam construction and water pollution.
166879	ACTINOPTERYGII	PERCIFORMES	GERREIDAE	Gerres	limbatus	Least Concern	Freshwater (=Inland waters)|Marine	[{'habitat': 'Marine Oceanic - Epipelagic (0-200m)', 'code': '10.1', 'season': None, 'suitability': None, 'majorimportance': None}, {'habitat': 'Wetlands (inland) - Permanent Rivers/Streams/Creeks (includes waterfalls)', 'code': '5.1', 'season': None, 'suitability': None, 'majorimportance': None}]	[{'code': '11.1', 'score': 'No/Negligible Impact: 0', 'severity': None, 'timing': None, 'title': 'Habitat shifting & alteration', 'invasive': None, 'scope': None}, {'code': '11.2', 'score': 'No/Negligible Impact: 0', 'severity': None, 'timing': None, 'title': 'Droughts', 'invasive': None, 'scope': None}, {'code': '11.3', 'score': 'No/Negligible Impact: 0', 'severity': None, 'timing': None, 'title…	There should be no major threats to this very widespread and&#160;ubiquitous&#160;species.
166880	ACTINOPTERYGII	CYPRINIFORMES	CYPRINIDAE	Toxabramis	houdemeri	Least Concern	Freshwater (=Inland waters)	[{'habitat': 'Wetlands (inland) - Permanent Rivers/Streams/Creeks (includes waterfalls)', 'code': '5.1', 'season': None, 'suitability': 'Suitable', 'majorimportance': 'Yes'}, {'habitat': 'Wetlands (inland) - Permanent Freshwater Lakes (over 8ha)', 'code': '5.5', 'season': None, 'suitability': 'Suitable', 'majorimportance': 'No'}]	[]	No information available on the threats to the species.
166883	ACTINOPTERYGII	CYPRINIFORMES	CYPRINIDAE	Opsariichthys	bidens	Least Concern	Freshwater (=Inland waters)	[{'habitat': 'Wetlands (inland) - Permanent Rivers/Streams/Creeks (includes waterfalls)', 'code': '5.1', 'season': None, 'suitability': 'Suitable', 'majorimportance': 'Yes'}]	[{'code': '1.2', 'score': 'Unknown', 'severity': 'Unknown', 'timing': 'Ongoing', 'title': 'Commercial & industrial areas', 'invasive': None, 'scope': 'Unknown'}, {'code': '9.1', 'score': 'Unknown', 'severity': 'Unknown', 'timing': 'Ongoing', 'title': 'Domestic & urban waste water', 'invasive': None, 'scope': 'Unknown'}, {'code': '9.1.1', 'score': 'Unknown', 'severity': 'Unknown', 'timing': 'Ongoi…	The species occurs in areas where freshwater systems are threatened, however the impact of threats on the species is uncertain, and it may be tolerant of some degree of pollution (M. Kottelat pers. comm. 2011).
166886	ACTINOPTERYGII	CYPRINIFORMES	CYPRINIDAE	Hypophthalmichthys	harmandi	Data Deficient	Freshwater (=Inland waters)	[{'habitat': 'Wetlands (inland) - Permanent Rivers/Streams/Creeks (includes waterfalls)', 'code': '5.1', 'season': None, 'suitability': 'Suitable', 'majorimportance': 'Yes'}, {'habitat': 'Wetlands (inland) - Permanent Freshwater Lakes (over 8ha)', 'code': '5.5', 'season': None, 'suitability': 'Suitable', 'majorimportance': 'Yes'}, {'habitat': 'Wetlands (inland) - Permanent Freshwater Marshes/Pool…	[{'code': '5.4', 'score': 'Unknown', 'severity': 'Unknown', 'timing': 'Ongoing', 'title': 'Fishing & harvesting aquatic resources', 'invasive': None, 'scope': 'Majority (50-90%)'}, {'code': '5.4.2', 'score': 'Unknown', 'severity': 'Unknown', 'timing': 'Ongoing', 'title': 'Intentional use: (large scale) [harvest]', 'invasive': None, 'scope': 'Majority (50-90%)'}, {'code': '7.2', 'score': 'Unknown'…	Major threats to <span style="font-style: italic;">Hypophthalmichthys harmandi</span> in its native distribution range are overfishing and river modifications (e.g. dam, dyke and floodgate construction, the conversion of floodplain into agriculture land). In addition, hybridization with <span style="font-style: italic;">H. mollitrix</span> and <span style="font-style: italic;">H. nobilis</span> a…
166887	ACTINOPTERYGII	SILURIFORMES	BAGRIDAE	Hemibagrus	pluriradiatus	Least Concern	Freshwater (=Inland waters)	[{'habitat': 'Wetlands (inland) - Permanent Rivers/Streams/Creeks (includes waterfalls)', 'code': '5.1', 'season': None, 'suitability': 'Suitable', 'majorimportance': 'Yes'}, {'habitat': 'Wetlands (inland) - Permanent Freshwater Lakes (over 8ha)', 'code': '5.5', 'season': None, 'suitability': 'Suitable', 'majorimportance': 'No'}]	[{'code': '5.4', 'score': 'Unknown', 'severity': 'Unknown', 'timing': 'Ongoing', 'title': 'Fishing & harvesting aquatic resources', 'invasive': None, 'scope': 'Majority (50-90%)'}, {'code': '5.4.1', 'score': 'Unknown', 'severity': 'Unknown', 'timing': 'Ongoing', 'title': 'Intentional use: (subsistence/small scale) [harvest]', 'invasive': None, 'scope': 'Majority (50-90%)'}, {'code': '9.2', 'score…	Overfishing and pollution in its suitable habitats are potential threats.
166889	ACTINOPTERYGII	CYPRINIFORMES	COBITIDAE	Cobitis	squataeniatus	Data Deficient	Freshwater (=Inland waters)	[{'habitat': 'Wetlands (inland) - Permanent Rivers/Streams/Creeks (includes waterfalls)', 'code': '5.1', 'season': None, 'suitability': 'Unknown', 'majorimportance': None}]	[{'code': '1.1', 'score': 'Unknown', 'severity': 'Unknown', 'timing': 'Ongoing', 'title': 'Housing & urban areas', 'invasive': None, 'scope': 'Whole (>90%)'}, {'code': '1.3', 'score': 'Unknown', 'severity': 'Unknown', 'timing': 'Ongoing', 'title': 'Tourism & recreation areas', 'invasive': None, 'scope': 'Whole (>90%)'}]	The species may be impacted by tourist and residential developments.
166893	ACTINOPTERYGII	PERCIFORMES	AMBASSIDAE	Ambassis	vachellii	Least Concern	Freshwater (=Inland waters)|Marine	[{'habitat': 'Marine Intertidal - Tidepools', 'code': '12.6', 'season': None, 'suitability': 'Suitable', 'majorimportance': 'Yes'}, {'habitat': 'Marine Intertidal - Mangrove Submerged Roots', 'code': '12.7', 'season': None, 'suitability': 'Suitable', 'majorimportance': 'Yes'}, {'habitat': 'Wetlands (inland) - Permanent Rivers/Streams/Creeks (includes waterfalls)', 'code': '5.1', 'season': None, '…	[]	There are no known major threats to this species. Human disturbance and pollution are possible threats.
166896	ACTINOPTERYGII	SILURIFORMES	SISORIDAE	Glyptothorax	honghensis	Data Deficient	Freshwater (=Inland waters)	[{'habitat': 'Wetlands (inland) - Permanent Rivers/Streams/Creeks (includes waterfalls)', 'code': '5.1', 'season': None, 'suitability': 'Suitable', 'majorimportance': 'Yes'}]	[{'code': '7.3', 'score': 'Unknown', 'severity': 'Unknown', 'timing': 'Ongoing', 'title': 'Other ecosystem modifications', 'invasive': None, 'scope': 'Majority (50-90%)'}, {'code': '9.3', 'score': 'Unknown', 'severity': 'Unknown', 'timing': 'Ongoing', 'title': 'Agricultural & forestry effluents', 'invasive': None, 'scope': 'Majority (50-90%)'}, {'code': '9.3.2', 'score': 'Unknown', 'severity': 'U…	The threats to this species are unknown, since there is no information on the biology of this species and therefore the impact of potential threats (especially those of an anthropogenic nature) remains unknown. Being a hillstream species, this species is expected to be vulnerable to anthropogenic habitat disturbance (e.g. siltation caused by deforestation).
166898	ACTINOPTERYGII	CYPRINIFORMES	CYPRINIDAE	Scaphiodonichthys	macracanthus	Data Deficient	Freshwater (=Inland waters)	[{'habitat': 'Wetlands (inland) - Permanent Rivers/Streams/Creeks (includes waterfalls)', 'code': '5.1', 'season': None, 'suitability': 'Suitable', 'majorimportance': 'Yes'}]	[{'code': '5.4', 'score': 'Unknown', 'severity': 'Unknown', 'timing': 'Ongoing', 'title': 'Fishing & harvesting aquatic resources', 'invasive': None, 'scope': 'Unknown'}, {'code': '5.4.1', 'score': 'Unknown', 'severity': 'Unknown', 'timing': 'Ongoing', 'title': 'Intentional use: (subsistence/small scale) [harvest]', 'invasive': None, 'scope': 'Unknown'}, {'code': '7.2', 'score': 'Unknown', 'sever…	Dam constructions, overfishing and water pollution are major threats to this species.
166901	ACTINOPTERYGII	SILURIFORMES	BAGRIDAE	Hemibagrus	vietnamicus	Data Deficient	Freshwater (=Inland waters)	[{'habitat': 'Wetlands (inland) - Permanent Rivers/Streams/Creeks (includes waterfalls)', 'code': '5.1', 'season': None, 'suitability': 'Suitable', 'majorimportance': 'Yes'}]	[{'code': '5.4', 'score': 'Unknown', 'severity': 'Unknown', 'timing': 'Ongoing', 'title': 'Fishing & harvesting aquatic resources', 'invasive': None, 'scope': 'Minority (<50%)'}, {'code': '5.4.1', 'score': 'Unknown', 'severity': 'Unknown', 'timing': 'Ongoing', 'title': 'Intentional use: (subsistence/small scale) [harvest]', 'invasive': None, 'scope': 'Minority (<50%)'}, {'code': '5.4.2', 'score':…	This species is heavily fished as a food species throughout much of its range, and it is expected that overfishing may pose a considerable threat to its population (particularly in the Red River drainage). However, this awaits verification from empirical data.
166903	ACTINOPTERYGII	CYPRINIFORMES	CYPRINIDAE	Semilabeo	notabilis	Data Deficient	Freshwater (=Inland waters)	[{'habitat': 'Wetlands (inland) - Permanent Rivers/Streams/Creeks (includes waterfalls)', 'code': '5.1', 'season': None, 'suitability': 'Suitable', 'majorimportance': 'Yes'}]	[]	No information available on the threats to the species.
166907	ACTINOPTERYGII	CYPRINIFORMES	BALITORIDAE	Beaufortia	leveretti	Data Deficient	Freshwater (=Inland waters)	[{'habitat': 'Wetlands (inland) - Permanent Rivers/Streams/Creeks (includes waterfalls)', 'code': '5.1', 'season': None, 'suitability': 'Suitable', 'majorimportance': 'Yes'}]	[{'code': '2.1', 'score': 'Unknown', 'severity': 'Unknown', 'timing': 'Ongoing', 'title': 'Annual & perennial non-timber crops', 'invasive': None, 'scope': 'Unknown'}, {'code': '2.1.4', 'score': 'Unknown', 'severity': 'Unknown', 'timing': 'Ongoing', 'title': 'Scale Unknown/Unrecorded', 'invasive': None, 'scope': 'Unknown'}, {'code': '5.3', 'score': 'Unknown', 'severity': 'Unknown', 'timing': 'Ong…	Anthropogenic modification of river morphology impacts this species by reducing or interrupting water flow. Logging, deforestation and agriculture occurs throughout the species range, with associated impacts on the aquatic environment expected (M. Kottelat pers. comm. 2011).
166909	ACTINOPTERYGII	CYPRINIFORMES	CYPRINIDAE	Folifer	brevifilis	Data Deficient	Freshwater (=Inland waters)	[{'habitat': 'Wetlands (inland) - Permanent Rivers/Streams/Creeks (includes waterfalls)', 'code': '5.1', 'season': None, 'suitability': 'Suitable', 'majorimportance': 'Yes'}]	[{'code': '5.4', 'score': 'Unknown', 'severity': 'Unknown', 'timing': 'Ongoing', 'title': 'Fishing & harvesting aquatic resources', 'invasive': None, 'scope': 'Majority (50-90%)'}, {'code': '5.4.1', 'score': 'Unknown', 'severity': 'Unknown', 'timing': 'Ongoing', 'title': 'Intentional use: (subsistence/small scale) [harvest]', 'invasive': None, 'scope': 'Majority (50-90%)'}, {'code': '7.2', 'score…	The species may be impacted in parts of its range by pollution and overfishing, and due to its migratory nature also by dams and flow alterations.
166912	ACTINOPTERYGII	CYPRINIFORMES	CYPRINIDAE	Parazacco	spilurus	Data Deficient	Freshwater (=Inland waters)	[{'habitat': 'Wetlands (inland) - Permanent Rivers/Streams/Creeks (includes waterfalls)', 'code': '5.1', 'season': None, 'suitability': 'Suitable', 'majorimportance': 'Yes'}]	[{'code': '5.4', 'score': 'Unknown', 'severity': 'Unknown', 'timing': 'Ongoing', 'title': 'Fishing & harvesting aquatic resources', 'invasive': None, 'scope': 'Unknown'}, {'code': '5.4.1', 'score': 'Unknown', 'severity': 'Unknown', 'timing': 'Ongoing', 'title': 'Intentional use: (subsistence/small scale) [harvest]', 'invasive': None, 'scope': 'Unknown'}, {'code': '7.2', 'score': 'Unknown', 'sever…	Major threats to <span style="font-style: italic;">Parazacco spilurus</span> are destructive fishing practices and river modification (e.g. dam construction) (Wang 1998).
166914	ACTINOPTERYGII	CYPRINIFORMES	CYPRINIDAE	Barbonymus	gonionotus	Least Concern	Freshwater (=Inland waters)	[{'habitat': 'Artificial/Aquatic - Water Storage Areas (over 8ha)', 'code': '15.1', 'season': None, 'suitability': 'Unknown', 'majorimportance': None}, {'habitat': 'Artificial/Aquatic - Seasonally Flooded Agricultural Land', 'code': '15.8', 'season': None, 'suitability': 'Suitable', 'majorimportance': 'Yes'}, {'habitat': 'Wetlands (inland) - Permanent Rivers/Streams/Creeks (includes waterfalls)',…	[{'code': '5.4', 'score': 'Unknown', 'severity': 'Unknown', 'timing': 'Ongoing', 'title': 'Fishing & harvesting aquatic resources', 'invasive': None, 'scope': 'Unknown'}, {'code': '5.4.1', 'score': 'Unknown', 'severity': 'Unknown', 'timing': 'Ongoing', 'title': 'Intentional use: (subsistence/small scale) [harvest]', 'invasive': None, 'scope': 'Unknown'}, {'code': '5.4.2', 'score': 'Unknown', 'sev…	Not likely to have significant threats across its range, but many be impacted locally by fisheries.
166915	ACTINOPTERYGII	CYPRINIFORMES	CYPRINIDAE	Onychostoma	lepturum	Data Deficient	Freshwater (=Inland waters)	[{'habitat': 'Wetlands (inland) - Permanent Rivers/Streams/Creeks (includes waterfalls)', 'code': '5.1', 'season': None, 'suitability': 'Suitable', 'majorimportance': 'Yes'}]	[]	No information available. It is likely that the species' habitat is impacted by pollution from a range of sources, dam development and other infrastructure works, and that the species itself may be overfished.
166916	ACTINOPTERYGII	CYPRINIFORMES	CYPRINIDAE	Saurogobio	immaculatus	Data Deficient	Freshwater (=Inland waters)	[{'habitat': 'Wetlands (inland) - Permanent Rivers/Streams/Creeks (includes waterfalls)', 'code': '5.1', 'season': None, 'suitability': 'Suitable', 'majorimportance': 'Yes'}]	[{'code': '7.2', 'score': 'Unknown', 'severity': 'Unknown', 'timing': 'Ongoing', 'title': 'Dams & water management/use', 'invasive': None, 'scope': 'Majority (50-90%)'}, {'code': '7.2.11', 'score': 'Unknown', 'severity': 'Unknown', 'timing': 'Ongoing', 'title': 'Dams (size unknown)', 'invasive': None, 'scope': 'Majority (50-90%)'}, {'code': '9.1', 'score': 'Unknown', 'severity': 'Unknown', 'timin…	No information available on direct threats to the species, however impacts from pollution and dams can be expected.
166917	ACTINOPTERYGII	SILURIFORMES	SISORIDAE	Bagarius	rutilus	Data Deficient	Freshwater (=Inland waters)	[{'habitat': 'Wetlands (inland) - Permanent Rivers/Streams/Creeks (includes waterfalls)', 'code': '5.1', 'season': None, 'suitability': 'Suitable', 'majorimportance': 'Yes'}]	[{'code': '5.4', 'score': 'Medium Impact: 6', 'severity': 'Slow, Significant Declines', 'timing': 'Ongoing', 'title': 'Fishing & harvesting aquatic resources', 'invasive': None, 'scope': 'Majority (50-90%)'}, {'code': '5.4.1', 'score': 'Medium Impact: 6', 'severity': 'Slow, Significant Declines', 'timing': 'Ongoing', 'title': 'Intentional use: (subsistence/small scale) [harvest]', 'invasive': Non…	Populations have declined as a result of overfishing and the loss and degradation of habitats, including dam construction. Nguyen (2008) found that the species is likely to be impacted by the construction of the Trung Son dam on the Ma River in northern Viet Nam.
166921	ACTINOPTERYGII	CYPRINIFORMES	CYPRINIDAE	Pseudohemiculter	hainanensis	Least Concern	Freshwater (=Inland waters)	[{'habitat': 'Wetlands (inland) - Permanent Rivers/Streams/Creeks (includes waterfalls)', 'code': '5.1', 'season': None, 'suitability': 'Suitable', 'majorimportance': 'Yes'}]	[]	No information available on the threats to the species.
166922	ACTINOPTERYGII	CYPRINIFORMES	BALITORIDAE	Sinogastromyzon	rugocauda	Data Deficient	Freshwater (=Inland waters)	[{'habitat': 'Wetlands (inland) - Permanent Rivers/Streams/Creeks (includes waterfalls)', 'code': '5.1', 'season': None, 'suitability': 'Suitable', 'majorimportance': 'Yes'}]	[{'code': '6.3', 'score': 'Unknown', 'severity': 'Unknown', 'timing': 'Ongoing', 'title': 'Work & other activities', 'invasive': None, 'scope': 'Unknown'}, {'code': '9.1', 'score': 'Unknown', 'severity': 'Unknown', 'timing': 'Ongoing', 'title': 'Domestic & urban waste water', 'invasive': None, 'scope': 'Unknown'}, {'code': '9.1.1', 'score': 'Unknown', 'severity': 'Unknown', 'timing': 'Ongoing', '…	<p><span lang="EN-GB">No specific threat known but logging, deforestation and agriculture occurs in the area, with associated impacts on the aquatic environment expected (M. Kottelat pers. comm. 2011).</p>
166924	ACTINOPTERYGII	CYPRINIFORMES	CYPRINIDAE	Pseudolaubuca	sinensis	Least Concern	Freshwater (=Inland waters)	[{'habitat': 'Wetlands (inland) - Permanent Rivers/Streams/Creeks (includes waterfalls)', 'code': '5.1', 'season': None, 'suitability': 'Suitable', 'majorimportance': 'Yes'}]	[]	No major widespread threats to the species are known.
166930	ACTINOPTERYGII	CYPRINIFORMES	CYPRINIDAE	Squaliobarbus	curriculus	Data Deficient	Freshwater (=Inland waters)	[{'habitat': 'Wetlands (inland) - Permanent Rivers/Streams/Creeks (includes waterfalls)', 'code': '5.1', 'season': None, 'suitability': 'Suitable', 'majorimportance': 'Yes'}]	[{'code': '5.4', 'score': 'Unknown', 'severity': 'Unknown', 'timing': 'Ongoing', 'title': 'Fishing & harvesting aquatic resources', 'invasive': None, 'scope': 'Majority (50-90%)'}, {'code': '5.4.1', 'score': 'Unknown', 'severity': 'Unknown', 'timing': 'Ongoing', 'title': 'Intentional use: (subsistence/small scale) [harvest]', 'invasive': None, 'scope': 'Majority (50-90%)'}, {'code': '5.4.2', 'sco…	Major threats to this species are overfishing and human-induced alteration of riverine environment.
166934	ACTINOPTERYGII	CYPRINIFORMES	CYPRINIDAE	Spinibarbus	ovalius	Data Deficient	Freshwater (=Inland waters)	[{'habitat': 'Wetlands (inland) - Permanent Rivers/Streams/Creeks (includes waterfalls)', 'code': '5.1', 'season': None, 'suitability': 'Suitable', 'majorimportance': 'Yes'}]	[{'code': '7.2', 'score': 'Unknown', 'severity': 'Unknown', 'timing': 'Ongoing', 'title': 'Dams & water management/use', 'invasive': None, 'scope': 'Unknown'}, {'code': '7.2.10', 'score': 'Unknown', 'severity': 'Unknown', 'timing': 'Ongoing', 'title': 'Large dams', 'invasive': None, 'scope': 'Unknown'}, {'code': '9.3', 'score': 'Unknown', 'severity': 'Unknown', 'timing': 'Ongoing', 'title': 'Agri…	The species is likely to be impacted by a range of threats, including sedimentation, and possibly impacts from the Gam River hydroelectric dam that began construction in 2002, after the description of this species.
166936	ACTINOPTERYGII	CYPRINIFORMES	CYPRINIDAE	Barbodes	semifasciolatus	Least Concern	Freshwater (=Inland waters)	[{'habitat': 'Wetlands (inland) - Permanent Rivers/Streams/Creeks (includes waterfalls)', 'code': '5.1', 'season': None, 'suitability': 'Suitable', 'majorimportance': 'Yes'}, {'habitat': 'Wetlands (inland) - Permanent Freshwater Lakes (over 8ha)', 'code': '5.5', 'season': None, 'suitability': 'Suitable', 'majorimportance': 'No'}]	[{'code': '1.2', 'score': 'Unknown', 'severity': 'Unknown', 'timing': 'Ongoing', 'title': 'Commercial & industrial areas', 'invasive': None, 'scope': 'Unknown'}, {'code': '7.2', 'score': 'Unknown', 'severity': 'Unknown', 'timing': 'Ongoing', 'title': 'Dams & water management/use', 'invasive': None, 'scope': 'Unknown'}, {'code': '7.2.11', 'score': 'Unknown', 'severity': 'Unknown', 'timing': 'Ongoi…	The species occurs in areas that are impacted by pollution and dams, however there is limited information available. In Taiwan, its populations have declined or been locally extirpated due to environmental deterioration (water pollution and habitat destruction), and the introduction of exotic fishes (Lai<span style="font-style: italic;"> et al. </span>2008).
166939	ACTINOPTERYGII	SILURIFORMES	CRANOGLANIDIDAE	Cranoglanis	henrici	Least Concern	Freshwater (=Inland waters)	[{'habitat': 'Wetlands (inland) - Permanent Rivers/Streams/Creeks (includes waterfalls)', 'code': '5.1', 'season': None, 'suitability': 'Suitable', 'majorimportance': 'Yes'}]	[{'code': '5.4', 'score': 'Low Impact: 4', 'severity': 'Negligible declines', 'timing': 'Ongoing', 'title': 'Fishing & harvesting aquatic resources', 'invasive': None, 'scope': 'Minority (<50%)'}, {'code': '5.4.1', 'score': 'Low Impact: 4', 'severity': 'Negligible declines', 'timing': 'Ongoing', 'title': 'Intentional use: (subsistence/small scale) [harvest]', 'invasive': None, 'scope': 'Minority …	Main threat to this species are overfishing. River modification (e.g. dam construction, straightening and dredging of river channels) causes habitat degradation but it is not clear it is having a significant impact on populations.
166940	ACTINOPTERYGII	PLEURONECTIFORMES	CYNOGLOSSIDAE	Cynoglossus	trigrammus	Least Concern	Freshwater (=Inland waters)|Marine	[{'habitat': 'Wetlands (inland) - Permanent Rivers/Streams/Creeks (includes waterfalls)', 'code': '5.1', 'season': None, 'suitability': 'Suitable', 'majorimportance': 'Yes'}, {'habitat': 'Marine Neritic - Estuaries', 'code': '9.10', 'season': None, 'suitability': 'Suitable', 'majorimportance': 'Yes'}, {'habitat': 'Marine Neritic - Subtidal Sandy', 'code': '9.4', 'season': None, 'suitability': 'Su…	[]
166943	ACTINOPTERYGII	CYPRINIFORMES	CYPRINIDAE	Onychostoma	lini	Data Deficient	Freshwater (=Inland waters)	[{'habitat': 'Wetlands (inland) - Permanent Rivers/Streams/Creeks (includes waterfalls)', 'code': '5.1', 'season': None, 'suitability': 'Suitable', 'majorimportance': 'Yes'}, {'habitat': 'Wetlands (inland) - Permanent Freshwater Lakes (over 8ha)', 'code': '5.5', 'season': None, 'suitability': 'Suitable', 'majorimportance': 'Yes'}]	[{'code': '7.2', 'score': 'Unknown', 'severity': 'Unknown', 'timing': 'Ongoing', 'title': 'Dams & water management/use', 'invasive': None, 'scope': 'Majority (50-90%)'}, {'code': '7.2.11', 'score': 'Unknown', 'severity': 'Unknown', 'timing': 'Ongoing', 'title': 'Dams (size unknown)', 'invasive': None, 'scope': 'Majority (50-90%)'}, {'code': '7.3', 'score': 'Unknown', 'severity': 'Unknown', 'timin…	Anthropogenic modification of river morphology impacts this species by reducing or interrupting fast water flow. Logging, deforestation and agriculture occurs in the area, with associated impacts on the aquatic environment expected.
166944	ACTINOPTERYGII	MUGILIFORMES	MUGILIDAE	Moolgarda	perusii	Least Concern	Freshwater (=Inland waters)|Marine	[{'habitat': 'Marine Intertidal - Mud Flats and Salt Flats', 'code': '12.4', 'season': None, 'suitability': 'Suitable', 'majorimportance': None}, {'habitat': 'Wetlands (inland) - Permanent Rivers/Streams/Creeks (includes waterfalls)', 'code': '5.1', 'season': None, 'suitability': 'Suitable', 'majorimportance': None}, {'habitat': 'Marine Neritic - Estuaries', 'code': '9.10', 'season': None, 'suita…	[]	There are no major threats to this species across its range.
166947	ACTINOPTERYGII	TETRAODONTIFORMES	TETRAODONTIDAE	Lagocephalus	sceleratus	Least Concern	Freshwater (=Inland waters)|Marine	[{'habitat': 'Marine Oceanic - Epipelagic (0-200m)', 'code': '10.1', 'season': None, 'suitability': 'Suitable', 'majorimportance': None}, {'habitat': 'Marine Neritic - Subtidal Rock and Rocky Reefs', 'code': '9.2', 'season': None, 'suitability': 'Suitable', 'majorimportance': None}, {'habitat': 'Marine Neritic - Subtidal Sandy', 'code': '9.4', 'season': None, 'suitability': 'Suitable', 'majorimpo…	[{'code': '1.1', 'score': 'Unknown', 'severity': 'Unknown', 'timing': 'Ongoing', 'title': 'Housing & urban areas', 'invasive': None, 'scope': 'Unknown'}, {'code': '11.1', 'score': 'Unknown', 'severity': 'Unknown', 'timing': 'Ongoing', 'title': 'Habitat shifting & alteration', 'invasive': None, 'scope': 'Unknown'}, {'code': '11.4', 'score': 'Unknown', 'severity': 'Unknown', 'timing': 'Ongoing', 't…	There are no major threats known to this species. It is taken incidentally in long-line and trawl fisheries, and is of little value. Due to its affinity with seagrass beds, especially as spawning grounds, this species may be undergoing population decline due to loss of habitat. One-third of global seagrass species are currently experiencing population declines, and 21% of globally assessed seagra…
166950	ACTINOPTERYGII	CYPRINIFORMES	CYPRINIDAE	Rasbora	steineri	Least Concern	Freshwater (=Inland waters)	[{'habitat': 'Artificial/Aquatic - Canals and Drainage Channels, Ditches', 'code': '15.9', 'season': None, 'suitability': 'Marginal', 'majorimportance': None}, {'habitat': 'Wetlands (inland) - Permanent Rivers/Streams/Creeks (includes waterfalls)', 'code': '5.1', 'season': None, 'suitability': 'Suitable', 'majorimportance': 'Yes'}]	[]	No information available on the threats to the species.
166951	ACTINOPTERYGII	SILURIFORMES	SILURIDAE	Silurus	asotus	Least Concern	Freshwater (=Inland waters)	[{'habitat': 'Artificial/Aquatic - Water Storage Areas (over 8ha)', 'code': '15.1', 'season': None, 'suitability': 'Suitable', 'majorimportance': 'No'}, {'habitat': 'Wetlands (inland) - Permanent Rivers/Streams/Creeks (includes waterfalls)', 'code': '5.1', 'season': None, 'suitability': 'Suitable', 'majorimportance': 'Yes'}, {'habitat': 'Wetlands (inland) - Permanent Inland Deltas', 'code': '5.13…	[]	No information available on the threats to the species.
166958	ACTINOPTERYGII	CYPRINIFORMES	CYPRINIDAE	Parazacco	fasciatus	Least Concern	Freshwater (=Inland waters)	[{'habitat': 'Wetlands (inland) - Permanent Rivers/Streams/Creeks (includes waterfalls)', 'code': '5.1', 'season': None, 'suitability': 'Suitable', 'majorimportance': 'Yes'}]	[]	<p>No information available on the threats to the species.&#160;</p>
166962	ACTINOPTERYGII	CYPRINIFORMES	CYPRINIDAE	Rhodeus	spinalis	Least Concern	Freshwater (=Inland waters)	[{'habitat': 'Wetlands (inland) - Permanent Rivers/Streams/Creeks (includes waterfalls)', 'code': '5.1', 'season': None, 'suitability': 'Suitable', 'majorimportance': 'Yes'}, {'habitat': 'Wetlands (inland) - Permanent Freshwater Marshes/Pools (under 8ha)', 'code': '5.7', 'season': None, 'suitability': 'Suitable', 'majorimportance': 'No'}]	[{'code': '9.1', 'score': 'Unknown', 'severity': 'Unknown', 'timing': 'Ongoing', 'title': 'Domestic & urban waste water', 'invasive': None, 'scope': 'Minority (<50%)'}, {'code': '9.1.1', 'score': 'Unknown', 'severity': 'Unknown', 'timing': 'Ongoing', 'title': 'Sewage', 'invasive': None, 'scope': 'Minority (<50%)'}, {'code': '9.2', 'score': 'Unknown', 'severity': 'Unknown', 'timing': 'Ongoing', 't…	Locally threatened by water pollution, weed clearing, and stocking of predatory fish.
166963	ACTINOPTERYGII	PERCIFORMES	GOBIIDAE	Taenioides	gracilis	Least Concern	Freshwater (=Inland waters)|Marine	[{'habitat': 'Wetlands (inland) - Permanent Rivers/Streams/Creeks (includes waterfalls)', 'code': '5.1', 'season': None, 'suitability': 'Suitable', 'majorimportance': 'No'}, {'habitat': 'Marine Neritic - Estuaries', 'code': '9.10', 'season': None, 'suitability': 'Suitable', 'majorimportance': 'No'}]	[]	The species may be impacted locally by habitat loss and pollution, but there is no information available to confirm this. There are no major widespread threats to this species.
166967	ACTINOPTERYGII	CYPRINIFORMES	BALITORIDAE	Sinogastromyzon	tonkinensis	Data Deficient	Freshwater (=Inland waters)	[{'habitat': 'Wetlands (inland) - Permanent Rivers/Streams/Creeks (includes waterfalls)', 'code': '5.1', 'season': None, 'suitability': 'Suitable', 'majorimportance': 'Yes'}]	[]	The threats are unknown.
166970	ACTINOPTERYGII	CYPRINIFORMES	COBITIDAE	Cobitis	ylengensis	Data Deficient	Freshwater (=Inland waters)	[{'habitat': 'Wetlands (inland) - Permanent Rivers/Streams/Creeks (includes waterfalls)', 'code': '5.1', 'season': None, 'suitability': 'Suitable', 'majorimportance': 'Yes'}]	[]	Nothing is known of threats to the species.
166972	ACTINOPTERYGII	CYPRINIFORMES	CYPRINIDAE	Poropuntius	krempfi	Data Deficient	Freshwater (=Inland waters)	[{'habitat': 'Wetlands (inland) - Permanent Rivers/Streams/Creeks (includes waterfalls)', 'code': '5.1', 'season': None, 'suitability': 'Suitable', 'majorimportance': 'Yes'}]	[{'code': '5.4', 'score': 'Medium Impact: 6', 'severity': 'Slow, Significant Declines', 'timing': 'Ongoing', 'title': 'Fishing & harvesting aquatic resources', 'invasive': None, 'scope': 'Majority (50-90%)'}, {'code': '5.4.1', 'score': 'Medium Impact: 6', 'severity': 'Slow, Significant Declines', 'timing': 'Ongoing', 'title': 'Intentional use: (subsistence/small scale) [harvest]', 'invasive': Non…	<p> </p>Anthropogenic modification of river morphology impacts this species by reducing or interrupting fast water flow. The species may be subject to overfishing. Logging, deforestation and agriculture occurs in the area, with associated impacts on the aquatic environment expected (M. Kottelat pers. comm. 2011).
166976	ACTINOPTERYGII	CYPRINIFORMES	CYPRINIDAE	Onychostoma	simum	Data Deficient	Freshwater (=Inland waters)	[{'habitat': 'Artificial/Aquatic - Seasonally Flooded Agricultural Land', 'code': '15.8', 'season': None, 'suitability': 'Unknown', 'majorimportance': None}, {'habitat': 'Wetlands (inland) - Permanent Rivers/Streams/Creeks (includes waterfalls)', 'code': '5.1', 'season': None, 'suitability': 'Suitable', 'majorimportance': 'Yes'}]	[{'code': '7.2', 'score': 'Unknown', 'severity': 'Unknown', 'timing': 'Ongoing', 'title': 'Dams & water management/use', 'invasive': None, 'scope': 'Majority (50-90%)'}, {'code': '7.2.11', 'score': 'Unknown', 'severity': 'Unknown', 'timing': 'Ongoing', 'title': 'Dams (size unknown)', 'invasive': None, 'scope': 'Majority (50-90%)'}, {'code': '9.1', 'score': 'Unknown', 'severity': 'Unknown', 'timin…	Many rivers in the species range are impacted by dams and pollution (agricultural, urban and industrial).
166978	ACTINOPTERYGII	SYNBRANCHIFORMES	MASTACEMBELIDAE	Sinobdella	sinensis	Least Concern	Freshwater (=Inland waters)	[{'habitat': 'Wetlands (inland) - Permanent Rivers/Streams/Creeks (includes waterfalls)', 'code': '5.1', 'season': None, 'suitability': 'Suitable', 'majorimportance': 'Yes'}]	[{'code': '11.1', 'score': 'No/Negligible Impact: 0', 'severity': None, 'timing': None, 'title': 'Habitat shifting & alteration', 'invasive': None, 'scope': None}, {'code': '11.2', 'score': 'No/Negligible Impact: 0', 'severity': None, 'timing': None, 'title': 'Droughts', 'invasive': None, 'scope': None}, {'code': '11.3', 'score': 'No/Negligible Impact: 0', 'severity': None, 'timing': None, 'title…	No information available on the threats to the species.
166980	ACTINOPTERYGII	PERCIFORMES	GOBIIDAE	Rhinogobius	giurinus	Least Concern	Freshwater (=Inland waters)	[{'habitat': 'Marine Oceanic - Epipelagic (0-200m)', 'code': '10.1', 'season': None, 'suitability': 'Suitable', 'majorimportance': 'Yes'}, {'habitat': 'Wetlands (inland) - Permanent Rivers/Streams/Creeks (includes waterfalls)', 'code': '5.1', 'season': None, 'suitability': 'Suitable', 'majorimportance': 'Yes'}, {'habitat': 'Wetlands (inland) - Permanent Saline, Brackish or Alkaline Lakes', 'code'…	[]	No information available on the threats to the species.
166981	ACTINOPTERYGII	CYPRINIFORMES	CYPRINIDAE	Poropuntius	kontumensis	Data Deficient	Freshwater (=Inland waters)	[{'habitat': 'Wetlands (inland) - Permanent Rivers/Streams/Creeks (includes waterfalls)', 'code': '5.1', 'season': None, 'suitability': 'Suitable', 'majorimportance': 'Yes'}, {'habitat': 'Wetlands (inland) - Seasonal/Intermittent Freshwater Marshes/Pools (under 8ha)', 'code': '5.8', 'season': None, 'suitability': 'Suitable', 'majorimportance': 'Yes'}]	[{'code': '5.3', 'score': 'Unknown', 'severity': 'Unknown', 'timing': 'Ongoing', 'title': 'Logging & wood harvesting', 'invasive': None, 'scope': 'Majority (50-90%)'}, {'code': '5.3.5', 'score': 'Unknown', 'severity': 'Unknown', 'timing': 'Ongoing', 'title': 'Motivation Unknown/Unrecorded', 'invasive': None, 'scope': 'Majority (50-90%)'}, {'code': '9.3', 'score': 'Unknown', 'severity': 'Unknown',…	The species is likely to be impacted by habitat degradation.
166984	ACTINOPTERYGII	CYPRINIFORMES	COBITIDAE	Cobitis	longitaeniatus	Data Deficient	Freshwater (=Inland waters)	[{'habitat': 'Wetlands (inland) - Permanent Rivers/Streams/Creeks (includes waterfalls)', 'code': '5.1', 'season': None, 'suitability': 'Suitable', 'majorimportance': 'Yes'}]	[]	No information available.
166985	ACTINOPTERYGII	BELONIFORMES	HEMIRAMPHIDAE	Hyporhamphus	unifasciatus	Least Concern	Marine	[{'habitat': 'Marine Oceanic - Epipelagic (0-200m)', 'code': '10.1', 'season': 'resident', 'suitability': 'Suitable', 'majorimportance': 'Yes'}, {'habitat': 'Marine Neritic - Estuaries', 'code': '9.10', 'season': 'resident', 'suitability': 'Suitable', 'majorimportance': 'Yes'}]	[]	There are no known major threats.
166987	ACTINOPTERYGII	CYPRINIFORMES	COBITIDAE	Cobitis	phongnhaensis	Data Deficient	Freshwater (=Inland waters)	[{'habitat': 'Wetlands (inland) - Permanent Rivers/Streams/Creeks (includes waterfalls)', 'code': '5.1', 'season': None, 'suitability': 'Unknown', 'majorimportance': None}]	[{'code': '1.3', 'score': 'Unknown', 'severity': 'Unknown', 'timing': 'Ongoing', 'title': 'Tourism & recreation areas', 'invasive': None, 'scope': 'Whole (>90%)'}, {'code': '9.1', 'score': 'Unknown', 'severity': 'Unknown', 'timing': 'Ongoing', 'title': 'Domestic & urban waste water', 'invasive': None, 'scope': 'Whole (>90%)'}, {'code': '9.1.1', 'score': 'Unknown', 'severity': 'Unknown', 'timing':…	The species may be impacted by tourist and residential developments.
166988	ACTINOPTERYGII	CYPRINIFORMES	CYPRINIDAE	Neolissochilus	benasi	Data Deficient	Freshwater (=Inland waters)	[{'habitat': 'Wetlands (inland) - Permanent Rivers/Streams/Creeks (includes waterfalls)', 'code': '5.1', 'season': None, 'suitability': 'Suitable', 'majorimportance': 'Yes'}]	[]	No information available on the threats to the species.
166990	ACTINOPTERYGII	PERCIFORMES	GOBIIDAE	Boleophthalmus	boddarti	Least Concern	Freshwater (=Inland waters)|Marine	[{'habitat': 'Marine Oceanic - Epipelagic (0-200m)', 'code': '10.1', 'season': None, 'suitability': 'Suitable', 'majorimportance': 'Yes'}, {'habitat': 'Marine Intertidal - Mud Flats and Salt Flats', 'code': '12.4', 'season': None, 'suitability': 'Suitable', 'majorimportance': 'Yes'}, {'habitat': 'Marine Intertidal - Mangrove Submerged Roots', 'code': '12.7', 'season': None, 'suitability': 'Suitab…	[{'code': '9.1', 'score': 'Unknown', 'severity': 'Unknown', 'timing': 'Ongoing', 'title': 'Domestic & urban waste water', 'invasive': None, 'scope': 'Unknown'}, {'code': '9.1.1', 'score': 'Unknown', 'severity': 'Unknown', 'timing': 'Ongoing', 'title': 'Sewage', 'invasive': None, 'scope': 'Unknown'}, {'code': '9.4', 'score': 'Unknown', 'severity': 'Unknown', 'timing': 'Ongoing', 'title': 'Garbage …	Likely to be impacted in parts of its range by pollution, especially in estuaries, but this needs to be verified by further research.
166991	ACTINOPTERYGII	SILURIFORMES	SILURIDAE	Pterocryptis	cochinchinensis	Least Concern	Freshwater (=Inland waters)	[{'habitat': 'Wetlands (inland) - Permanent Rivers/Streams/Creeks (includes waterfalls)', 'code': '5.1', 'season': None, 'suitability': 'Suitable', 'majorimportance': 'Yes'}]	[]	No information available on the threats to the species.
166992	ACTINOPTERYGII	PERCIFORMES	GOBIIDAE	Caragobius	urolepis	Least Concern	Freshwater (=Inland waters)|Marine	[{'habitat': 'Marine Intertidal - Mud Flats and Salt Flats', 'code': '12.4', 'season': None, 'suitability': 'Suitable', 'majorimportance': 'Yes'}, {'habitat': 'Marine Intertidal - Mangrove Submerged Roots', 'code': '12.7', 'season': None, 'suitability': 'Suitable', 'majorimportance': 'Yes'}, {'habitat': 'Wetlands (inland) - Seasonal/Intermittent Saline, Brackish or Alkaline Lakes and Flats', 'cod…	[]	This species may be threatened by removal or destruction of habitat - e.g. mangroves.
166997	ACTINOPTERYGII	TETRAODONTIFORMES	TETRAODONTIDAE	Tetraodon	biocellatus	Least Concern	Freshwater (=Inland waters)	[{'habitat': 'Wetlands (inland) - Permanent Rivers/Streams/Creeks (includes waterfalls)', 'code': '5.1', 'season': None, 'suitability': 'Suitable', 'majorimportance': 'Yes'}, {'habitat': 'Wetlands (inland) - Permanent Saline, Brackish or Alkaline Lakes', 'code': '5.14', 'season': None, 'suitability': 'Suitable', 'majorimportance': 'Yes'}, {'habitat': 'Wetlands (inland) - Seasonal/Intermittent/Irr…	[]	No threats are currently recorded for the species.
166998	ACTINOPTERYGII	CYPRINIFORMES	BALITORIDAE	Balitora	lancangjiangensis	Least Concern	Freshwater (=Inland waters)	[{'habitat': 'Wetlands (inland) - Permanent Rivers/Streams/Creeks (includes waterfalls)', 'code': '5.1', 'season': None, 'suitability': 'Suitable', 'majorimportance': 'Yes'}]	[{'code': '7.2', 'score': 'Unknown', 'severity': 'Unknown', 'timing': 'Ongoing', 'title': 'Dams & water management/use', 'invasive': None, 'scope': 'Minority (<50%)'}, {'code': '7.2.11', 'score': 'Unknown', 'severity': 'Unknown', 'timing': 'Ongoing', 'title': 'Dams (size unknown)', 'invasive': None, 'scope': 'Minority (<50%)'}, {'code': '9.3', 'score': 'Unknown', 'severity': 'Unknown', 'timing': …	<p>Anthropogenic modification of river morphology impacts this species by reducing or interrupting fast water flow. Logging, deforestation and agriculture occurs in the area, with associated impacts on the aquatic environment expected (M. Kottelat pers. comm. 2011).</p>
167001	ACTINOPTERYGII	SILURIFORMES	BAGRIDAE	Tachysurus	virgatus	Data Deficient	Freshwater (=Inland waters)	[{'habitat': 'Wetlands (inland) - Permanent Rivers/Streams/Creeks (includes waterfalls)', 'code': '5.1', 'season': None, 'suitability': 'Suitable', 'majorimportance': 'Yes'}]	[]	The threats to this species are unknown, since there is no information on the biology of this species and therefore the impact of potential threats (especially those of an anthropogenic nature) remains unknown. The current threats to aquatic biodiversity in all of its known distribution have also not been adequately identified.
167003	ACTINOPTERYGII	SILURIFORMES	BAGRIDAE	Hemibagrus	centralus	Data Deficient	Freshwater (=Inland waters)	[{'habitat': 'Wetlands (inland) - Permanent Rivers/Streams/Creeks (includes waterfalls)', 'code': '5.1', 'season': None, 'suitability': 'Suitable', 'majorimportance': 'Yes'}]	[]	The threats to this species are unknown, since there is no information on the biology of this species and therefore the impact of potential threats (especially those of an anthropogenic nature) remains unknown. The current threats to aquatic biodiversity in all of its known distribution have also not been adequately identified.
167004	ACTINOPTERYGII	CYPRINIFORMES	CYPRINIDAE	Garra	laichowensis	Data Deficient	Freshwater (=Inland waters)	[{'habitat': 'Wetlands (inland) - Permanent Rivers/Streams/Creeks (includes waterfalls)', 'code': '5.1', 'season': None, 'suitability': 'Suitable', 'majorimportance': 'Yes'}]	[{'code': '7.2', 'score': 'Unknown', 'severity': 'Unknown', 'timing': 'Ongoing', 'title': 'Dams & water management/use', 'invasive': None, 'scope': 'Majority (50-90%)'}, {'code': '7.2.10', 'score': 'Unknown', 'severity': 'Unknown', 'timing': 'Ongoing', 'title': 'Large dams', 'invasive': None, 'scope': 'Majority (50-90%)'}, {'code': '9.1', 'score': 'Unknown', 'severity': 'Unknown', 'timing': 'Ongo…	<p>This species is impacted by pollution from urban sources and the river is impacted by the Hoa Binh dam. </p>
167005	ACTINOPTERYGII	CYPRINIFORMES	CYPRINIDAE	Abbottina	binhi	Data Deficient	Freshwater (=Inland waters)	[{'habitat': 'Wetlands (inland) - Seasonal/Intermittent Freshwater Marshes/Pools (under 8ha)', 'code': '5.8', 'season': None, 'suitability': 'Suitable', 'majorimportance': 'Yes'}]	[]	No information available.
167006	ACTINOPTERYGII	TETRAODONTIFORMES	TETRAODONTIDAE	Takifugu	ocellatus	Near Threatened	Freshwater (=Inland waters)|Marine	[{'habitat': 'Marine Oceanic - Epipelagic (0-200m)', 'code': '10.1', 'season': None, 'suitability': None, 'majorimportance': None}, {'habitat': 'Wetlands (inland) - Permanent Saline, Brackish or Alkaline Lakes', 'code': '5.14', 'season': None, 'suitability': None, 'majorimportance': None}, {'habitat': 'Marine Neritic - Estuaries', 'code': '9.10', 'season': None, 'suitability': None, 'majorimporta…	[{'code': '1.1', 'score': 'Unknown', 'severity': 'Unknown', 'timing': 'Ongoing', 'title': 'Housing & urban areas', 'invasive': None, 'scope': 'Unknown'}, {'code': '11.1', 'score': 'Unknown', 'severity': 'Unknown', 'timing': 'Ongoing', 'title': 'Habitat shifting & alteration', 'invasive': None, 'scope': 'Unknown'}, {'code': '11.3', 'score': 'Unknown', 'severity': 'Unknown', 'timing': 'Ongoing', 't…	There have been anecdotal population declines in <span style="font-style: italic;">T. ocellatus</span> which have been attributed to overfishing and pollution.&#160;However, it is likely to be impacted by the following:<br/><br/><span style="font-weight: bold;">Fugu fishery</span><br/> The Fugu fishery is acknowledged to have undergone significant declines throughout East Asia. Highly-effective f…
167007	ACTINOPTERYGII	CYPRINIFORMES	CYPRINIDAE	Scaphiodonichthys	acanthopterus	Least Concern	Freshwater (=Inland waters)	[{'habitat': 'Wetlands (inland) - Permanent Rivers/Streams/Creeks (includes waterfalls)', 'code': '5.1', 'season': None, 'suitability': 'Suitable', 'majorimportance': 'Yes'}]	[{'code': '9.3', 'score': 'Low Impact: 5', 'severity': 'Negligible declines', 'timing': 'Ongoing', 'title': 'Agricultural & forestry effluents', 'invasive': None, 'scope': 'Majority (50-90%)'}, {'code': '9.3.4', 'score': 'Low Impact: 5', 'severity': 'Negligible declines', 'timing': 'Ongoing', 'title': 'Type Unknown/Unrecorded', 'invasive': None, 'scope': 'Majority (50-90%)'}]	Deforestation, overfishing and illegal fishing are potential threats to this fish, but no significant population decline has been shown recently.
167008	ACTINOPTERYGII	CYPRINIFORMES	CYPRINIDAE	Ochetobius	elongatus	Least Concern	Freshwater (=Inland waters)	[{'habitat': 'Artificial/Aquatic - Water Storage Areas (over 8ha)', 'code': '15.1', 'season': None, 'suitability': 'Suitable', 'majorimportance': 'No'}, {'habitat': 'Wetlands (inland) - Permanent Rivers/Streams/Creeks (includes waterfalls)', 'code': '5.1', 'season': None, 'suitability': 'Suitable', 'majorimportance': 'Yes'}, {'habitat': 'Wetlands (inland) - Permanent Freshwater Lakes (over 8ha)',…	[]	No information is available on the threats to the species, however they are likely to include overfishing and habitat degradation.
167010	ACTINOPTERYGII	PERCIFORMES	GOBIIDAE	Oxyurichthys	tentacularis	Data Deficient	Marine	[{'habitat': 'Marine Coastal/Supratidal - Coastal Brackish/Saline Lagoons/Marine Lakes', 'code': '13.4', 'season': None, 'suitability': 'Suitable', 'majorimportance': None}, {'habitat': 'Marine Neritic - Estuaries', 'code': '9.10', 'season': None, 'suitability': 'Suitable', 'majorimportance': None}]	[]	No major threats are known to this species.
167011	ACTINOPTERYGII	CYPRINIFORMES	BALITORIDAE	Sinogastromyzon	chapaensis	Data Deficient	Freshwater (=Inland waters)	[{'habitat': 'Wetlands (inland) - Permanent Rivers/Streams/Creeks (includes waterfalls)', 'code': '5.1', 'season': None, 'suitability': 'Suitable', 'majorimportance': 'Yes'}]	[]	No information available on the threats to the species.
167012	ACTINOPTERYGII	CYPRINIFORMES	CYPRINIDAE	Squalidus	atromaculatus	Least Concern	Freshwater (=Inland waters)	[{'habitat': 'Wetlands (inland) - Permanent Rivers/Streams/Creeks (includes waterfalls)', 'code': '5.1', 'season': None, 'suitability': 'Suitable', 'majorimportance': 'Yes'}]	[]	No information available on the threats to the species.
168251	ACTINOPTERYGII	CYPRINIFORMES	CYPRINIDAE	Garra	imberbis	Data Deficient	Freshwater (=Inland waters)	[{'habitat': 'Wetlands (inland) - Permanent Rivers/Streams/Creeks (includes waterfalls)', 'code': '5.1', 'season': None, 'suitability': 'Suitable', 'majorimportance': 'Yes'}]	[{'code': '7.2', 'score': 'Unknown', 'severity': 'Unknown', 'timing': 'Ongoing', 'title': 'Dams & water management/use', 'invasive': None, 'scope': 'Majority (50-90%)'}, {'code': '7.2.11', 'score': 'Unknown', 'severity': 'Unknown', 'timing': 'Ongoing', 'title': 'Dams (size unknown)', 'invasive': None, 'scope': 'Majority (50-90%)'}, {'code': '9.3', 'score': 'Unknown', 'severity': 'Unknown', 'timin…	No information available on the threats to the species. However, erosion and siltation result in sediments covering the stone will eliminate its food source. Alteration of river morphology (especially dams) will modify the current or inundate the rapids and eliminate its habitat.
168341	ACTINOPTERYGII	PERCIFORMES	BADIDAE	Badis	ruber	Least Concern	Freshwater (=Inland waters)	[{'habitat': 'Wetlands (inland) - Permanent Rivers/Streams/Creeks (includes waterfalls)', 'code': '5.1', 'season': None, 'suitability': 'Suitable', 'majorimportance': 'Yes'}, {'habitat': 'Wetlands (inland) - Seasonal/Intermittent/Irregular Rivers/Streams/Creeks', 'code': '5.2', 'season': None, 'suitability': 'Suitable', 'majorimportance': 'No'}, {'habitat': 'Wetlands (inland) - Seasonal/Intermitt…	[{'code': '5.4', 'score': 'Unknown', 'severity': 'Unknown', 'timing': 'Ongoing', 'title': 'Fishing & harvesting aquatic resources', 'invasive': None, 'scope': 'Majority (50-90%)'}, {'code': '5.4', 'score': '(Not specified)', 'severity': None, 'timing': None, 'title': 'Fishing & harvesting aquatic resources', 'invasive': None, 'scope': None}, {'code': '5.4.1', 'score': 'Unknown', 'severity': 'Unkn…	Illegal fishing, habitat destruction and commercial exploitation for ornamental value are causes for concern, but the threats to the species are not known.
168409	ACTINOPTERYGII	CYPRINIFORMES	CYPRINIDAE	Danio	margaritatus	Data Deficient	Freshwater (=Inland waters)	[{'habitat': 'Wetlands (inland) - Permanent Freshwater Marshes/Pools (under 8ha)', 'code': '5.7', 'season': None, 'suitability': 'Suitable', 'majorimportance': 'Yes'}]	[{'code': '5.4', 'score': 'High Impact: 8', 'severity': 'Rapid Declines', 'timing': 'Ongoing', 'title': 'Fishing & harvesting aquatic resources', 'invasive': None, 'scope': 'Whole (>90%)'}, {'code': '5.4.1', 'score': 'High Impact: 8', 'severity': 'Rapid Declines', 'timing': 'Ongoing', 'title': 'Intentional use: (subsistence/small scale) [harvest]', 'invasive': None, 'scope': 'Whole (>90%)'}]	The population at the type locality suffered from over-exploitation, but further populations elsewhere in Myanmar and in northeastern Thailand have been recorded.
168425	ACTINOPTERYGII	CYPRINIFORMES	BALITORIDAE	Homaloptera	rupicola	Least Concern	Freshwater (=Inland waters)	[{'habitat': 'Wetlands (inland) - Permanent Rivers/Streams/Creeks (includes waterfalls)', 'code': '5.1', 'season': None, 'suitability': 'Suitable', 'majorimportance': 'Yes'}]	[]	There are no known threats to this species, and research is required.
168449	ACTINOPTERYGII	CYPRINIFORMES	CYPRINIDAE	Gymnostomus	horai	Endangered	Freshwater (=Inland waters)	[{'habitat': 'Wetlands (inland) - Permanent Freshwater Lakes (over 8ha)', 'code': '5.5', 'season': None, 'suitability': 'Suitable', 'majorimportance': 'Yes'}]	[{'code': '5.3', 'score': 'Low Impact: 5', 'severity': 'Slow, Significant Declines', 'timing': 'Ongoing', 'title': 'Logging & wood harvesting', 'invasive': None, 'scope': 'Minority (<50%)'}, {'code': '5.3.2', 'score': 'Low Impact: 5', 'severity': 'Slow, Significant Declines', 'timing': 'Ongoing', 'title': 'Intentional use: (large scale) [harvest]', 'invasive': None, 'scope': 'Minority (<50%)'}, {…	Threats&#160;to the aquatic habitat of InlÃ© Lake include&#160;introduced&#160;fish species, over-fishing, and pollution from a growing&#160;urban population and increasing agricultural&#160;activities. The open water area of the lake has shrunk by more than 30% over the last 65 years (1935-2000) due to human activities such as shifting agriculture, timber removal and unsustainable cultivation pr…
168540	ACTINOPTERYGII	SYNBRANCHIFORMES	CHAUDHURIIDAE	Chaudhuria	caudata	Data Deficient	Freshwater (=Inland waters)	[{'habitat': 'Wetlands (inland) - Permanent Rivers/Streams/Creeks (includes waterfalls)', 'code': '5.1', 'season': None, 'suitability': 'Suitable', 'majorimportance': 'Yes'}, {'habitat': 'Wetlands (inland) - Seasonal/Intermittent/Irregular Rivers/Streams/Creeks', 'code': '5.2', 'season': None, 'suitability': 'Suitable', 'majorimportance': 'Yes'}, {'habitat': 'Wetlands (inland) - Seasonal/Intermit…	[{'code': '1.1', 'score': 'Unknown', 'severity': 'Unknown', 'timing': 'Ongoing', 'title': 'Housing & urban areas', 'invasive': None, 'scope': 'Minority (<50%)'}, {'code': '7.2', 'score': 'Unknown', 'severity': 'Unknown', 'timing': 'Ongoing', 'title': 'Dams & water management/use', 'invasive': None, 'scope': 'Minority (<50%)'}, {'code': '7.2.4', 'score': 'Unknown', 'severity': 'Unknown', 'timing':…	Conversion of wetlands for agriculture and urbanisation, and drying of wetlands through water abstraction will impact the species habitats.
168543	ACTINOPTERYGII	CYPRINIFORMES	CYPRINIDAE	Neolissochilus	nigrovittatus	Data Deficient	Freshwater (=Inland waters)	[{'habitat': 'Wetlands (inland) - Permanent Rivers/Streams/Creeks (includes waterfalls)', 'code': '5.1', 'season': None, 'suitability': 'Suitable', 'majorimportance': 'Yes'}]	[{'code': '5.4', 'score': 'Low Impact: 5', 'severity': 'Slow, Significant Declines', 'timing': 'Ongoing', 'title': 'Fishing & harvesting aquatic resources', 'invasive': None, 'scope': 'Minority (<50%)'}, {'code': '5.4.1', 'score': 'Low Impact: 5', 'severity': 'Slow, Significant Declines', 'timing': 'Ongoing', 'title': 'Intentional use: (subsistence/small scale) [harvest]', 'invasive': None, 'scop…	<p><span lang="EN-IN">Pollution from a range of sources impacts the lake; sedimentation and agricultural pollution from the surrounding drainage, as well as direct pollution inputs form the growing human settlements around the lake.</p>
168601	ACTINOPTERYGII	CYPRINIFORMES	BALITORIDAE	Neonoemacheilus	peguensis	Data Deficient	Freshwater (=Inland waters)	[{'habitat': 'Wetlands (inland) - Permanent Rivers/Streams/Creeks (includes waterfalls)', 'code': '5.1', 'season': None, 'suitability': 'Suitable', 'majorimportance': 'Yes'}]	[{'code': '5.3', 'score': 'Unknown', 'severity': 'Unknown', 'timing': 'Ongoing', 'title': 'Logging & wood harvesting', 'invasive': None, 'scope': 'Unknown'}, {'code': '5.3.3', 'score': 'Unknown', 'severity': 'Unknown', 'timing': 'Ongoing', 'title': 'Unintentional effects: (subsistence/small scale) [harvest]', 'invasive': None, 'scope': 'Unknown'}, {'code': '9.3', 'score': 'Unknown', 'severity': '…	The species is prone to threats such as deforestation and siltation leading to habitat loss.
169362	ACTINOPTERYGII	MUGILIFORMES	MUGILIDAE	Cestraeus	oxyrhyncus	Data Deficient	Freshwater (=Inland waters)	[{'habitat': 'Wetlands (inland) - Permanent Rivers/Streams/Creeks (includes waterfalls)', 'code': '5.1', 'season': None, 'suitability': 'Suitable', 'majorimportance': 'Yes'}]	[]	Any anthropogenic threats, including degradation of habitats and pollution, especially from rising human populations, may affect this species.
169374	ACTINOPTERYGII	CYPRINODONTIFORMES	FUNDULIDAE	Fundulus	persimilis	Endangered	Freshwater (=Inland waters)|Marine	[{'habitat': 'Marine Coastal/Supratidal - Coastal Brackish/Saline Lagoons/Marine Lakes', 'code': '13.4', 'season': None, 'suitability': 'Suitable', 'majorimportance': None}, {'habitat': 'Wetlands (inland) - Permanent Rivers/Streams/Creeks (includes waterfalls)', 'code': '5.1', 'season': 'resident', 'suitability': 'Suitable', 'majorimportance': 'Yes'}, {'habitat': 'Marine Neritic - Estuaries', 'co…	[{'code': '5.4', 'score': 'Unknown', 'severity': 'Unknown', 'timing': 'Ongoing', 'title': 'Fishing & harvesting aquatic resources', 'invasive': None, 'scope': 'Unknown'}, {'code': '5.4.1', 'score': 'Unknown', 'severity': 'Unknown', 'timing': 'Ongoing', 'title': 'Intentional use: (subsistence/small scale) [harvest]', 'invasive': None, 'scope': 'Unknown'}, {'code': '9.1', 'score': 'Unknown', 'sever…	This species may be threatened by habitat degradation due to pollution within its restricted range. It may also be used as bait in some locations (M. Vega-Cendejas pers. comm. 2014).
169495	ACTINOPTERYGII	CYPRINIFORMES	CYPRINIDAE	Crossocheilus	reticulatus	Least Concern	Freshwater (=Inland waters)	[{'habitat': 'Wetlands (inland) - Permanent Rivers/Streams/Creeks (includes waterfalls)', 'code': '5.1', 'season': None, 'suitability': 'Suitable', 'majorimportance': 'Yes'}, {'habitat': 'Wetlands (inland) - Seasonal/Intermittent Freshwater Marshes/Pools (under 8ha)', 'code': '5.8', 'season': None, 'suitability': 'Suitable', 'majorimportance': None}]	[{'code': '5.4', 'score': 'Low Impact: 3', 'severity': None, 'timing': 'Ongoing', 'title': 'Fishing & harvesting aquatic resources', 'invasive': None, 'scope': None}, {'code': '5.4.6', 'score': 'Low Impact: 3', 'severity': None, 'timing': 'Ongoing', 'title': 'Motivation Unknown/Unrecorded', 'invasive': None, 'scope': None}, {'code': '7.2', 'score': 'Low Impact: 3', 'severity': None, 'timing': 'On…	There are a number of large dams and other water diversion projects within the range of this species, which are a threat in both the Chao Phraya; effects of developments such as these to the freshwater ecosystem include alterations to the hydrological cycle, and changes to the levels of sedimentation and dissolved oxygen. Water from both the Chao Phraya and Mekong Rivers is used for agricultural …
169501	ACTINOPTERYGII	CYPRINIFORMES	BALITORIDAE	Schistura	pervagata	Least Concern	Freshwater (=Inland waters)	[{'habitat': 'Wetlands (inland) - Permanent Rivers/Streams/Creeks (includes waterfalls)', 'code': '5.1', 'season': None, 'suitability': 'Suitable', 'majorimportance': 'Yes'}]	[{'code': '5.3', 'score': 'Unknown', 'severity': 'Unknown', 'timing': 'Ongoing', 'title': 'Logging & wood harvesting', 'invasive': None, 'scope': 'Majority (50-90%)'}, {'code': '5.3.5', 'score': 'Unknown', 'severity': 'Unknown', 'timing': 'Ongoing', 'title': 'Motivation Unknown/Unrecorded', 'invasive': None, 'scope': 'Majority (50-90%)'}, {'code': '9.2', 'score': 'Unknown', 'severity': 'Unknown',…	No specific threat known, but logging, deforestation and agriculture occurs in the area, with associated impacts on the aquatic environment expected (M. Kottelat pers. comm. 2011). The lower part of the Ma River is impacted by agriculture, urban development and pollution.
169504	ACTINOPTERYGII	CYPRINIFORMES	CYPRINIDAE	Amblypharyngodon	chulabhornae	Least Concern	Freshwater (=Inland waters)	[{'habitat': 'Artificial/Aquatic - Seasonally Flooded Agricultural Land', 'code': '15.8', 'season': None, 'suitability': 'Suitable', 'majorimportance': 'No'}, {'habitat': 'Wetlands (inland) - Seasonal/Intermittent Freshwater Lakes (over 8ha)', 'code': '5.6', 'season': None, 'suitability': 'Suitable', 'majorimportance': 'Yes'}, {'habitat': 'Wetlands (inland) - Seasonal/Intermittent Freshwater Mars…	[{'code': '7.2', 'score': 'Unknown', 'severity': 'Unknown', 'timing': 'Ongoing', 'title': 'Dams & water management/use', 'invasive': None, 'scope': 'Unknown'}, {'code': '7.2.11', 'score': 'Unknown', 'severity': 'Unknown', 'timing': 'Ongoing', 'title': 'Dams (size unknown)', 'invasive': None, 'scope': 'Unknown'}, {'code': '9.1', 'score': 'Unknown', 'severity': 'Unknown', 'timing': 'Ongoing', 'titl…	The water of the Chao Phraya basin, particularly the rivers of the lower basin, is heavily polluted; UNESCO (2006) states that 'the Chao Phraya River exhibited serious organic and bacterial pollution that was a threat to many species of aquatic life.' There are also reports of high levels of pollution in the Mekong River basin. No detailed information is known about potential threats to the speci…
169505	ACTINOPTERYGII	TETRAODONTIFORMES	TETRAODONTIDAE	Monotrete	cambodgiensis	Least Concern	Freshwater (=Inland waters)	[{'habitat': 'Wetlands (inland) - Permanent Rivers/Streams/Creeks (includes waterfalls)', 'code': '5.1', 'season': None, 'suitability': 'Suitable', 'majorimportance': 'Yes'}]	[{'code': '7.2', 'score': 'Unknown', 'severity': 'Unknown', 'timing': 'Future', 'title': 'Dams & water management/use', 'invasive': None, 'scope': 'Unknown'}, {'code': '7.2.11', 'score': 'Unknown', 'severity': 'Unknown', 'timing': 'Future', 'title': 'Dams (size unknown)', 'invasive': None, 'scope': 'Unknown'}, {'code': '9.2', 'score': 'Unknown', 'severity': 'Unknown', 'timing': 'Ongoing', 'title'…	No major threats to this species have been reported. A major future threat to species in the Mekong river is habitat degradation from the construction of dams and other water management projects, more of which are planned for the future; the effects of such projects include disruption to the natural flood/drought cycle of the river, and changed levels of sedimentation and dissolved oxygen (Intern…
169512	ACTINOPTERYGII	CYPRINIFORMES	BALITORIDAE	Schistura	personata	Near Threatened	Freshwater (=Inland waters)	[{'habitat': 'Wetlands (inland) - Permanent Rivers/Streams/Creeks (includes waterfalls)', 'code': '5.1', 'season': None, 'suitability': 'Suitable', 'majorimportance': 'Yes'}]	[{'code': '3.2', 'score': 'Medium Impact: 6', 'severity': 'Slow, Significant Declines', 'timing': 'Ongoing', 'title': 'Mining & quarrying', 'invasive': None, 'scope': 'Majority (50-90%)'}, {'code': '7.2', 'score': 'Unknown', 'severity': 'Unknown', 'timing': 'Ongoing', 'title': 'Dams & water management/use', 'invasive': None, 'scope': 'Majority (50-90%)'}, {'code': '7.2.11', 'score': 'Unknown', 's…	The Nam Ngum 1 dam&#160; was completed in 1971 and the species is only known from above above the reservoir of this dam. Whilst further dams and flow control developments are proposed within the Nam Ngum basin (the "Nam Ngum hydropower cascade"), it is not thought that these will directly impact the Nam San. The Nam Ngum 2, north of the Nam Ngum 1 dam, is now operational (2012), and there are at …
169514	ACTINOPTERYGII	SYNBRANCHIFORMES	MASTACEMBELIDAE	Mastacembelus	oatesii	Endangered	Freshwater (=Inland waters)	[{'habitat': 'Wetlands (inland) - Permanent Rivers/Streams/Creeks (includes waterfalls)', 'code': '5.1', 'season': None, 'suitability': 'Suitable', 'majorimportance': 'Yes'}, {'habitat': 'Wetlands (inland) - Permanent Freshwater Lakes (over 8ha)', 'code': '5.5', 'season': None, 'suitability': 'Suitable', 'majorimportance': 'Yes'}]	[{'code': '1.3', 'score': 'Unknown', 'severity': 'Unknown', 'timing': 'Ongoing', 'title': 'Tourism & recreation areas', 'invasive': None, 'scope': 'Majority (50-90%)'}, {'code': '6.1', 'score': 'Unknown', 'severity': 'Unknown', 'timing': 'Ongoing', 'title': 'Recreational activities', 'invasive': None, 'scope': 'Majority (50-90%)'}, {'code': '9.1', 'score': 'Unknown', 'severity': 'Unknown', 'timin…	Pollution from a range of sources impacts the lake; sedimentation and agricultural pollution from the surrounding drainage, as well as direct pollution inputs from the growing human settlements around the lake.<br/><br/>Akaishi <span style="font-style: italic;">et al.</span> (2006) analysed water quality in the lake and found it to be eutrophic. Sidle<span style="font-style: italic;"> et al. </sp…
169519	ACTINOPTERYGII	CYPRINIFORMES	CYPRINIDAE	Boraras	maculatus	Least Concern	Freshwater (=Inland waters)	[{'habitat': 'Wetlands (inland) - Permanent Rivers/Streams/Creeks (includes waterfalls)', 'code': '5.1', 'season': None, 'suitability': 'Suitable', 'majorimportance': 'Yes'}, {'habitat': 'Wetlands (inland) - Bogs, Marshes, Swamps, Fens, Peatlands', 'code': '5.4', 'season': None, 'suitability': 'Suitable', 'majorimportance': 'Yes'}]	[]	Threats to this species and its habitat are unknown at present. It is impacted by forest loss (e.g. in Singapore) and likely by sedimentation, but further research is required.
169520	ACTINOPTERYGII	CYPRINIFORMES	BALITORIDAE	Schistura	dubia	Data Deficient	Freshwater (=Inland waters)	[{'habitat': 'Wetlands (inland) - Permanent Rivers/Streams/Creeks (includes waterfalls)', 'code': '5.1', 'season': None, 'suitability': 'Suitable', 'majorimportance': 'Yes'}]	[{'code': '7.3', 'score': 'Unknown', 'severity': 'Unknown', 'timing': 'Ongoing', 'title': 'Other ecosystem modifications', 'invasive': None, 'scope': 'Majority (50-90%)'}, {'code': '9.3', 'score': 'Unknown', 'severity': 'Unknown', 'timing': 'Ongoing', 'title': 'Agricultural & forestry effluents', 'invasive': None, 'scope': 'Majority (50-90%)'}, {'code': '9.3.4', 'score': 'Unknown', 'severity': 'U…	<p><span lang="EN-GB">Anthropogenic alteration of stream morphology impacts this species by reducing or interrupting water flow. Deforestation and agriculture occur in the area, with associated impacts on the aquatic environment.</p>
169529	ACTINOPTERYGII	TETRAODONTIFORMES	TETRAODONTIDAE	Monotrete	baileyi	Least Concern	Freshwater (=Inland waters)	[{'habitat': 'Wetlands (inland) - Permanent Rivers/Streams/Creeks (includes waterfalls)', 'code': '5.1', 'season': None, 'suitability': 'Suitable', 'majorimportance': 'Yes'}]	[{'code': '7.2', 'score': 'Unknown', 'severity': 'Unknown', 'timing': 'Future', 'title': 'Dams & water management/use', 'invasive': None, 'scope': 'Majority (50-90%)'}, {'code': '7.2.11', 'score': 'Unknown', 'severity': 'Unknown', 'timing': 'Future', 'title': 'Dams (size unknown)', 'invasive': None, 'scope': 'Majority (50-90%)'}, {'code': '9.1', 'score': 'Unknown', 'severity': 'Unknown', 'timing'…	Planned dams in the mainstream of the Mekong, as well as existing and proposed dams on many of its tributaries within the species range, are potential threats to this species. This will cause habitat degradation, disruption of the natural flood/drought cycle of the river, and changed levels of sedimentation and dissolved oxygen. Pollution from a range of sources may also impact the species in par…
169531	ACTINOPTERYGII	CYPRINIFORMES	BALITORIDAE	Schistura	balteata	Data Deficient	Freshwater (=Inland waters)	[{'habitat': 'Wetlands (inland) - Permanent Rivers/Streams/Creeks (includes waterfalls)', 'code': '5.1', 'season': None, 'suitability': 'Suitable', 'majorimportance': 'Yes'}]	[]	Threats to this species and its habitat are unknown at present. The species habitat would be impacted by pollution and changes to flow regimes arising from dam development.
169536	ACTINOPTERYGII	CYPRINIFORMES	BALITORIDAE	Schistura	spiesi	Vulnerable	Freshwater (=Inland waters)	[{'habitat': 'Wetlands (inland) - Karst and Other Subterranean Hydrological Systems (inland)', 'code': '5.18', 'season': None, 'suitability': 'Suitable', 'majorimportance': 'Yes'}]	[{'code': '5.3', 'score': 'Unknown', 'severity': 'Unknown', 'timing': 'Ongoing', 'title': 'Logging & wood harvesting', 'invasive': None, 'scope': 'Whole (>90%)'}, {'code': '5.3.3', 'score': 'Unknown', 'severity': 'Unknown', 'timing': 'Ongoing', 'title': 'Unintentional effects: (subsistence/small scale) [harvest]', 'invasive': None, 'scope': 'Whole (>90%)'}, {'code': '5.4', 'score': 'Unknown', 'se…	A potential risk to this species is collection for the aquarium trade, due to interest in the unusual habitat needs of this recently described blind, cave-dwelling loach. The species is also vulnerable to water pollution from domestic pollution and agricultural activities, and disturbance by visitors.
169539	ACTINOPTERYGII	CYPRINIFORMES	BALITORIDAE	Schistura	cataracta	Least Concern	Freshwater (=Inland waters)	[{'habitat': 'Wetlands (inland) - Permanent Rivers/Streams/Creeks (includes waterfalls)', 'code': '5.1', 'season': None, 'suitability': 'Suitable', 'majorimportance': 'Yes'}]	[{'code': '3.2', 'score': 'Unknown', 'severity': 'Unknown', 'timing': 'Ongoing', 'title': 'Mining & quarrying', 'invasive': None, 'scope': 'Majority (50-90%)'}, {'code': '7.2', 'score': 'Medium Impact: 6', 'severity': 'Causing/Could cause fluctuations', 'timing': 'Ongoing', 'title': 'Dams & water management/use', 'invasive': None, 'scope': 'Majority (50-90%)'}, {'code': '7.2', 'score': 'Low Impac…	Several dams exist on the Nam Theun and Nam Gnouang rivers: the Theun-Hinboun (commissioned in 1998), Theun-Hinboun Expansion (in construction) and the Nam Theun 2 (commissioned in May 2010). The impacts of the completed and proposed dams are not fully understood, however all have inundated long stretches of the river and have impacted the flow regime downstream. This species is not able to survi…
169546	ACTINOPTERYGII	CYPRINIFORMES	CYPRINIDAE	Esomus	longimanus	Data Deficient	Freshwater (=Inland waters)	[{'habitat': 'Artificial/Aquatic - Ponds (below 8ha)', 'code': '15.2', 'season': None, 'suitability': 'Unknown', 'majorimportance': None}, {'habitat': 'Artificial/Aquatic - Canals and Drainage Channels, Ditches', 'code': '15.9', 'season': None, 'suitability': 'Unknown', 'majorimportance': None}, {'habitat': 'Wetlands (inland) - Permanent Rivers/Streams/Creeks (includes waterfalls)', 'code': '5.1'…	[{'code': '7.2', 'score': 'Unknown', 'severity': 'Unknown', 'timing': 'Ongoing', 'title': 'Dams & water management/use', 'invasive': None, 'scope': 'Minority (<50%)'}, {'code': '7.2.11', 'score': 'Unknown', 'severity': 'Unknown', 'timing': 'Ongoing', 'title': 'Dams (size unknown)', 'invasive': None, 'scope': 'Minority (<50%)'}, {'code': '9.1', 'score': 'Unknown', 'severity': 'Unknown', 'timing': …	There are a number of large dams and other water diversion projects within the range of this species, which are a threat to the species; the effects of developments such as these to the freshwater ecosystem include alterations to the hydrological cycle, and changes to the levels of sedimentation and dissolved oxygen. More dams are currently under construction and are planned for the future. Water…
169564	ACTINOPTERYGII	CYPRINIFORMES	BALITORIDAE	Homaloptera	zollingeri	Least Concern	Freshwater (=Inland waters)	[{'habitat': 'Wetlands (inland) - Permanent Rivers/Streams/Creeks (includes waterfalls)', 'code': '5.1', 'season': None, 'suitability': 'Suitable', 'majorimportance': 'Yes'}]	[]	No specific threat known but logging, deforestation, mining and agriculture occurs in the EOO of the species, with associated impacts on the aquatic environment expected (M. Kottelat pers. comm. 2011).
169598	ACTINOPTERYGII	CYPRINIFORMES	BALITORIDAE	Neonoemacheilus	labeosus	Least Concern	Freshwater (=Inland waters)	[{'habitat': 'Wetlands (inland) - Permanent Rivers/Streams/Creeks (includes waterfalls)', 'code': '5.1', 'season': None, 'suitability': 'Suitable', 'majorimportance': 'Yes'}]	[{'code': '5.4', 'score': 'Unknown', 'severity': 'Unknown', 'timing': 'Ongoing', 'title': 'Fishing & harvesting aquatic resources', 'invasive': None, 'scope': 'Majority (50-90%)'}, {'code': '5.4.6', 'score': 'Unknown', 'severity': 'Unknown', 'timing': 'Ongoing', 'title': 'Motivation Unknown/Unrecorded', 'invasive': None, 'scope': 'Majority (50-90%)'}]	The species is threatened by destructive fishing techniques, such as dynamite and poisoning.
169607	ACTINOPTERYGII	CYPRINIFORMES	BALITORIDAE	Schistura	callichromus	Data Deficient	Freshwater (=Inland waters)	[{'habitat': 'Wetlands (inland) - Permanent Rivers/Streams/Creeks (includes waterfalls)', 'code': '5.1', 'season': None, 'suitability': 'Suitable', 'majorimportance': 'Yes'}]	[]	The threats to this species are unknown.
169632	ACTINOPTERYGII	SILURIFORMES	ARIIDAE	Plicofollis	dussumieri	Least Concern	Freshwater (=Inland waters)|Marine	[{'habitat': 'Marine Intertidal - Mangrove Submerged Roots', 'code': '12.7', 'season': None, 'suitability': 'Suitable', 'majorimportance': None}, {'habitat': 'Wetlands (inland) - Permanent Rivers/Streams/Creeks (includes waterfalls)', 'code': '5.1', 'season': None, 'suitability': 'Suitable', 'majorimportance': None}, {'habitat': 'Marine Neritic - Estuaries', 'code': '9.10', 'season': None, 'suita…	[]	There are no threats currently known for this species. Although the species is known to be harvested for food, it is not thought to be at a rate to cause concern.
170154	ACTINOPTERYGII	PERCIFORMES	SPARIDAE	Diplodus	argenteus	Least Concern	Marine	[{'habitat': 'Marine Neritic - Subtidal Rock and Rocky Reefs', 'code': '9.2', 'season': 'unknown', 'suitability': 'Suitable', 'majorimportance': 'Yes'}, {'habitat': 'Marine Neritic - Subtidal Loose Rock/pebble/gravel', 'code': '9.3', 'season': 'unknown', 'suitability': 'Suitable', 'majorimportance': 'Yes'}, {'habitat': 'Marine Neritic - Seagrass (Submerged)', 'code': '9.9', 'season': 'unknown', '…	[{'code': '7.3', 'score': 'Unknown', 'severity': 'Unknown', 'timing': 'Ongoing', 'title': 'Other ecosystem modifications', 'invasive': None, 'scope': 'Unknown'}]	Currently, no major threats have been identified for this species; however, the ongoing degradation of coastal ecosystems may lead to habitat loss for <em>D. argenteus.&#160;</em>
170156	ACTINOPTERYGII	PERCIFORMES	SPARIDAE	Archosargus	rhomboidalis	Least Concern	Marine	[{'habitat': 'Marine Intertidal - Mangrove Submerged Roots', 'code': '12.7', 'season': 'unknown', 'suitability': 'Suitable', 'majorimportance': 'Yes'}, {'habitat': 'Marine Neritic - Estuaries', 'code': '9.10', 'season': 'unknown', 'suitability': 'Suitable', 'majorimportance': 'Yes'}, {'habitat': 'Marine Neritic - Subtidal Sandy', 'code': '9.4', 'season': 'unknown', 'suitability': 'Suitable', 'maj…	[{'code': '1.1', 'score': 'Unknown', 'severity': 'Unknown', 'timing': 'Ongoing', 'title': 'Housing & urban areas', 'invasive': None, 'scope': 'Unknown'}, {'code': '1.2', 'score': 'Unknown', 'severity': 'Unknown', 'timing': 'Ongoing', 'title': 'Commercial & industrial areas', 'invasive': None, 'scope': 'Unknown'}, {'code': '1.3', 'score': 'Unknown', 'severity': 'Unknown', 'timing': 'Ongoing', 'tit…	There may be some negative impacts to its mangrove and seagrass habitats in parts of its range. In addition, there is potential for localized population declines from fishing.
170157	ACTINOPTERYGII	PERCIFORMES	SPARIDAE	Dentex	spariformis	Least Concern	Marine	[]	[{'code': '5.4', 'score': 'Unknown', 'severity': 'Unknown', 'timing': 'Ongoing', 'title': 'Fishing & harvesting aquatic resources', 'invasive': None, 'scope': 'Unknown'}, {'code': '5.4.1', 'score': 'Unknown', 'severity': 'Unknown', 'timing': 'Ongoing', 'title': 'Intentional use: (subsistence/small scale) [harvest]', 'invasive': None, 'scope': 'Unknown'}, {'code': '5.4.4', 'score': 'Unknown', 'sev…	<em>Dentex spariformis</em> is caught as by-catch in the deep water trawl fishery off north-western Australia, and this fishery is considered to be only a minor potential threat to this species.
170158	ACTINOPTERYGII	PERCIFORMES	SPARIDAE	Dentex	angolensis	Near Threatened	Marine	[{'habitat': 'Marine Neritic - Subtidal Sandy', 'code': '9.4', 'season': 'unknown', 'suitability': 'Suitable', 'majorimportance': 'Yes'}, {'habitat': 'Marine Neritic - Subtidal Sandy-Mud', 'code': '9.5', 'season': 'unknown', 'suitability': 'Suitable', 'majorimportance': 'Yes'}, {'habitat': 'Marine Neritic - Subtidal Muddy', 'code': '9.6', 'season': 'unknown', 'suitability': 'Suitable', 'majorimpo…	[{'code': '5.4', 'score': 'Low Impact: 3', 'severity': None, 'timing': 'Ongoing', 'title': 'Fishing & harvesting aquatic resources', 'invasive': None, 'scope': None}, {'code': '5.4.1', 'score': 'Low Impact: 3', 'severity': None, 'timing': 'Ongoing', 'title': 'Intentional use: (subsistence/small scale) [harvest]', 'invasive': None, 'scope': None}, {'code': '5.4.2', 'score': 'Low Impact: 3', 'sever…	<em>Dentex angolensis</em>&#160;has experienced substantial population declines in the past 25 years off Mauritania and may be vulnerable to over fishing in other parts of the region. Annual declines of 10% have been recorded for this species off Mauritania.&#160;The wild-caught economic value of this species could drive their overexploitation as the open-access nature of Ghanian fisheries is not…
170159	ACTINOPTERYGII	PERCIFORMES	SPARIDAE	Pagrus	caeruleostictus	Least Concern	Marine	[{'habitat': 'Marine Neritic - Subtidal Rock and Rocky Reefs', 'code': '9.2', 'season': 'unknown', 'suitability': 'Suitable', 'majorimportance': 'Yes'}, {'habitat': 'Marine Neritic - Subtidal Loose Rock/pebble/gravel', 'code': '9.3', 'season': 'unknown', 'suitability': 'Suitable', 'majorimportance': 'Yes'}, {'habitat': 'Marine Neritic - Subtidal Sandy', 'code': '9.4', 'season': 'unknown', 'suitab…	[{'code': '5.4', 'score': 'Unknown', 'severity': 'Unknown', 'timing': 'Ongoing', 'title': 'Fishing & harvesting aquatic resources', 'invasive': None, 'scope': 'Unknown'}, {'code': '5.4.1', 'score': 'Unknown', 'severity': 'Unknown', 'timing': 'Ongoing', 'title': 'Intentional use: (subsistence/small scale) [harvest]', 'invasive': None, 'scope': 'Unknown'}]	Potential localized declines from fishing may threaten this species as it is of high value and a component of commercial, recreational and artisanal fisheries.
170160	ACTINOPTERYGII	PERCIFORMES	SPARIDAE	Lithognathus	mormyrus	Least Concern	Marine	[{'habitat': 'Marine Neritic - Subtidal Rock and Rocky Reefs', 'code': '9.2', 'season': 'unknown', 'suitability': 'Marginal', 'majorimportance': None}, {'habitat': 'Marine Neritic - Subtidal Loose Rock/pebble/gravel', 'code': '9.3', 'season': 'unknown', 'suitability': 'Marginal', 'majorimportance': None}, {'habitat': 'Marine Neritic - Subtidal Sandy', 'code': '9.4', 'season': 'unknown', 'suitabil…	[{'code': '5.4', 'score': 'Unknown', 'severity': 'Unknown', 'timing': 'Ongoing', 'title': 'Fishing & harvesting aquatic resources', 'invasive': None, 'scope': 'Unknown'}, {'code': '5.4.1', 'score': 'Unknown', 'severity': 'Unknown', 'timing': 'Ongoing', 'title': 'Intentional use: (subsistence/small scale) [harvest]', 'invasive': None, 'scope': 'Unknown'}]	Catches of <span style="font-style: italic;">L. mormyrus</span> have been declining in the Canary Islands during the past few years (Pajuelo <span style="font-style: italic;">et al. </span>2002) and in Angola (FAO catch landings). Fishing effort in the Mediterranean has increased (Vitale <em>et al.</em> 2011), especially in the eastern Mediterranean. In a study assessing the factors affecting mor…
170161	ACTINOPTERYGII	PERCIFORMES	SPARIDAE	Cheimerius	matsubarai	Vulnerable	Marine	[]	[{'code': '5.4', 'score': 'Unknown', 'severity': 'Unknown', 'timing': 'Ongoing', 'title': 'Fishing & harvesting aquatic resources', 'invasive': None, 'scope': 'Unknown'}, {'code': '5.4.1', 'score': 'Unknown', 'severity': 'Unknown', 'timing': 'Ongoing', 'title': 'Intentional use: (subsistence/small scale) [harvest]', 'invasive': None, 'scope': 'Unknown'}]	This species is impacted by directed commercial and recreational fisheries.
170162	ACTINOPTERYGII	PERCIFORMES	SPARIDAE	Pagellus	bellottii	Least Concern	Marine	[{'habitat': 'Marine Neritic - Subtidal Rock and Rocky Reefs', 'code': '9.2', 'season': 'unknown', 'suitability': 'Suitable', 'majorimportance': 'Yes'}, {'habitat': 'Marine Neritic - Subtidal Sandy', 'code': '9.4', 'season': 'unknown', 'suitability': 'Suitable', 'majorimportance': 'Yes'}]	[{'code': '5.4', 'score': 'Unknown', 'severity': 'Unknown', 'timing': 'Ongoing', 'title': 'Fishing & harvesting aquatic resources', 'invasive': None, 'scope': 'Unknown'}, {'code': '5.4.1', 'score': 'Unknown', 'severity': 'Unknown', 'timing': 'Ongoing', 'title': 'Intentional use: (subsistence/small scale) [harvest]', 'invasive': None, 'scope': 'Unknown'}, {'code': '5.4.2', 'score': 'Unknown', 'sev…	There have been substantial declines reported from coastal demersal fisheries in West Africa.
170163	ACTINOPTERYGII	PERCIFORMES	SPARIDAE	Sparidentex	datnia	Data Deficient	Marine	[{'habitat': 'Marine Neritic - Estuaries', 'code': '9.10', 'season': 'unknown', 'suitability': 'Suitable', 'majorimportance': 'Yes'}]	[{'code': '11.5', 'score': 'Unknown', 'severity': 'Unknown', 'timing': 'Ongoing', 'title': 'Other impacts', 'invasive': None, 'scope': 'Unknown'}, {'code': '9.3', 'score': 'Unknown', 'severity': 'Unknown', 'timing': 'Ongoing', 'title': 'Agricultural & forestry effluents', 'invasive': None, 'scope': 'Unknown'}, {'code': '9.3.4', 'score': 'Unknown', 'severity': 'Unknown', 'timing': 'Ongoing', 'titl…	There are no major threats known for this species; however, this species may be susceptible to habitat loss and degradation as it inhabits estuary environments.
170164	ACTINOPTERYGII	PERCIFORMES	SPARIDAE	Rhabdosargus	thorpei	Least Concern	Marine	[{'habitat': 'Marine Neritic - Estuaries', 'code': '9.10', 'season': 'unknown', 'suitability': 'Suitable', 'majorimportance': 'Yes'}, {'habitat': 'Marine Neritic - Subtidal Rock and Rocky Reefs', 'code': '9.2', 'season': 'unknown', 'suitability': 'Suitable', 'majorimportance': 'Yes'}, {'habitat': 'Marine Neritic - Subtidal Loose Rock/pebble/gravel', 'code': '9.3', 'season': 'unknown', 'suitabilit…	[{'code': '7.3', 'score': 'Unknown', 'severity': 'Unknown', 'timing': 'Future', 'title': 'Other ecosystem modifications', 'invasive': None, 'scope': 'Unknown'}]	No major threats are known for&#160;<em>Rhabdosargus thorpei</em>; fishing is likely the main threat outside of marine protected areas; however, habitat degradation, especially to estuaries and coral reefs, may be a threat in the future (B. Mann pers. comm.)
170165	ACTINOPTERYGII	PERCIFORMES	SPARIDAE	Rhabdosargus	haffara	Least Concern	Marine	[{'habitat': 'Marine Neritic - Subtidal Sandy', 'code': '9.4', 'season': 'unknown', 'suitability': 'Suitable', 'majorimportance': 'Yes'}, {'habitat': 'Marine Neritic - Subtidal Sandy-Mud', 'code': '9.5', 'season': 'unknown', 'suitability': 'Suitable', 'majorimportance': 'Yes'}]	[{'code': '5.4', 'score': 'Unknown', 'severity': 'Unknown', 'timing': 'Ongoing', 'title': 'Fishing & harvesting aquatic resources', 'invasive': None, 'scope': 'Unknown'}, {'code': '5.4.1', 'score': 'Unknown', 'severity': 'Unknown', 'timing': 'Ongoing', 'title': 'Intentional use: (subsistence/small scale) [harvest]', 'invasive': None, 'scope': 'Unknown'}, {'code': '5.4.2', 'score': 'Unknown', 'sev…	There are no major threats known for this species, however, it is captured as bycatch in shrimp trawls (Chen <em>et al.</em> 2012) and may be susceptible to localized overfishing in parts of its range (e.g., Persian Gulf).
170166	ACTINOPTERYGII	PERCIFORMES	SPARIDAE	Dentex	maroccanus	Least Concern	Marine	[{'habitat': 'Marine Neritic - Subtidal Loose Rock/pebble/gravel', 'code': '9.3', 'season': 'unknown', 'suitability': 'Suitable', 'majorimportance': 'Yes'}, {'habitat': 'Marine Neritic - Subtidal Sandy', 'code': '9.4', 'season': 'unknown', 'suitability': 'Suitable', 'majorimportance': 'No'}, {'habitat': 'Marine Neritic - Subtidal Sandy-Mud', 'code': '9.5', 'season': 'unknown', 'suitability': 'Sui…	[{'code': '5.4', 'score': 'Unknown', 'severity': 'Unknown', 'timing': 'Future', 'title': 'Fishing & harvesting aquatic resources', 'invasive': None, 'scope': 'Unknown'}, {'code': '5.4.1', 'score': 'Unknown', 'severity': 'Unknown', 'timing': 'Future', 'title': 'Intentional use: (subsistence/small scale) [harvest]', 'invasive': None, 'scope': 'Unknown'}, {'code': '5.4.2', 'score': 'Unknown', 'sever…	There are no major threats known for<em>&#160;D. maroccanus</em>&#160;but potential localized declines from fishing are likely.
170167	ACTINOPTERYGII	PERCIFORMES	SPARIDAE	Pagrus	major	Least Concern	Marine	[{'habitat': 'Marine Neritic - Estuaries', 'code': '9.10', 'season': 'unknown', 'suitability': 'Suitable', 'majorimportance': 'Yes'}, {'habitat': 'Marine Neritic - Subtidal Rock and Rocky Reefs', 'code': '9.2', 'season': 'unknown', 'suitability': 'Suitable', 'majorimportance': 'No'}, {'habitat': 'Marine Neritic - Subtidal Loose Rock/pebble/gravel', 'code': '9.3', 'season': 'unknown', 'suitability…	[{'code': '2.4', 'score': 'Unknown', 'severity': 'Unknown', 'timing': 'Ongoing', 'title': 'Marine & freshwater aquaculture', 'invasive': None, 'scope': 'Unknown'}, {'code': '2.4.1', 'score': 'Unknown', 'severity': 'Unknown', 'timing': 'Ongoing', 'title': 'Subsistence/artisinal aquaculture', 'invasive': None, 'scope': 'Unknown'}, {'code': '2.4.2', 'score': 'Unknown', 'severity': 'Unknown', 'timing…	Possible habitat degradation in juvenile estuarine habitat, water pollution and overfishing are threats to this species. There is a possibility of genetic pollution of the wild stocks by the release of hatchery raised fish (Perez-Enriquez <em>et al.</em>&#160;1999).
170168	ACTINOPTERYGII	PERCIFORMES	SPARIDAE	Stenotomus	chrysops	Near Threatened	Marine	[{'habitat': 'Artificial/Marine - Marine Anthropogenic Structures', 'code': '15.11', 'season': 'unknown', 'suitability': 'Suitable', 'majorimportance': 'Yes'}, {'habitat': 'Marine Neritic - Estuaries', 'code': '9.10', 'season': 'unknown', 'suitability': 'Suitable', 'majorimportance': 'Yes'}, {'habitat': 'Marine Neritic - Subtidal Rock and Rocky Reefs', 'code': '9.2', 'season': 'unknown', 'suitabi…	[{'code': '5.4', 'score': 'Low Impact: 3', 'severity': None, 'timing': 'Ongoing', 'title': 'Fishing & harvesting aquatic resources', 'invasive': None, 'scope': None}, {'code': '5.4.1', 'score': 'Low Impact: 3', 'severity': None, 'timing': 'Ongoing', 'title': 'Intentional use: (subsistence/small scale) [harvest]', 'invasive': None, 'scope': None}, {'code': '5.4.2', 'score': 'Low Impact: 3', 'sever…	<em>Stenotomus chrysops </em>is an important recreational and commercial species with&#160;declines in landings and SSB observed in the past. This species was previously believed to be overfished but has made some recovery due to reduced fishing mortality, improved recruitment and the implementation of broad scale Gear Restricted Areas (Steimle <em>et al.</em> 1999, Terceiro 2012, Linton and Terc…
170169	ACTINOPTERYGII	PERCIFORMES	SPARIDAE	Sarpa	salpa	Least Concern	Marine	[{'habitat': 'Marine Neritic - Subtidal Rock and Rocky Reefs', 'code': '9.2', 'season': 'unknown', 'suitability': 'Suitable', 'majorimportance': 'Yes'}, {'habitat': 'Marine Neritic - Subtidal Loose Rock/pebble/gravel', 'code': '9.3', 'season': 'unknown', 'suitability': 'Suitable', 'majorimportance': 'Yes'}, {'habitat': 'Marine Neritic - Subtidal Sandy', 'code': '9.4', 'season': 'unknown', 'suitab…	[{'code': '5.4', 'score': 'Low Impact: 3', 'severity': None, 'timing': 'Ongoing', 'title': 'Fishing & harvesting aquatic resources', 'invasive': None, 'scope': None}, {'code': '5.4.1', 'score': 'Low Impact: 3', 'severity': None, 'timing': 'Ongoing', 'title': 'Intentional use: (subsistence/small scale) [harvest]', 'invasive': None, 'scope': None}, {'code': '5.4.2', 'score': 'Low Impact: 3', 'sever…	Major threats have not been identified for <em>S. salpa </em>but fishing may become a threat<em>.&#160;</em>
170170	ACTINOPTERYGII	PERCIFORMES	SPARIDAE	Chrysoblephus	laticeps	Near Threatened	Marine	[{'habitat': 'Marine Neritic - Subtidal Rock and Rocky Reefs', 'code': '9.2', 'season': 'unknown', 'suitability': 'Suitable', 'majorimportance': 'Yes'}, {'habitat': 'Marine Neritic - Subtidal Loose Rock/pebble/gravel', 'code': '9.3', 'season': 'unknown', 'suitability': 'Suitable', 'majorimportance': 'Yes'}]	[{'code': '5.4', 'score': 'Unknown', 'severity': 'Unknown', 'timing': 'Ongoing', 'title': 'Fishing & harvesting aquatic resources', 'invasive': None, 'scope': 'Unknown'}, {'code': '5.4.1', 'score': 'Unknown', 'severity': 'Unknown', 'timing': 'Ongoing', 'title': 'Intentional use: (subsistence/small scale) [harvest]', 'invasive': None, 'scope': 'Unknown'}, {'code': '5.4.2', 'score': 'Unknown', 'sev…	<em>Chrysoblephus laticeps&#160;</em>is currently considered to be overexploited (Griffiths 2000) and although MPAs have provided protection for this species, some illegal fishing still occurs within them (GÃ¶tz<em>&#160;et al.</em>&#160;2008b).&#160;<em>Chrysoblephus laticeps</em>&#160;is&#160;vulnerable to overexploitation due to life history attributes including its sedentary and philopatric n…
170171	ACTINOPTERYGII	PERCIFORMES	SPARIDAE	Boops	lineatus	Data Deficient	Marine	[{'habitat': 'Marine Neritic - Subtidal Rock and Rocky Reefs', 'code': '9.2', 'season': 'unknown', 'suitability': 'Suitable', 'majorimportance': 'Yes'}, {'habitat': 'Marine Neritic - Subtidal Sandy', 'code': '9.4', 'season': 'unknown', 'suitability': 'Suitable', 'majorimportance': 'Yes'}, {'habitat': 'Marine Neritic - Subtidal Sandy-Mud', 'code': '9.5', 'season': 'unknown', 'suitability': 'Suitab…	[]	There are no major threats known for this species.
170172	ACTINOPTERYGII	PERCIFORMES	SPARIDAE	Spondyliosoma	emarginatum	Least Concern	Marine	[{'habitat': 'Marine Neritic - Subtidal Rock and Rocky Reefs', 'code': '9.2', 'season': 'unknown', 'suitability': 'Suitable', 'majorimportance': 'Yes'}]	[]	Currently, no major threats have been identified for&#160;<em>Spondyliosoma emarginatum.</em>
170173	ACTINOPTERYGII	PERCIFORMES	SPARIDAE	Acanthopagrus	vagus	Vulnerable	Marine	[{'habitat': 'Marine Intertidal - Mangrove Submerged Roots', 'code': '12.7', 'season': 'unknown', 'suitability': 'Suitable', 'majorimportance': 'Yes'}, {'habitat': 'Marine Coastal/Supratidal - Coastal Freshwater Lakes', 'code': '13.5', 'season': 'unknown', 'suitability': 'Suitable', 'majorimportance': 'Yes'}, {'habitat': 'Marine Neritic - Estuaries', 'code': '9.10', 'season': 'unknown', 'suitabil…	[{'code': '11.1', 'score': 'Low Impact: 3', 'severity': None, 'timing': 'Ongoing', 'title': 'Habitat shifting & alteration', 'invasive': None, 'scope': None}, {'code': '5.4', 'score': 'Low Impact: 3', 'severity': None, 'timing': 'Ongoing', 'title': 'Fishing & harvesting aquatic resources', 'invasive': None, 'scope': None}, {'code': '5.4.1', 'score': 'Low Impact: 3', 'severity': None, 'timing': 'O…	Currently,&#160;<em>A. vagus</em> is heavily overexploited in the Kosi system and the stock is considered to have collapsed (James <em>et al.</em>&#160;2008). Minimum size and bag limit regulations appear to be ineffective as there is inadequate compliance with regulations in the trap and gillnet fisheries as they are poorly managed. The recent rapid and uncontrolled escalation of fishing effort …
170174	ACTINOPTERYGII	PERCIFORMES	SPARIDAE	Sparidentex	hasta	Least Concern	Marine	[{'habitat': 'Marine Neritic - Subtidal Loose Rock/pebble/gravel', 'code': '9.3', 'season': 'unknown', 'suitability': 'Suitable', 'majorimportance': 'Yes'}, {'habitat': 'Marine Neritic - Subtidal Sandy', 'code': '9.4', 'season': 'unknown', 'suitability': 'Suitable', 'majorimportance': 'Yes'}, {'habitat': 'Marine Neritic - Subtidal Sandy-Mud', 'code': '9.5', 'season': 'unknown', 'suitability': 'Su…	[{'code': '5.4', 'score': 'Unknown', 'severity': 'Unknown', 'timing': 'Ongoing', 'title': 'Fishing & harvesting aquatic resources', 'invasive': None, 'scope': 'Unknown'}, {'code': '5.4.1', 'score': 'Unknown', 'severity': 'Unknown', 'timing': 'Ongoing', 'title': 'Intentional use: (subsistence/small scale) [harvest]', 'invasive': None, 'scope': 'Unknown'}, {'code': '5.4.2', 'score': 'Unknown', 'sev…	There are no major threats known for&#160;<em>Sparidentex hasta</em>, though it is targeted by artisanal and commercial fisheries in the Persian Gulf.
170175	ACTINOPTERYGII	PERCIFORMES	SPARIDAE	Diplodus	capensis	Least Concern	Marine	[{'habitat': 'Marine Intertidal - Rocky Shoreline', 'code': '12.1', 'season': 'unknown', 'suitability': 'Suitable', 'majorimportance': 'Yes'}, {'habitat': 'Marine Intertidal - Sandy Shoreline and/or Beaches, Sand Bars, Spits, Etc', 'code': '12.2', 'season': 'unknown', 'suitability': 'Suitable', 'majorimportance': 'Yes'}, {'habitat': 'Marine Intertidal - Shingle and/or Pebble Shoreline and/or Beac…	[{'code': '11.3', 'score': 'Unknown', 'severity': 'Unknown', 'timing': 'Ongoing', 'title': 'Temperature extremes', 'invasive': None, 'scope': 'Unknown'}, {'code': '11.5', 'score': 'Unknown', 'severity': 'Unknown', 'timing': 'Ongoing', 'title': 'Other impacts', 'invasive': None, 'scope': 'Unknown'}, {'code': '5.4', 'score': 'Unknown', 'severity': 'Unknown', 'timing': 'Ongoing', 'title': 'Fishing &…	<em>Diplodus capensis </em>exhibits a number of life history attributes that make this species potentially vulnerable to overexploitation including: longevity, hermaphroditism, and residency. In addition, this species is heavily targeted by recreational and subsistence shore fishers (Brouwer <em>et al.</em>&#160;1997,&#160;Mann and Dunlop 2012).&#160;The hook and line fishery targets larger indiv…
170176	ACTINOPTERYGII	PERCIFORMES	SPARIDAE	Dentex	abei	Least Concern	Marine	[{'habitat': 'Marine Neritic - Subtidal Rock and Rocky Reefs', 'code': '9.2', 'season': 'unknown', 'suitability': 'Suitable', 'majorimportance': 'Yes'}]	[{'code': '5.4', 'score': 'Unknown', 'severity': 'Unknown', 'timing': 'Ongoing', 'title': 'Fishing & harvesting aquatic resources', 'invasive': None, 'scope': 'Unknown'}, {'code': '5.4.1', 'score': 'Unknown', 'severity': 'Unknown', 'timing': 'Ongoing', 'title': 'Intentional use: (subsistence/small scale) [harvest]', 'invasive': None, 'scope': 'Unknown'}]	Off of Amami and Okinawa Islands, capture of this species has led to reduction in average size from about 45 TL to ~30 cm TL (Y. Iwatsuki pers. comm. 2009).
170177	ACTINOPTERYGII	PERCIFORMES	SPARIDAE	Calamus	mu	Least Concern	Marine	[{'habitat': 'Marine Neritic - Subtidal Sandy', 'code': '9.4', 'season': 'unknown', 'suitability': 'Suitable', 'majorimportance': 'Yes'}, {'habitat': 'Marine Neritic - Subtidal Sandy-Mud', 'code': '9.5', 'season': 'unknown', 'suitability': 'Suitable', 'majorimportance': 'Yes'}]	[{'code': '5.4', 'score': 'Unknown', 'severity': 'Unknown', 'timing': 'Ongoing', 'title': 'Fishing & harvesting aquatic resources', 'invasive': None, 'scope': 'Unknown'}, {'code': '5.4.1', 'score': 'Unknown', 'severity': 'Unknown', 'timing': 'Ongoing', 'title': 'Intentional use: (subsistence/small scale) [harvest]', 'invasive': None, 'scope': 'Unknown'}]	There are no major threats known for this species. There is a potential threat of overfishing to this species as it is only known from the coast of Brazil.
170178	ACTINOPTERYGII	PERCIFORMES	SPARIDAE	Calamus	nodosus	Least Concern	Marine	[{'habitat': 'Artificial/Marine - Marine Anthropogenic Structures', 'code': '15.11', 'season': 'unknown', 'suitability': 'Suitable', 'majorimportance': 'Yes'}, {'habitat': 'Marine Neritic - Subtidal Rock and Rocky Reefs', 'code': '9.2', 'season': 'unknown', 'suitability': 'Suitable', 'majorimportance': 'Yes'}, {'habitat': 'Outer Reef Channel', 'code': '9.8.1', 'season': 'unknown', 'suitability': …	[{'code': '5.4', 'score': 'Unknown', 'severity': 'Unknown', 'timing': 'Future', 'title': 'Fishing & harvesting aquatic resources', 'invasive': None, 'scope': 'Unknown'}, {'code': '5.4.1', 'score': 'Unknown', 'severity': 'Unknown', 'timing': 'Future', 'title': 'Intentional use: (subsistence/small scale) [harvest]', 'invasive': None, 'scope': 'Unknown'}, {'code': '5.4.2', 'score': 'Unknown', 'sever…	There are no major threats known for this species at present time. However, there is potential for localized declines from fishing.
170179	ACTINOPTERYGII	PERCIFORMES	SPARIDAE	Acanthopagrus	chinshira	Near Threatened	Marine	[{'habitat': 'Marine Coastal/Supratidal - Coastal Brackish/Saline Lagoons/Marine Lakes', 'code': '13.4', 'season': 'unknown', 'suitability': 'Suitable', 'majorimportance': 'Yes'}, {'habitat': 'Marine Neritic - Estuaries', 'code': '9.10', 'season': 'unknown', 'suitability': 'Suitable', 'majorimportance': 'Yes'}]	[{'code': '5.4', 'score': 'Unknown', 'severity': 'Unknown', 'timing': 'Ongoing', 'title': 'Fishing & harvesting aquatic resources', 'invasive': None, 'scope': 'Unknown'}, {'code': '5.4.1', 'score': 'Unknown', 'severity': 'Unknown', 'timing': 'Ongoing', 'title': 'Intentional use: (subsistence/small scale) [harvest]', 'invasive': None, 'scope': 'Unknown'}, {'code': '7.3', 'score': 'Unknown', 'sever…	Major threats to&#160;<em>A. chinshira</em>&#160;include degradation to estuarine habitat, particularly in Taiwan&#160;(Huang and Lin 2003, Peng&#160;<em>et al</em>. 2007), and possible overfishing of restricted subpopulations.
170180	ACTINOPTERYGII	PERCIFORMES	SPARIDAE	Stenotomus	caprinus	Least Concern	Marine	[{'habitat': 'Marine Neritic - Subtidal Sandy', 'code': '9.4', 'season': 'unknown', 'suitability': 'Suitable', 'majorimportance': 'Yes'}, {'habitat': 'Marine Neritic - Subtidal Sandy-Mud', 'code': '9.5', 'season': 'unknown', 'suitability': 'Suitable', 'majorimportance': 'Yes'}, {'habitat': 'Marine Neritic - Subtidal Muddy', 'code': '9.6', 'season': 'unknown', 'suitability': 'Suitable', 'majorimpo…	[{'code': '5.4', 'score': 'Unknown', 'severity': 'Unknown', 'timing': 'Ongoing', 'title': 'Fishing & harvesting aquatic resources', 'invasive': None, 'scope': 'Unknown'}, {'code': '5.4.3', 'score': 'Unknown', 'severity': 'Unknown', 'timing': 'Ongoing', 'title': 'Unintentional effects: (subsistence/small scale) [harvest]', 'invasive': None, 'scope': 'Unknown'}, {'code': '5.4.4', 'score': 'Unknown'…	<em>Stenotomus caprinus </em>is a major bycatch component of shrimp trawl fisheries in the Gulf of Mexico, this may lead to localized population declines in parts of its range.
170181	ACTINOPTERYGII	PERCIFORMES	SPARIDAE	Acanthopagrus	palmaris	Least Concern	Marine	[{'habitat': 'Marine Neritic - Estuaries', 'code': '9.10', 'season': 'unknown', 'suitability': 'Suitable', 'majorimportance': 'Yes'}, {'habitat': 'Marine Neritic - Subtidal Sandy-Mud', 'code': '9.5', 'season': 'unknown', 'suitability': 'Suitable', 'majorimportance': 'No'}, {'habitat': 'Marine Neritic - Subtidal Muddy', 'code': '9.6', 'season': 'unknown', 'suitability': 'Suitable', 'majorimportanc…	[{'code': '11.1', 'score': 'Unknown', 'severity': 'Unknown', 'timing': 'Ongoing', 'title': 'Habitat shifting & alteration', 'invasive': None, 'scope': 'Unknown'}, {'code': '6.3', 'score': 'Unknown', 'severity': 'Unknown', 'timing': 'Ongoing', 'title': 'Work & other activities', 'invasive': None, 'scope': 'Unknown'}, {'code': '7.2', 'score': 'Unknown', 'severity': 'Unknown', 'timing': 'Ongoing', '…	There are no major threats known for this species; however, this species may be vulnerable to habitat degradation due to climate change and anthropogenic activities, as it inhabits shallow coastal waters and estuaries.
170182	ACTINOPTERYGII	PERCIFORMES	SPARIDAE	Calamus	proridens	Least Concern	Marine	[{'habitat': 'Artificial/Marine - Marine Anthropogenic Structures', 'code': '15.11', 'season': 'unknown', 'suitability': 'Suitable', 'majorimportance': 'No'}, {'habitat': 'Marine Neritic - Subtidal Rock and Rocky Reefs', 'code': '9.2', 'season': 'unknown', 'suitability': 'Suitable', 'majorimportance': 'Yes'}, {'habitat': 'Outer Reef Channel', 'code': '9.8.1', 'season': 'unknown', 'suitability': '…	[{'code': '5.4', 'score': 'Unknown', 'severity': 'Unknown', 'timing': 'Future', 'title': 'Fishing & harvesting aquatic resources', 'invasive': None, 'scope': 'Unknown'}, {'code': '5.4', 'score': 'Unknown', 'severity': 'Unknown', 'timing': 'Ongoing', 'title': 'Fishing & harvesting aquatic resources', 'invasive': None, 'scope': 'Unknown'}, {'code': '5.4.1', 'score': 'Unknown', 'severity': 'Unknown'…	There are no major threats known for this species at present time. However, there is potential for localized declines from fishing and as bycatch from the shrimp trawl fishery.
170183	ACTINOPTERYGII	PERCIFORMES	SPARIDAE	Chrysoblephus	cristiceps	Critically Endangered	Marine	[{'habitat': 'Marine Neritic - Subtidal Rock and Rocky Reefs', 'code': '9.2', 'season': 'unknown', 'suitability': 'Suitable', 'majorimportance': 'Yes'}, {'habitat': 'Marine Neritic - Subtidal Loose Rock/pebble/gravel', 'code': '9.3', 'season': 'unknown', 'suitability': 'Suitable', 'majorimportance': 'Yes'}]	[{'code': '5.4', 'score': 'Unknown', 'severity': 'Unknown', 'timing': 'Ongoing', 'title': 'Fishing & harvesting aquatic resources', 'invasive': None, 'scope': 'Unknown'}, {'code': '5.4.1', 'score': 'Unknown', 'severity': 'Unknown', 'timing': 'Ongoing', 'title': 'Intentional use: (subsistence/small scale) [harvest]', 'invasive': None, 'scope': 'Unknown'}, {'code': '5.4.2', 'score': 'Unknown', 'sev…	<em>Chrysoblephus cristiceps</em> is vulnerable to exploitation as it is slow growing, long-lived and exhibits hermaphroditism (Buxton 1992, 1993) and has experienced significant population declines throughout its distributional range (Buxton and Mann 2013) including a fishery collapse (Buxton 1993). Individuals of this species are recruited into the fishery before maturity as sex change occurs a…
170184	ACTINOPTERYGII	PERCIFORMES	SPARIDAE	Polysteganus	praeorbitalis	Vulnerable	Marine	[{'habitat': 'Marine Neritic - Subtidal Rock and Rocky Reefs', 'code': '9.2', 'season': 'unknown', 'suitability': 'Suitable', 'majorimportance': 'Yes'}, {'habitat': 'Marine Neritic - Subtidal Loose Rock/pebble/gravel', 'code': '9.3', 'season': 'unknown', 'suitability': 'Suitable', 'majorimportance': 'Yes'}]	[{'code': '5.4', 'score': 'Unknown', 'severity': 'Unknown', 'timing': 'Ongoing', 'title': 'Fishing & harvesting aquatic resources', 'invasive': None, 'scope': 'Unknown'}, {'code': '5.4.1', 'score': 'Unknown', 'severity': 'Unknown', 'timing': 'Ongoing', 'title': 'Intentional use: (subsistence/small scale) [harvest]', 'invasive': None, 'scope': 'Unknown'}, {'code': '5.4.2', 'score': 'Unknown', 'sev…	<em>Polysteganus praeorbitalis</em>&#160;is vulnerable to overexploitation as is it targeted both commercially and recreationally and exhibits life history traits that exacerbates its risk of extinction. These characteristics include limited distribution, slow growth, high residency, late maturation, and suspected hermaphroditism (Garratt <em>et al.</em>&#160;1994, Mann <em>et al.</em>&#160;2005,…
170185	ACTINOPTERYGII	PERCIFORMES	SPARIDAE	Porcostoma	dentata	Least Concern	Marine	[{'habitat': 'Marine Neritic - Subtidal Rock and Rocky Reefs', 'code': '9.2', 'season': 'unknown', 'suitability': 'Suitable', 'majorimportance': 'Yes'}]	[]	<p>There are no major threats identified for this species.</p>
170186	ACTINOPTERYGII	PERCIFORMES	SPARIDAE	Dentex	gibbosus	Least Concern	Marine	[{'habitat': 'Marine Neritic - Subtidal Rock and Rocky Reefs', 'code': '9.2', 'season': 'unknown', 'suitability': 'Suitable', 'majorimportance': 'Yes'}, {'habitat': 'Marine Neritic - Subtidal Loose Rock/pebble/gravel', 'code': '9.3', 'season': 'unknown', 'suitability': 'Suitable', 'majorimportance': 'Yes'}, {'habitat': 'Marine Neritic - Subtidal Sandy', 'code': '9.4', 'season': 'unknown', 'suitab…	[]	There are no major threats known for this species. Potential localized declines from fishing are likely.
170187	ACTINOPTERYGII	PERCIFORMES	SPARIDAE	Calamus	campechanus	Data Deficient	Marine	[{'habitat': 'Marine Oceanic - Epipelagic (0-200m)', 'code': '10.1', 'season': None, 'suitability': None, 'majorimportance': None}]	[{'code': '11.1', 'score': 'Unknown', 'severity': 'Unknown', 'timing': 'Ongoing', 'title': 'Habitat shifting & alteration', 'invasive': None, 'scope': 'Unknown'}, {'code': '5.4', 'score': 'Unknown', 'severity': 'Unknown', 'timing': 'Ongoing', 'title': 'Fishing & harvesting aquatic resources', 'invasive': None, 'scope': 'Unknown'}, {'code': '5.4.1', 'score': 'Unknown', 'severity': 'Unknown', 'timi…	Potential localized declines from fishing and habitat loss may pose a threats to <em>C. campechanus </em>as it is&#160;an important food fish (Carpenter 2002). This species may also be vulnerable to habitat degradation from anthropogenic activities and climates change as it inhabits shallow coastal waters.
170189	ACTINOPTERYGII	PERCIFORMES	SPARIDAE	Acanthopagrus	butcheri	Least Concern	Freshwater (=Inland waters)|Marine	[{'habitat': 'Marine Neritic - Estuaries', 'code': '9.10', 'season': 'resident', 'suitability': 'Suitable', 'majorimportance': 'Yes'}]	[{'code': '1.1', 'score': 'Unknown', 'severity': 'Unknown', 'timing': 'Ongoing', 'title': 'Housing & urban areas', 'invasive': None, 'scope': 'Unknown'}, {'code': '11.1', 'score': 'Unknown', 'severity': 'Unknown', 'timing': 'Ongoing', 'title': 'Habitat shifting & alteration', 'invasive': None, 'scope': 'Unknown'}, {'code': '11.2', 'score': 'Unknown', 'severity': 'Unknown', 'timing': 'Ongoing', 't…	<em>Acanthopagrus butcheri</em> is susceptible to destruction and pollution of its estuarine habitat. <em>Acanthopagrus butcheri </em>is extremely susceptible to overfishing as their population cannot be supplemented by surrounding marine environments or other estuaries because they complete their entire life cycle in their natal estuarine habitat (Potter <em>et al</em>. 1996). Populations in the…
170190	ACTINOPTERYGII	PERCIFORMES	SPARIDAE	Calamus	bajonado	Least Concern	Marine	[{'habitat': 'Marine Neritic - Subtidal Rock and Rocky Reefs', 'code': '9.2', 'season': 'unknown', 'suitability': 'Suitable', 'majorimportance': 'Yes'}, {'habitat': 'Outer Reef Channel', 'code': '9.8.1', 'season': 'unknown', 'suitability': 'Suitable', 'majorimportance': 'Yes'}, {'habitat': 'Back Slope', 'code': '9.8.2', 'season': 'unknown', 'suitability': 'Suitable', 'majorimportance': 'Yes'}, {'…	[{'code': '1.1', 'score': 'Unknown', 'severity': 'Unknown', 'timing': 'Ongoing', 'title': 'Housing & urban areas', 'invasive': None, 'scope': 'Unknown'}, {'code': '1.2', 'score': 'Unknown', 'severity': 'Unknown', 'timing': 'Ongoing', 'title': 'Commercial & industrial areas', 'invasive': None, 'scope': 'Unknown'}, {'code': '5.4', 'score': 'Unknown', 'severity': 'Unknown', 'timing': 'Ongoing', 'tit…	<em>Calamus bajonado</em> may be negatively impacted by habitat degradation in parts of its distribution and some localized declines from directed fishing.
170191	ACTINOPTERYGII	PERCIFORMES	SPARIDAE	Argyrops	bleekeri	Least Concern	Marine	[{'habitat': 'Marine Neritic - Subtidal Sandy', 'code': '9.4', 'season': 'unknown', 'suitability': 'Suitable', 'majorimportance': 'Yes'}, {'habitat': 'Marine Neritic - Subtidal Sandy-Mud', 'code': '9.5', 'season': 'unknown', 'suitability': 'Suitable', 'majorimportance': 'Yes'}, {'habitat': 'Marine Neritic - Subtidal Muddy', 'code': '9.6', 'season': 'unknown', 'suitability': 'Suitable', 'majorimpo…	[{'code': '5.4', 'score': 'Unknown', 'severity': 'Unknown', 'timing': 'Unknown', 'title': 'Fishing & harvesting aquatic resources', 'invasive': None, 'scope': 'Unknown'}, {'code': '5.4.1', 'score': 'Unknown', 'severity': 'Unknown', 'timing': 'Unknown', 'title': 'Intentional use: (subsistence/small scale) [harvest]', 'invasive': None, 'scope': 'Unknown'}, {'code': '5.4.2', 'score': 'Unknown', 'sev…	<em>Argyrops bleekeri </em>may be susceptible to overexploitation.
170192	ACTINOPTERYGII	PERCIFORMES	SPARIDAE	Dentex	canariensis	Least Concern	Marine	[{'habitat': 'Marine Neritic - Subtidal Rock and Rocky Reefs', 'code': '9.2', 'season': 'unknown', 'suitability': 'Suitable', 'majorimportance': 'Yes'}, {'habitat': 'Marine Neritic - Subtidal Loose Rock/pebble/gravel', 'code': '9.3', 'season': 'unknown', 'suitability': 'Suitable', 'majorimportance': 'Yes'}, {'habitat': 'Marine Neritic - Subtidal Sandy', 'code': '9.4', 'season': 'unknown', 'suitab…	[{'code': '5.4', 'score': 'Unknown', 'severity': 'Unknown', 'timing': 'Ongoing', 'title': 'Fishing & harvesting aquatic resources', 'invasive': None, 'scope': 'Unknown'}, {'code': '5.4.1', 'score': 'Unknown', 'severity': 'Unknown', 'timing': 'Ongoing', 'title': 'Intentional use: (subsistence/small scale) [harvest]', 'invasive': None, 'scope': 'Unknown'}, {'code': '5.4.2', 'score': 'Unknown', 'sev…	There was an observed reduction in density of snappers, groupers, seabreams and Atlantic bigeye (<span style="font-style: italic;">Priacanthus arenatus</span>) between 1963 and 1964 and in the early 1980s reported from trawling surveys in Ghanaian waters from 1956 to 1990. The observed changes in the composition and relative importance of species in the assemblages can be related to increased fis…
170193	ACTINOPTERYGII	PERCIFORMES	SPARIDAE	Gymnocrotaphus	curvidens	Least Concern	Marine	[{'habitat': 'Marine Intertidal - Rocky Shoreline', 'code': '12.1', 'season': 'unknown', 'suitability': 'Suitable', 'majorimportance': 'Yes'}, {'habitat': 'Marine Intertidal - Tidepools', 'code': '12.6', 'season': 'unknown', 'suitability': 'Suitable', 'majorimportance': 'Yes'}, {'habitat': 'Marine Neritic - Subtidal Rock and Rocky Reefs', 'code': '9.2', 'season': 'unknown', 'suitability': 'Suitab…	[]	Currently, no major threats have been identified for <em>G. curvidens.&#160;</em>
170194	ACTINOPTERYGII	PERCIFORMES	SPARIDAE	Chrysoblephus	anglicus	Near Threatened	Marine	[{'habitat': 'Marine Neritic - Subtidal Rock and Rocky Reefs', 'code': '9.2', 'season': 'unknown', 'suitability': 'Suitable', 'majorimportance': 'Yes'}, {'habitat': 'Marine Neritic - Subtidal Loose Rock/pebble/gravel', 'code': '9.3', 'season': 'unknown', 'suitability': 'Suitable', 'majorimportance': 'Yes'}]	[{'code': '5.4', 'score': 'Unknown', 'severity': 'Unknown', 'timing': 'Ongoing', 'title': 'Fishing & harvesting aquatic resources', 'invasive': None, 'scope': 'Unknown'}, {'code': '5.4.1', 'score': 'Unknown', 'severity': 'Unknown', 'timing': 'Ongoing', 'title': 'Intentional use: (subsistence/small scale) [harvest]', 'invasive': None, 'scope': 'Unknown'}, {'code': '5.4.2', 'score': 'Unknown', 'sev…	<em>Chrysoblephus anglicus</em> is vulnerable to overexploitation by line-fishing due to its relatively limited distribution (Smith and Heemstra 1986), slow growth rate and late maturity (Mann <em>et al.</em> 2005). In addition, there is evidence that this species is becoming increasingly targeted in KwaZulu-Natal because of serial depletion of other preferred linefish species (B. Mann pers. comm…
170195	ACTINOPTERYGII	PERCIFORMES	SPARIDAE	Chrysoblephus	lophus	Least Concern	Marine	[{'habitat': 'Marine Neritic - Subtidal Rock and Rocky Reefs', 'code': '9.2', 'season': 'unknown', 'suitability': 'Suitable', 'majorimportance': 'Yes'}, {'habitat': 'Marine Neritic - Subtidal Loose Rock/pebble/gravel', 'code': '9.3', 'season': 'unknown', 'suitability': 'Suitable', 'majorimportance': 'Yes'}]	[]	Currently, there are no known major threats to this species; however, life-history characteristics of <em>C. lophus</em>&#160;are not well known and it is likely that this species shares characteristics of other southern African sparids that makes them vulnerable to exploitation (Maggs and Mann 2013).
170196	ACTINOPTERYGII	PERCIFORMES	SPARIDAE	Polyamblyodon	gibbosum	Least Concern	Marine	[{'habitat': 'Marine Neritic - Pelagic', 'code': '9.1', 'season': 'unknown', 'suitability': 'Suitable', 'majorimportance': 'Yes'}, {'habitat': 'Marine Neritic - Subtidal Rock and Rocky Reefs', 'code': '9.2', 'season': 'unknown', 'suitability': 'Suitable', 'majorimportance': 'Yes'}, {'habitat': 'Marine Neritic - Subtidal Loose Rock/pebble/gravel', 'code': '9.3', 'season': 'unknown', 'suitability':…	[]	<p>There are no major threats identified for <em>Polyamblyodon gibbosum.</em></p> .
170197	ACTINOPTERYGII	PERCIFORMES	SPARIDAE	Oblada	melanura	Least Concern	Marine	[{'habitat': 'Marine Coastal/supratidal - Coastal Caves/Karst', 'code': '13.2', 'season': 'unknown', 'suitability': 'Suitable', 'majorimportance': 'Yes'}, {'habitat': 'Marine Neritic - Subtidal Rock and Rocky Reefs', 'code': '9.2', 'season': 'unknown', 'suitability': 'Suitable', 'majorimportance': 'Yes'}, {'habitat': 'Marine Neritic - Subtidal Loose Rock/pebble/gravel', 'code': '9.3', 'season': '…	[{'code': '5.4', 'score': 'Unknown', 'severity': 'Unknown', 'timing': 'Ongoing', 'title': 'Fishing & harvesting aquatic resources', 'invasive': None, 'scope': 'Unknown'}, {'code': '5.4.1', 'score': 'Unknown', 'severity': 'Unknown', 'timing': 'Ongoing', 'title': 'Intentional use: (subsistence/small scale) [harvest]', 'invasive': None, 'scope': 'Unknown'}]	Localized population declines from fishing may pose a threat to this species.&#160;Natural predation may also be a factor controlling populations in the East Adriatic Sea (Pallaoro <em>et al. </em>1998) where high fishing pressure is also present. Shellfish harvesting of mussels through reduction of macroalgae habitats has also been shown to affect local populations (Guidetti <em>et al.</em> 2004)
170198	ACTINOPTERYGII	PERCIFORMES	SPARIDAE	Rhabdosargus	sarba	Least Concern	Marine	[{'habitat': 'Marine Coastal/Supratidal - Coastal Brackish/Saline Lagoons/Marine Lakes', 'code': '13.4', 'season': None, 'suitability': None, 'majorimportance': None}, {'habitat': 'Marine Neritic - Estuaries', 'code': '9.10', 'season': None, 'suitability': None, 'majorimportance': None}, {'habitat': 'Marine Neritic - Subtidal Rock and Rocky Reefs', 'code': '9.2', 'season': None, 'suitability': No…	[{'code': '5.4', 'score': 'Low Impact: 3', 'severity': None, 'timing': 'Ongoing', 'title': 'Fishing & harvesting aquatic resources', 'invasive': None, 'scope': None}, {'code': '5.4.1', 'score': 'Low Impact: 3', 'severity': None, 'timing': 'Ongoing', 'title': 'Intentional use: (subsistence/small scale) [harvest]', 'invasive': None, 'scope': None}, {'code': '5.4.2', 'score': 'Low Impact: 3', 'sever…	The main threats to populations of&#160;<em>Rhabdosargus sarba</em>&#160;include habitat destruction (especially of the estuarine habitat), pollution of shallow coastal waters and overfishing (James&#160;<em>et al.</em>&#160;2004).<strong><br/></strong><strong><br/></strong>
170199	ACTINOPTERYGII	PERCIFORMES	SPARIDAE	Acanthopagrus	sivicolus	Vulnerable	Freshwater (=Inland waters)|Marine	[{'habitat': 'Marine Neritic - Estuaries', 'code': '9.10', 'season': 'unknown', 'suitability': 'Suitable', 'majorimportance': 'Yes'}]	[{'code': '11.4', 'score': 'Unknown', 'severity': 'Unknown', 'timing': 'Future', 'title': 'Storms & flooding', 'invasive': None, 'scope': 'Unknown'}, {'code': '1.3', 'score': 'Unknown', 'severity': 'Unknown', 'timing': 'Ongoing', 'title': 'Tourism & recreation areas', 'invasive': None, 'scope': 'Unknown'}, {'code': '5.4', 'score': 'Low Impact: 3', 'severity': None, 'timing': 'Ongoing', 'title': '…	Fishing for food is a threat to&#160;<em>Acanthopagrus sivicolus</em>&#160;as evidenced by decreasing maximum sizes (Y. Iwatsuki pers. comm. 2009). This species may also be susceptible to habitat degradation due to coastal development and severe weather events as a result of climate change (Nakamura 2010).
170200	ACTINOPTERYGII	PERCIFORMES	SPARIDAE	Lithognathus	aureti	Near Threatened	Marine	[{'habitat': 'Marine Neritic - Subtidal Loose Rock/pebble/gravel', 'code': '9.3', 'season': 'unknown', 'suitability': 'Suitable', 'majorimportance': 'Yes'}, {'habitat': 'Marine Neritic - Subtidal Sandy', 'code': '9.4', 'season': 'unknown', 'suitability': 'Suitable', 'majorimportance': 'Yes'}]	[{'code': '5.4', 'score': 'Unknown', 'severity': 'Unknown', 'timing': 'Ongoing', 'title': 'Fishing & harvesting aquatic resources', 'invasive': None, 'scope': 'Unknown'}, {'code': '5.4.1', 'score': 'Unknown', 'severity': 'Unknown', 'timing': 'Ongoing', 'title': 'Intentional use: (subsistence/small scale) [harvest]', 'invasive': None, 'scope': 'Unknown'}, {'code': '5.4.2', 'score': 'Unknown', 'sev…	<em>Lithognathus aureti</em> is an important species in both commercial and recreational sectors in Namibia (Holtzhausen <em>et al.</em> 2001) and exhibits life history characteristics such as slow growth and longevity that make this species extremely susceptible to over-fishing. It also has a restricted distribution and its habitat is largely limited to the surf zone out to 10 m depth (Holtzhaus…
170201	ACTINOPTERYGII	PERCIFORMES	SPARIDAE	Pachymetopon	aeneum	Least Concern	Marine	[{'habitat': 'Marine Neritic - Subtidal Rock and Rocky Reefs', 'code': '9.2', 'season': 'unknown', 'suitability': 'Suitable', 'majorimportance': 'Yes'}, {'habitat': 'Marine Neritic - Subtidal Loose Rock/pebble/gravel', 'code': '9.3', 'season': 'unknown', 'suitability': 'Suitable', 'majorimportance': 'Yes'}]	[{'code': '5.4', 'score': 'Unknown', 'severity': 'Unknown', 'timing': 'Ongoing', 'title': 'Fishing & harvesting aquatic resources', 'invasive': None, 'scope': 'Unknown'}, {'code': '5.4.1', 'score': 'Unknown', 'severity': 'Unknown', 'timing': 'Ongoing', 'title': 'Intentional use: (subsistence/small scale) [harvest]', 'invasive': None, 'scope': 'Unknown'}, {'code': '5.4.2', 'score': 'Unknown', 'sev…	<em>Pachymetopon aeneum</em>&#160;is a component of the recreational and commercial linefishery (Smale and Buxton 1985) and exhibits life history traits such as slow growth, late maturation and protogynous hermaphroditism which could lead to over-exploitation in a size-selective fishery.
170203	ACTINOPTERYGII	PERCIFORMES	SPARIDAE	Rhabdosargus	holubi	Least Concern	Marine	[{'habitat': 'Marine Neritic - Estuaries', 'code': '9.10', 'season': 'unknown', 'suitability': 'Suitable', 'majorimportance': 'Yes'}, {'habitat': 'Marine Neritic - Subtidal Rock and Rocky Reefs', 'code': '9.2', 'season': 'unknown', 'suitability': 'Suitable', 'majorimportance': 'Yes'}, {'habitat': 'Marine Neritic - Subtidal Loose Rock/pebble/gravel', 'code': '9.3', 'season': 'unknown', 'suitabilit…	[{'code': '6.1', 'score': 'Unknown', 'severity': 'Unknown', 'timing': 'Ongoing', 'title': 'Recreational activities', 'invasive': None, 'scope': 'Unknown'}, {'code': '7.3', 'score': 'Unknown', 'severity': 'Unknown', 'timing': 'Ongoing', 'title': 'Other ecosystem modifications', 'invasive': None, 'scope': 'Unknown'}]	As&#160;<em>Rhabdosargus holubi </em>is an estuarine dependent species, the degradation of estuarine nursery areas along the entire southeastern seaboard may have resulted in an overall reduction in biomass of this species. Protection of suitable marine and estuarine habitats is therefore imperative for the future status of this species (GÃ¶tz and Cowley 2012).
170204	ACTINOPTERYGII	PERCIFORMES	SPARIDAE	Cymatoceps	nasutus	Vulnerable	Marine	[{'habitat': 'Marine Neritic - Subtidal Rock and Rocky Reefs', 'code': '9.2', 'season': 'unknown', 'suitability': 'Suitable', 'majorimportance': 'Yes'}, {'habitat': 'Marine Neritic - Subtidal Loose Rock/pebble/gravel', 'code': '9.3', 'season': 'unknown', 'suitability': 'Suitable', 'majorimportance': 'Yes'}]	[{'code': '5.4', 'score': 'Unknown', 'severity': 'Unknown', 'timing': 'Ongoing', 'title': 'Fishing & harvesting aquatic resources', 'invasive': None, 'scope': 'Unknown'}, {'code': '5.4.1', 'score': 'Unknown', 'severity': 'Unknown', 'timing': 'Ongoing', 'title': 'Intentional use: (subsistence/small scale) [harvest]', 'invasive': None, 'scope': 'Unknown'}, {'code': '5.4.2', 'score': 'Unknown', 'sev…	<em>Cymatoceps nasutus</em> is extremely vulnerable to overexploitation due to its life history characteristics, including high residency, slow growth, late maturity, longevity, and hermaphroditism (Buxton and Clarke 1989). Their aggressive nature as dominant reef predators further accentuates their vulnerability to capture. Male and female sex ratios are heavily biased towards females, which is …
170205	ACTINOPTERYGII	PERCIFORMES	SPARIDAE	Calamus	pennatula	Least Concern	Marine	[{'habitat': 'Marine Neritic - Subtidal Rock and Rocky Reefs', 'code': '9.2', 'season': 'unknown', 'suitability': 'Suitable', 'majorimportance': 'Yes'}, {'habitat': 'Marine Neritic - Subtidal Sandy', 'code': '9.4', 'season': 'unknown', 'suitability': 'Suitable', 'majorimportance': 'Yes'}]	[]	There are no major threats known for this species.
170206	ACTINOPTERYGII	PERCIFORMES	SPARIDAE	Polysteganus	undulosus	Critically Endangered	Marine	[{'habitat': 'Marine Neritic - Subtidal Rock and Rocky Reefs', 'code': '9.2', 'season': 'unknown', 'suitability': 'Suitable', 'majorimportance': 'Yes'}, {'habitat': 'Marine Neritic - Subtidal Loose Rock/pebble/gravel', 'code': '9.3', 'season': 'unknown', 'suitability': 'Suitable', 'majorimportance': 'Yes'}]	[{'code': '5.4', 'score': 'Unknown', 'severity': 'Unknown', 'timing': 'Ongoing', 'title': 'Fishing & harvesting aquatic resources', 'invasive': None, 'scope': 'Unknown'}, {'code': '5.4.1', 'score': 'Unknown', 'severity': 'Unknown', 'timing': 'Ongoing', 'title': 'Intentional use: (subsistence/small scale) [harvest]', 'invasive': None, 'scope': 'Unknown'}]	<em>Polysteganus undulosus</em> was overexploited and fished down to very low levels throughout the 20th&#160;century&#160;(Penney <em>et al.</em>&#160;1999,&#160;Griffiths 2000).&#160;During the peak spawning season (August to October),&#160;<em>P. undulosus</em>&#160;historically formed predictable spawning aggregations in areas such as the Illovo Banks south of Durban which were heavily target…
170207	ACTINOPTERYGII	PERCIFORMES	SPARIDAE	Calamus	penna	Least Concern	Marine	[{'habitat': 'Marine Neritic - Subtidal Rock and Rocky Reefs', 'code': '9.2', 'season': 'unknown', 'suitability': 'Suitable', 'majorimportance': 'Yes'}, {'habitat': 'Back Slope', 'code': '9.8.2', 'season': 'unknown', 'suitability': 'Suitable', 'majorimportance': 'Yes'}, {'habitat': 'Marine Neritic - Seagrass (Submerged)', 'code': '9.9', 'season': 'unknown', 'suitability': 'Suitable', 'majorimport…	[]	There are no major threats known for this species.
170208	ACTINOPTERYGII	PERCIFORMES	SPARIDAE	Pachymetopon	grande	Near Threatened	Marine	[{'habitat': 'Marine Neritic - Subtidal Rock and Rocky Reefs', 'code': '9.2', 'season': 'unknown', 'suitability': 'Suitable', 'majorimportance': 'Yes'}]	[{'code': '5.4', 'score': 'Unknown', 'severity': 'Unknown', 'timing': 'Ongoing', 'title': 'Fishing & harvesting aquatic resources', 'invasive': None, 'scope': 'Unknown'}, {'code': '5.4.1', 'score': 'Unknown', 'severity': 'Unknown', 'timing': 'Ongoing', 'title': 'Intentional use: (subsistence/small scale) [harvest]', 'invasive': None, 'scope': 'Unknown'}, {'code': '5.4.2', 'score': 'Unknown', 'sev…	Although <em>P. grande</em> is not exploited commercially, it is heavily targeted by the recreational shore angling fishery and spearfishery (Clarke and Buxton 1989). It is also an important component of subsistence fisheries along the Eastern Cape coast (Brouwer 1997, Mann <em>et al.</em>&#160;2003). This species has experienced population declines of almost 30% over around seven years, (Clarke …
170209	ACTINOPTERYGII	PERCIFORMES	SPARIDAE	Diplodus	fasciatus	Least Concern	Marine	[{'habitat': 'Marine Neritic - Subtidal Loose Rock/pebble/gravel', 'code': '9.3', 'season': 'unknown', 'suitability': 'Suitable', 'majorimportance': 'Yes'}, {'habitat': 'Marine Neritic - Subtidal Sandy', 'code': '9.4', 'season': 'unknown', 'suitability': 'Suitable', 'majorimportance': 'Yes'}]	[{'code': '5.4', 'score': 'Unknown', 'severity': 'Unknown', 'timing': 'Ongoing', 'title': 'Fishing & harvesting aquatic resources', 'invasive': None, 'scope': 'Unknown'}, {'code': '5.4.1', 'score': 'Unknown', 'severity': 'Unknown', 'timing': 'Ongoing', 'title': 'Intentional use: (subsistence/small scale) [harvest]', 'invasive': None, 'scope': 'Unknown'}]	There are no major threats known for this species. Potential localized declines from fishing may pose a threat to this species as it has a restricted range.
170210	ACTINOPTERYGII	PERCIFORMES	SPARIDAE	Pachymetopon	blochii	Least Concern	Marine	[{'habitat': 'Marine Neritic - Subtidal Rock and Rocky Reefs', 'code': '9.2', 'season': 'unknown', 'suitability': 'Suitable', 'majorimportance': 'Yes'}, {'habitat': 'Marine Neritic - Subtidal Loose Rock/pebble/gravel', 'code': '9.3', 'season': 'unknown', 'suitability': 'Suitable', 'majorimportance': 'Yes'}, {'habitat': 'Marine Neritic - Macroalgal/Kelp', 'code': '9.7', 'season': 'unknown', 'suita…	[{'code': '5.4', 'score': 'Unknown', 'severity': 'Unknown', 'timing': 'Ongoing', 'title': 'Fishing & harvesting aquatic resources', 'invasive': None, 'scope': 'Unknown'}, {'code': '5.4.1', 'score': 'Unknown', 'severity': 'Unknown', 'timing': 'Ongoing', 'title': 'Intentional use: (subsistence/small scale) [harvest]', 'invasive': None, 'scope': 'Unknown'}]	<em>Pachymetopon blochii</em>&#160;is&#160;an important fish to shore anglers, commercial and recreational boat fishers especially along the Western Cape coast. Although estimated to be under-exploited in 1985 (Pulfrich and Griffiths 1988c, Punt <em>et al. </em>1996) it is likely to be subject to increased fishing pressure as a consequence of the issuing of community access rights to subsistence/…
170211	ACTINOPTERYGII	PERCIFORMES	SPARIDAE	Diplodus	prayensis	Least Concern	Marine	[{'habitat': 'Marine Neritic - Subtidal Rock and Rocky Reefs', 'code': '9.2', 'season': 'unknown', 'suitability': 'Suitable', 'majorimportance': 'Yes'}, {'habitat': 'Marine Neritic - Subtidal Muddy', 'code': '9.6', 'season': 'unknown', 'suitability': 'Suitable', 'majorimportance': 'No'}]	[{'code': '5.4', 'score': 'Unknown', 'severity': 'Unknown', 'timing': 'Ongoing', 'title': 'Fishing & harvesting aquatic resources', 'invasive': None, 'scope': 'Unknown'}, {'code': '5.4.1', 'score': 'Unknown', 'severity': 'Unknown', 'timing': 'Ongoing', 'title': 'Intentional use: (subsistence/small scale) [harvest]', 'invasive': None, 'scope': 'Unknown'}]	There are no major threats known for this species but potential declines may pose a threat.
170212	ACTINOPTERYGII	PERCIFORMES	SPARIDAE	Evynnis	tumifrons	Least Concern	Marine	[{'habitat': 'Marine Neritic - Subtidal Sandy', 'code': '9.4', 'season': 'unknown', 'suitability': 'Suitable', 'majorimportance': 'Yes'}, {'habitat': 'Marine Neritic - Subtidal Sandy-Mud', 'code': '9.5', 'season': 'unknown', 'suitability': 'Suitable', 'majorimportance': 'Yes'}, {'habitat': 'Marine Neritic - Subtidal Muddy', 'code': '9.6', 'season': 'unknown', 'suitability': 'Suitable', 'majorimpo…	[{'code': '5.4', 'score': 'Unknown', 'severity': 'Unknown', 'timing': 'Ongoing', 'title': 'Fishing & harvesting aquatic resources', 'invasive': None, 'scope': 'Unknown'}, {'code': '5.4.1', 'score': 'Unknown', 'severity': 'Unknown', 'timing': 'Ongoing', 'title': 'Intentional use: (subsistence/small scale) [harvest]', 'invasive': None, 'scope': 'Unknown'}, {'code': '5.4.2', 'score': 'Unknown', 'sev…	Overfishing is a threat to <em>D. tumifrons</em>&#160;as it has been over-exploited in the South China Sea and the East China Sea in the past.
170213	ACTINOPTERYGII	PERCIFORMES	SPARIDAE	Pterogymnus	laniarius	Least Concern	Marine	[{'habitat': 'Marine Neritic - Subtidal Rock and Rocky Reefs', 'code': '9.2', 'season': 'unknown', 'suitability': 'Suitable', 'majorimportance': 'Yes'}, {'habitat': 'Marine Neritic - Subtidal Sandy', 'code': '9.4', 'season': 'unknown', 'suitability': 'Suitable', 'majorimportance': 'Yes'}, {'habitat': 'Marine Neritic - Subtidal Sandy-Mud', 'code': '9.5', 'season': 'unknown', 'suitability': 'Suitab…	[]	<em>Pterogymnus laniarius</em>&#160;is targeted in commercial, trawl and line fisheries but is not currently thought to be under an immediate threat.
170214	ACTINOPTERYGII	PERCIFORMES	SPARIDAE	Diplodus	noct	Least Concern	Marine	[{'habitat': 'Marine Neritic - Subtidal Rock and Rocky Reefs', 'code': '9.2', 'season': 'unknown', 'suitability': 'Suitable', 'majorimportance': 'Yes'}]	[{'code': '5.4', 'score': 'Unknown', 'severity': 'Unknown', 'timing': 'Ongoing', 'title': 'Fishing & harvesting aquatic resources', 'invasive': None, 'scope': 'Unknown'}, {'code': '5.4.1', 'score': 'Unknown', 'severity': 'Unknown', 'timing': 'Ongoing', 'title': 'Intentional use: (subsistence/small scale) [harvest]', 'invasive': None, 'scope': 'Unknown'}]	Overfishing may be a potential threat to this species.
170215	ACTINOPTERYGII	PERCIFORMES	SPARIDAE	Polysteganus	coeruleopunctatus	Data Deficient	Marine	[{'habitat': 'Marine Neritic - Subtidal Rock and Rocky Reefs', 'code': '9.2', 'season': 'unknown', 'suitability': 'Suitable', 'majorimportance': 'Yes'}, {'habitat': 'Marine Neritic - Subtidal Loose Rock/pebble/gravel', 'code': '9.3', 'season': 'unknown', 'suitability': 'Suitable', 'majorimportance': 'Yes'}, {'habitat': 'Marine Neritic - Subtidal Sandy', 'code': '9.4', 'season': 'unknown', 'suitab…	[{'code': '5.4', 'score': 'Unknown', 'severity': 'Unknown', 'timing': 'Ongoing', 'title': 'Fishing & harvesting aquatic resources', 'invasive': None, 'scope': 'Unknown'}, {'code': '5.4.1', 'score': 'Unknown', 'severity': 'Unknown', 'timing': 'Ongoing', 'title': 'Intentional use: (subsistence/small scale) [harvest]', 'invasive': None, 'scope': 'Unknown'}, {'code': '5.4.2', 'score': 'Unknown', 'sev…	Declines in CPUE and catch composition indicate that <em>Polysteganus coeruleopunctatus </em>may be overfished in some areas. The likelihood of overexploitation of this species is increased due to its life history characteristics including hermaphroditism and longevity&#160;(Fennessy and Mann 2013).&#160;This species may be threatened by localized overfishing in the future as targeting increases …
170216	ACTINOPTERYGII	PERCIFORMES	SPARIDAE	Crenidens	crenidens	Least Concern	Marine	[{'habitat': 'Marine Neritic - Estuaries', 'code': '9.10', 'season': 'unknown', 'suitability': 'Suitable', 'majorimportance': 'Yes'}, {'habitat': 'Marine Neritic - Subtidal Sandy', 'code': '9.4', 'season': 'unknown', 'suitability': 'Suitable', 'majorimportance': 'Yes'}, {'habitat': 'Marine Neritic - Subtidal Sandy-Mud', 'code': '9.5', 'season': 'unknown', 'suitability': 'Suitable', 'majorimportan…	[{'code': '7.3', 'score': 'Unknown', 'severity': 'Unknown', 'timing': 'Future', 'title': 'Other ecosystem modifications', 'invasive': None, 'scope': 'Unknown'}]	Current threats to&#160;<em>Crenidens crenidens </em>are unknown; however, possible threats&#160;include habitat degradation and pollution of estuarine habitats. Further research will be required to determine major threats to this species.
170217	ACTINOPTERYGII	PERCIFORMES	SPARIDAE	Acanthopagrus	longispinnis	Data Deficient	Marine	[{'habitat': 'Unknown', 'code': '18', 'season': 'unknown', 'suitability': 'Unknown', 'majorimportance': None}]	[]	There are no major threats known for this species.
170218	ACTINOPTERYGII	PERCIFORMES	SPARIDAE	Boopsoidea	inornata	Least Concern	Marine	[{'habitat': 'Marine Neritic - Subtidal Rock and Rocky Reefs', 'code': '9.2', 'season': 'unknown', 'suitability': 'Suitable', 'majorimportance': 'Yes'}, {'habitat': 'Marine Neritic - Subtidal Loose Rock/pebble/gravel', 'code': '9.3', 'season': 'unknown', 'suitability': 'Suitable', 'majorimportance': 'Yes'}, {'habitat': 'Marine Neritic - Subtidal Sandy', 'code': '9.4', 'season': 'unknown', 'suitab…	[{'code': '5.4', 'score': 'Unknown', 'severity': 'Unknown', 'timing': 'Future', 'title': 'Fishing & harvesting aquatic resources', 'invasive': None, 'scope': 'Unknown'}, {'code': '5.4.1', 'score': 'Unknown', 'severity': 'Unknown', 'timing': 'Future', 'title': 'Intentional use: (subsistence/small scale) [harvest]', 'invasive': None, 'scope': 'Unknown'}]	<em>Boopsoidea inornata</em>&#160;may become increasingly important in the South East Cape and South West Cape as other larger reef fish species are depleted; therefore, it is possible that future catches of this species will increase with increased targeting and the use of smaller hooks (Mann and Buxton pers. comm. 2009). There are no major threats known to this species at the present time.
170219	ACTINOPTERYGII	PERCIFORMES	SPARIDAE	Argyrops	megalommatus	Data Deficient	Marine	[{'habitat': 'Unknown', 'code': '18', 'season': 'unknown', 'suitability': 'Unknown', 'majorimportance': None}]	[]	There are no major threats known for this species.
170220	ACTINOPTERYGII	PERCIFORMES	SPARIDAE	Pagrus	auriga	Least Concern	Marine	[{'habitat': 'Marine Neritic - Subtidal Rock and Rocky Reefs', 'code': '9.2', 'season': 'unknown', 'suitability': 'Suitable', 'majorimportance': 'Yes'}, {'habitat': 'Marine Neritic - Subtidal Loose Rock/pebble/gravel', 'code': '9.3', 'season': 'unknown', 'suitability': 'Suitable', 'majorimportance': 'Yes'}]	[{'code': '5.4', 'score': 'Low Impact: 3', 'severity': None, 'timing': 'Ongoing', 'title': 'Fishing & harvesting aquatic resources', 'invasive': None, 'scope': None}, {'code': '5.4.1', 'score': 'Low Impact: 3', 'severity': None, 'timing': 'Ongoing', 'title': 'Intentional use: (subsistence/small scale) [harvest]', 'invasive': None, 'scope': None}, {'code': '5.4.2', 'score': 'Low Impact: 3', 'sever…	Potential localized declines from fishing may threaten this species.
170221	ACTINOPTERYGII	PERCIFORMES	SPARIDAE	Cheimerius	nufar	Data Deficient	Marine	[{'habitat': 'Marine Neritic - Subtidal Rock and Rocky Reefs', 'code': '9.2', 'season': 'unknown', 'suitability': 'Suitable', 'majorimportance': 'Yes'}, {'habitat': 'Marine Neritic - Subtidal Loose Rock/pebble/gravel', 'code': '9.3', 'season': 'unknown', 'suitability': 'Suitable', 'majorimportance': 'Yes'}, {'habitat': 'Marine Neritic - Subtidal Sandy', 'code': '9.4', 'season': 'unknown', 'suitab…	[{'code': '5.4', 'score': 'Unknown', 'severity': 'Unknown', 'timing': 'Ongoing', 'title': 'Fishing & harvesting aquatic resources', 'invasive': None, 'scope': 'Unknown'}, {'code': '5.4.1', 'score': 'Unknown', 'severity': 'Unknown', 'timing': 'Ongoing', 'title': 'Intentional use: (subsistence/small scale) [harvest]', 'invasive': None, 'scope': 'Unknown'}, {'code': '5.4.2', 'score': 'Unknown', 'sev…	The main threat to&#160;<em>Cheimerius nufar</em>&#160;is likely to be overfishing, as this species&#160;is extremely important to fisheries throughout its range. Although no formal stock assessments have been undertaken for&#160;<em>C. nufar</em>, stock status indicators such as trends in catch composition and mean size, suggest that while the stocks in South Africa appear to be stable, the stoc…
170222	ACTINOPTERYGII	PERCIFORMES	SPARIDAE	Diplodus	bellottii	Least Concern	Marine	[{'habitat': 'Marine Neritic - Estuaries', 'code': '9.10', 'season': 'unknown', 'suitability': 'Suitable', 'majorimportance': 'Yes'}, {'habitat': 'Marine Neritic - Subtidal Rock and Rocky Reefs', 'code': '9.2', 'season': 'unknown', 'suitability': 'Suitable', 'majorimportance': 'Yes'}, {'habitat': 'Marine Neritic - Subtidal Sandy', 'code': '9.4', 'season': 'unknown', 'suitability': 'Suitable', 'ma…	[{'code': '5.4', 'score': 'Unknown', 'severity': 'Unknown', 'timing': 'Ongoing', 'title': 'Fishing & harvesting aquatic resources', 'invasive': None, 'scope': 'Unknown'}, {'code': '5.4.1', 'score': 'Unknown', 'severity': 'Unknown', 'timing': 'Ongoing', 'title': 'Intentional use: (subsistence/small scale) [harvest]', 'invasive': None, 'scope': 'Unknown'}, {'code': '7.3', 'score': 'Unknown', 'sever…	There are potential localized declines from fishing and habitat modification in estuaries.&#160;<span style="font-style: italic;">Diplodus bellottii</span>&#160;recently appeared in the Tejo (Tagus) estuary and this increase in abundance there has been related to climate warming (Cabral<em> et al</em>. 2001). <em>Diplodus bellottii</em> has a high dietary and spatial overlap&#160;with <em>D. vulg…
170223	ACTINOPTERYGII	PERCIFORMES	SPARIDAE	Archosargus	probatocephalus	Least Concern	Marine	[{'habitat': 'Artificial/Marine - Marine Anthropogenic Structures', 'code': '15.11', 'season': None, 'suitability': 'Suitable', 'majorimportance': 'No'}, {'habitat': 'Marine Neritic - Estuaries', 'code': '9.10', 'season': None, 'suitability': 'Suitable', 'majorimportance': 'Yes'}, {'habitat': 'Marine Neritic - Subtidal Rock and Rocky Reefs', 'code': '9.2', 'season': None, 'suitability': 'Suitable…	[{'code': '5.4', 'score': 'Unknown', 'severity': 'Unknown', 'timing': 'Ongoing', 'title': 'Fishing & harvesting aquatic resources', 'invasive': None, 'scope': 'Unknown'}, {'code': '5.4.1', 'score': 'Unknown', 'severity': 'Unknown', 'timing': 'Ongoing', 'title': 'Intentional use: (subsistence/small scale) [harvest]', 'invasive': None, 'scope': 'Unknown'}, {'code': '5.4.2', 'score': 'Unknown', 'sev…	In the Gulf of Mexico, Sheepshead is a minor component of the shrimp trawl bycatch; this species composed less than 0.02% of the total bycatch during the 1995 spring season in Texas&#160;(Sheepshead Technical Task Force 2006). In Florida, this species is rarely caught in the shrimp trawl fishery (Coleman <em>et al.</em> 1993). Sheepshead are caught in passive fishing gears (e.g., ghost nets and c…
170224	ACTINOPTERYGII	PERCIFORMES	SPARIDAE	Pagellus	erythrinus	Least Concern	Marine	[{'habitat': 'Marine Neritic - Subtidal Rock and Rocky Reefs', 'code': '9.2', 'season': 'unknown', 'suitability': 'Suitable', 'majorimportance': 'Yes'}, {'habitat': 'Marine Neritic - Subtidal Loose Rock/pebble/gravel', 'code': '9.3', 'season': 'unknown', 'suitability': 'Suitable', 'majorimportance': 'Yes'}, {'habitat': 'Marine Neritic - Subtidal Sandy', 'code': '9.4', 'season': 'unknown', 'suitab…	[{'code': '5.4', 'score': 'Unknown', 'severity': 'Unknown', 'timing': 'Ongoing', 'title': 'Fishing & harvesting aquatic resources', 'invasive': None, 'scope': 'Unknown'}, {'code': '5.4.1', 'score': 'Unknown', 'severity': 'Unknown', 'timing': 'Ongoing', 'title': 'Intentional use: (subsistence/small scale) [harvest]', 'invasive': None, 'scope': 'Unknown'}]	Potential localized declines from fishing may threaten <em>P. erythrinus</em>.
170225	ACTINOPTERYGII	PERCIFORMES	SPARIDAE	Rhabdosargus	globiceps	Vulnerable	Marine	[{'habitat': 'Marine Neritic - Estuaries', 'code': '9.10', 'season': None, 'suitability': 'Suitable', 'majorimportance': None}, {'habitat': 'Marine Neritic - Subtidal Rock and Rocky Reefs', 'code': '9.2', 'season': None, 'suitability': 'Suitable', 'majorimportance': None}, {'habitat': 'Marine Neritic - Subtidal Loose Rock/pebble/gravel', 'code': '9.3', 'season': None, 'suitability': 'Suitable', '…	[{'code': '1.2', 'score': 'Unknown', 'severity': 'Unknown', 'timing': 'Ongoing', 'title': 'Commercial & industrial areas', 'invasive': None, 'scope': 'Unknown'}, {'code': '5.4', 'score': 'Unknown', 'severity': 'Unknown', 'timing': 'Ongoing', 'title': 'Fishing & harvesting aquatic resources', 'invasive': None, 'scope': 'Unknown'}, {'code': '5.4.1', 'score': 'Unknown', 'severity': 'Unknown', 'timin…	Based on the slow growth rate and maximum age of more than 20 years,&#160;<em>R. globiceps</em>&#160;is vulnerable to overfishing (Griffiths <em>et al</em>. 2002). In parts of its distribution <em>R. globiceps</em>&#160;is also threatened by nursery habitat destruction (e.g. by harbour development in Saldanah Bay) and pollution.
170226	ACTINOPTERYGII	PERCIFORMES	SPARIDAE	Sparodon	durbanensis	Near Threatened	Marine	[{'habitat': 'Marine Intertidal - Rocky Shoreline', 'code': '12.1', 'season': 'unknown', 'suitability': 'Suitable', 'majorimportance': 'Yes'}, {'habitat': 'Marine Intertidal - Tidepools', 'code': '12.6', 'season': 'unknown', 'suitability': 'Suitable', 'majorimportance': 'Yes'}, {'habitat': 'Marine Neritic - Subtidal Rock and Rocky Reefs', 'code': '9.2', 'season': 'unknown', 'suitability': 'Suitab…	[{'code': '5.4', 'score': 'Unknown', 'severity': 'Unknown', 'timing': 'Ongoing', 'title': 'Fishing & harvesting aquatic resources', 'invasive': None, 'scope': 'Unknown'}, {'code': '5.4.1', 'score': 'Unknown', 'severity': 'Unknown', 'timing': 'Ongoing', 'title': 'Intentional use: (subsistence/small scale) [harvest]', 'invasive': None, 'scope': 'Unknown'}, {'code': '5.4.2', 'score': 'Unknown', 'sev…	<em>Sparodon durbanensis</em>&#160;is an extremely important trophy fish for both the recreational shore fishery and spear-fishery (Clarke 1988, Mann <em>et al.</em>&#160;1997). The limited inshore distribution, large size, slow growth, late maturity and longevity exhibited by this species make it extremely susceptible to overexploitation (Booth and Attwood 2000, Potts and Mann 2012). It is estim…
170227	ACTINOPTERYGII	PERCIFORMES	SPARIDAE	Dentex	fourmanoiri	Data Deficient	Marine	[{'habitat': 'Soft Substrate', 'code': '11.1.2', 'season': 'unknown', 'suitability': 'Suitable', 'majorimportance': 'Yes'}]	[]	There are no major threats known for this species.
170228	ACTINOPTERYGII	PERCIFORMES	SPARIDAE	Acanthopagrus	omanensis	Data Deficient	Marine	[{'habitat': 'Marine Neritic - Subtidal Rock and Rocky Reefs', 'code': '9.2', 'season': 'unknown', 'suitability': 'Suitable', 'majorimportance': 'Yes'}]	[]	There are no major threats known for this species.
170229	ACTINOPTERYGII	PERCIFORMES	SPARIDAE	Pagellus	acarne	Least Concern	Marine	[{'habitat': 'Marine Neritic - Subtidal Rock and Rocky Reefs', 'code': '9.2', 'season': 'unknown', 'suitability': 'Suitable', 'majorimportance': 'No'}, {'habitat': 'Marine Neritic - Subtidal Loose Rock/pebble/gravel', 'code': '9.3', 'season': 'unknown', 'suitability': 'Suitable', 'majorimportance': 'No'}, {'habitat': 'Marine Neritic - Subtidal Sandy', 'code': '9.4', 'season': 'unknown', 'suitabil…	[{'code': '5.4', 'score': 'Unknown', 'severity': 'Unknown', 'timing': 'Ongoing', 'title': 'Fishing & harvesting aquatic resources', 'invasive': None, 'scope': 'Unknown'}, {'code': '5.4.1', 'score': 'Unknown', 'severity': 'Unknown', 'timing': 'Ongoing', 'title': 'Intentional use: (subsistence/small scale) [harvest]', 'invasive': None, 'scope': 'Unknown'}, {'code': '5.4.2', 'score': 'Unknown', 'sev…	<em>Pagellus acarne</em> is a highly-valued, heavily-exploited commercial species in many parts of its range. There are indications of population declines and concerns with current conservation measures in place. In the Canary Islands and Spain, the present legislation of a minimum size landing limit is smaller than the size that this species achieves sexual maturity; this leads to increased vuln…
170230	ACTINOPTERYGII	PERCIFORMES	SPARIDAE	Acanthopagrus	akazakii	Data Deficient	Marine	[{'habitat': 'Marine Neritic - Estuaries', 'code': '9.10', 'season': 'unknown', 'suitability': 'Suitable', 'majorimportance': 'Yes'}, {'habitat': 'Marine Neritic - Subtidal Sandy', 'code': '9.4', 'season': 'unknown', 'suitability': 'Suitable', 'majorimportance': 'Yes'}, {'habitat': 'Marine Neritic - Subtidal Sandy-Mud', 'code': '9.5', 'season': 'unknown', 'suitability': 'Suitable', 'majorimportan…	[{'code': '3.2', 'score': 'Unknown', 'severity': 'Unknown', 'timing': 'Ongoing', 'title': 'Mining & quarrying', 'invasive': None, 'scope': 'Unknown'}, {'code': '5.4', 'score': 'Unknown', 'severity': 'Unknown', 'timing': 'Ongoing', 'title': 'Fishing & harvesting aquatic resources', 'invasive': None, 'scope': 'Unknown'}, {'code': '5.4.1', 'score': 'Unknown', 'severity': 'Unknown', 'timing': 'Ongoin…	<span style="font-style: italic;">Acanthopagrus akazakii</span> is sold commercially in Noumea and harvesting of this species could pose a potential threat if it remains unchecked. There are, however, no indications at present time of population declines from resource collection.&#160;This species has a small distribution range and population size (Iwatsuki 2013). This species may also be suscept…
170231	ACTINOPTERYGII	PERCIFORMES	SPARIDAE	Argyrozona	argyrozona	Near Threatened	Marine	[{'habitat': 'Marine Neritic - Subtidal Rock and Rocky Reefs', 'code': '9.2', 'season': None, 'suitability': 'Suitable', 'majorimportance': 'Yes'}, {'habitat': 'Marine Neritic - Subtidal Loose Rock/pebble/gravel', 'code': '9.3', 'season': None, 'suitability': 'Suitable', 'majorimportance': 'Yes'}, {'habitat': 'Marine Neritic - Subtidal Sandy', 'code': '9.4', 'season': None, 'suitability': 'Suitab…	[{'code': '5.4', 'score': 'Unknown', 'severity': 'Unknown', 'timing': 'Ongoing', 'title': 'Fishing & harvesting aquatic resources', 'invasive': None, 'scope': 'Unknown'}, {'code': '5.4.1', 'score': 'Unknown', 'severity': 'Unknown', 'timing': 'Ongoing', 'title': 'Intentional use: (subsistence/small scale) [harvest]', 'invasive': None, 'scope': 'Unknown'}, {'code': '5.4.2', 'score': 'Unknown', 'sev…	CPUE on traditional fishing grounds have declined by 95% during the 20th century (Brouwer and Griffiths 2005, Griffiths 2000).&#160;Offshore operations targeting <em>A. argyrozona </em>are primarily large adults and unlikely to be sustained; this could have a substantial impact on remaining spawner biomass if these operations continue.&#160;Commercial effort reduction during the 2006 long-term ri…
170232	ACTINOPTERYGII	PERCIFORMES	SPARIDAE	Dentex	macrophthalmus	Least Concern	Marine	[{'habitat': 'Marine Neritic - Subtidal Rock and Rocky Reefs', 'code': '9.2', 'season': 'unknown', 'suitability': 'Suitable', 'majorimportance': 'Yes'}, {'habitat': 'Marine Neritic - Subtidal Loose Rock/pebble/gravel', 'code': '9.3', 'season': 'unknown', 'suitability': 'Suitable', 'majorimportance': 'No'}, {'habitat': 'Marine Neritic - Subtidal Sandy', 'code': '9.4', 'season': 'unknown', 'suitabi…	[{'code': '5.4', 'score': 'Unknown', 'severity': 'Unknown', 'timing': 'Future', 'title': 'Fishing & harvesting aquatic resources', 'invasive': None, 'scope': 'Unknown'}, {'code': '5.4.1', 'score': 'Unknown', 'severity': 'Unknown', 'timing': 'Future', 'title': 'Intentional use: (subsistence/small scale) [harvest]', 'invasive': None, 'scope': 'Unknown'}, {'code': '5.4.2', 'score': 'Unknown', 'sever…	This species is susceptible to population declines due to overfishing (Gascuel <em>et al.</em>&#160;2007).
170233	ACTINOPTERYGII	PERCIFORMES	SPARIDAE	Calamus	leucosteus	Least Concern	Marine	[{'habitat': 'Marine Neritic - Subtidal Rock and Rocky Reefs', 'code': '9.2', 'season': 'unknown', 'suitability': 'Suitable', 'majorimportance': 'Yes'}, {'habitat': 'Marine Neritic - Subtidal Sandy', 'code': '9.4', 'season': 'unknown', 'suitability': 'Suitable', 'majorimportance': 'Yes'}]	[{'code': '5.4', 'score': 'Unknown', 'severity': 'Unknown', 'timing': 'Future', 'title': 'Fishing & harvesting aquatic resources', 'invasive': None, 'scope': 'Unknown'}, {'code': '5.4.1', 'score': 'Unknown', 'severity': 'Unknown', 'timing': 'Future', 'title': 'Intentional use: (subsistence/small scale) [harvest]', 'invasive': None, 'scope': 'Unknown'}]	There are no major threats known for this species at present time. However, there is potential for localized declines from fishing.
170234	ACTINOPTERYGII	PERCIFORMES	SPARIDAE	Pagellus	affinis	Least Concern	Marine	[{'habitat': 'Marine Neritic - Subtidal Sandy', 'code': '9.4', 'season': 'unknown', 'suitability': 'Suitable', 'majorimportance': 'Yes'}, {'habitat': 'Marine Neritic - Subtidal Sandy-Mud', 'code': '9.5', 'season': 'unknown', 'suitability': 'Suitable', 'majorimportance': 'Yes'}, {'habitat': 'Marine Neritic - Subtidal Muddy', 'code': '9.6', 'season': 'unknown', 'suitability': 'Suitable', 'majorimpo…	[{'code': '5.4', 'score': 'Unknown', 'severity': 'Unknown', 'timing': 'Ongoing', 'title': 'Fishing & harvesting aquatic resources', 'invasive': None, 'scope': 'Unknown'}, {'code': '5.4.2', 'score': 'Unknown', 'severity': 'Unknown', 'timing': 'Ongoing', 'title': 'Intentional use: (large scale) [harvest]', 'invasive': None, 'scope': 'Unknown'}]	Of the <em>P. affinis</em>&#160;sampled in a survey off Oman. approximately 33% female and 41% male were immature, raising concerns about sustainability of the fishery (McIlwain<em> et al </em>2006). However, recent data indicate that the current fishing mortality should be sustained but that an increase in fishing effort could lead to overfishing (Al-Kiyumi 2013).
170235	ACTINOPTERYGII	PERCIFORMES	SPARIDAE	Acanthopagrus	taiwanensis	Data Deficient	Marine	[{'habitat': 'Marine Neritic - Estuaries', 'code': '9.10', 'season': 'unknown', 'suitability': 'Suitable', 'majorimportance': 'Yes'}, {'habitat': 'Marine Neritic - Subtidal Sandy-Mud', 'code': '9.5', 'season': 'unknown', 'suitability': 'Suitable', 'majorimportance': 'Yes'}, {'habitat': 'Marine Neritic - Subtidal Muddy', 'code': '9.6', 'season': 'unknown', 'suitability': 'Suitable', 'majorimportan…	[{'code': '5.4', 'score': 'Unknown', 'severity': 'Unknown', 'timing': 'Ongoing', 'title': 'Fishing & harvesting aquatic resources', 'invasive': None, 'scope': 'Unknown'}, {'code': '5.4.1', 'score': 'Unknown', 'severity': 'Unknown', 'timing': 'Ongoing', 'title': 'Intentional use: (subsistence/small scale) [harvest]', 'invasive': None, 'scope': 'Unknown'}, {'code': '7.3', 'score': 'Unknown', 'sever…	In the past decade, natural populations of <em>Acanthopagrus</em> (comprising <em>A. berda </em>and <em>A. taiwanensis</em>) in Dapeng Bay have gradually declined because of overexploitation and environmental degradation (Tseng <em>et al. </em>2009). Habitat degradation and fishing in estuarine habitats can possibly be considered a major threat to this species.
170236	ACTINOPTERYGII	PERCIFORMES	SPARIDAE	Sparidentex	belayewi	Data Deficient	Marine	[{'habitat': 'Unknown', 'code': '18', 'season': 'unknown', 'suitability': 'Unknown', 'majorimportance': None}]	[]	There are no major threats known for this species.
170238	ACTINOPTERYGII	PERCIFORMES	SPARIDAE	Argyrops	spinifer	Least Concern	Marine	[{'habitat': 'Marine Neritic - Subtidal Rock and Rocky Reefs', 'code': '9.2', 'season': None, 'suitability': None, 'majorimportance': None}, {'habitat': 'Marine Neritic - Subtidal Loose Rock/pebble/gravel', 'code': '9.3', 'season': None, 'suitability': None, 'majorimportance': None}, {'habitat': 'Marine Neritic - Subtidal Sandy', 'code': '9.4', 'season': None, 'suitability': None, 'majorimportanc…	[{'code': '5.4', 'score': 'Unknown', 'severity': 'Unknown', 'timing': 'Ongoing', 'title': 'Fishing & harvesting aquatic resources', 'invasive': None, 'scope': 'Unknown'}, {'code': '5.4.1', 'score': 'Unknown', 'severity': 'Unknown', 'timing': 'Ongoing', 'title': 'Intentional use: (subsistence/small scale) [harvest]', 'invasive': None, 'scope': 'Unknown'}, {'code': '5.4.2', 'score': 'Unknown', 'sev…	The development of the fishing fleet of the United Arab Emirates in the southern Persian Gulf has raised concerns relating to the resource management implications.&#160;The exploitation rate for this species (0.407 per year) was comparable to that at the estimated safe harvest level (0.401 per year<sup></sup>), i.e. F<sub>0.1</sub>, suggesting that&#160;<em>Argyrops spinifer</em>&#160;is exploite…
170239	ACTINOPTERYGII	PERCIFORMES	SPARIDAE	Acanthopagrus	bifasciatus	Least Concern	Marine	[{'habitat': 'Marine Intertidal - Mangrove Submerged Roots', 'code': '12.7', 'season': 'unknown', 'suitability': 'Suitable', 'majorimportance': 'Yes'}, {'habitat': 'Marine Neritic - Subtidal Rock and Rocky Reefs', 'code': '9.2', 'season': 'unknown', 'suitability': 'Suitable', 'majorimportance': 'Yes'}, {'habitat': 'Marine Neritic - Subtidal Loose Rock/pebble/gravel', 'code': '9.3', 'season': 'unk…	[{'code': '1.2', 'score': 'Unknown', 'severity': 'Unknown', 'timing': 'Ongoing', 'title': 'Commercial & industrial areas', 'invasive': None, 'scope': 'Unknown'}, {'code': '5.4', 'score': 'Unknown', 'severity': 'Unknown', 'timing': 'Ongoing', 'title': 'Fishing & harvesting aquatic resources', 'invasive': None, 'scope': 'Unknown'}, {'code': '5.4.1', 'score': 'Unknown', 'severity': 'Unknown', 'timin…	The fishing mortality in the southern Persian Gulf is well within the estimated safe harvest level (F<sub>0.1</sub>), however, the development of the fishing fleet of the United Arab Emirates in the southern Persian Gulf has raised concerns relating to the resource management implications (Grandcourt&#160;<em>et al.</em>&#160;2004).&#160;Spawning aggregations off the coast of Oman are actively ta…
170240	ACTINOPTERYGII	PERCIFORMES	SPARIDAE	Dentex	hypselosomus	Least Concern	Marine	[{'habitat': 'Marine Neritic - Subtidal Rock and Rocky Reefs', 'code': '9.2', 'season': 'unknown', 'suitability': 'Suitable', 'majorimportance': 'Yes'}]	[{'code': '5.4', 'score': 'Unknown', 'severity': 'Unknown', 'timing': 'Ongoing', 'title': 'Fishing & harvesting aquatic resources', 'invasive': None, 'scope': 'Unknown'}, {'code': '5.4.1', 'score': 'Unknown', 'severity': 'Unknown', 'timing': 'Ongoing', 'title': 'Intentional use: (subsistence/small scale) [harvest]', 'invasive': None, 'scope': 'Unknown'}, {'code': '5.4.2', 'score': 'Unknown', 'sev…	<em>Dentex hypselosomus</em> is harvested by Japanese, Korean and Chinese fishermen; therefore, overfishing of this species is a potential threat.
170241	ACTINOPTERYGII	PERCIFORMES	SPARIDAE	Pagrus	africanus	Least Concern	Marine	[{'habitat': 'Marine Neritic - Subtidal Rock and Rocky Reefs', 'code': '9.2', 'season': 'unknown', 'suitability': 'Suitable', 'majorimportance': 'Yes'}, {'habitat': 'Marine Neritic - Subtidal Loose Rock/pebble/gravel', 'code': '9.3', 'season': 'unknown', 'suitability': 'Suitable', 'majorimportance': 'Yes'}, {'habitat': 'Marine Neritic - Subtidal Sandy', 'code': '9.4', 'season': 'unknown', 'suitab…	[{'code': '5.4', 'score': 'Unknown', 'severity': 'Unknown', 'timing': 'Ongoing', 'title': 'Fishing & harvesting aquatic resources', 'invasive': None, 'scope': 'Unknown'}, {'code': '5.4.1', 'score': 'Unknown', 'severity': 'Unknown', 'timing': 'Ongoing', 'title': 'Intentional use: (subsistence/small scale) [harvest]', 'invasive': None, 'scope': 'Unknown'}]	Currently, there are no major threats to <em>Pagrus africanus</em>; however, potential threats include localized declines from fishing.
170242	ACTINOPTERYGII	PERCIFORMES	SPARIDAE	Pagellus	natalensis	Least Concern	Marine	[{'habitat': 'Marine Neritic - Subtidal Loose Rock/pebble/gravel', 'code': '9.3', 'season': 'unknown', 'suitability': 'Suitable', 'majorimportance': 'Yes'}, {'habitat': 'Marine Neritic - Subtidal Sandy', 'code': '9.4', 'season': 'unknown', 'suitability': 'Suitable', 'majorimportance': 'Yes'}, {'habitat': 'Marine Neritic - Subtidal Sandy-Mud', 'code': '9.5', 'season': 'unknown', 'suitability': 'Su…	[]	There are no major threats known for <em>P. natalensis</em>. Current exploitation levels are low as market potential is primarily for larger fish (&gt; 25 cm TL); however, this species may become increasingly important in the future as it appears to be abundant over soft substrata and is not reef dependent (Fennessy and Mann 2000).
170243	ACTINOPTERYGII	PERCIFORMES	SPARIDAE	Calamus	arctifrons	Least Concern	Marine	[{'habitat': 'Marine Neritic - Subtidal Rock and Rocky Reefs', 'code': '9.2', 'season': 'unknown', 'suitability': 'Suitable', 'majorimportance': 'Yes'}, {'habitat': 'Marine Neritic - Seagrass (Submerged)', 'code': '9.9', 'season': 'unknown', 'suitability': 'Suitable', 'majorimportance': 'Yes'}]	[{'code': '1.1', 'score': 'Unknown', 'severity': 'Unknown', 'timing': 'Ongoing', 'title': 'Housing & urban areas', 'invasive': None, 'scope': 'Unknown'}, {'code': '1.3', 'score': 'Unknown', 'severity': 'Unknown', 'timing': 'Ongoing', 'title': 'Tourism & recreation areas', 'invasive': None, 'scope': 'Unknown'}, {'code': '5.4', 'score': 'Unknown', 'severity': 'Unknown', 'timing': 'Ongoing', 'title'…	<em>Calamus arctifrons&#160;</em>has potential localized declines from habitat degradation of seagrass beds and is vulnerable to the toxic effects of red tides (Springer and Woodburn 1960). This species is commonly taken as by-catch in shrimp trawl fisheries (E.S. Dalton, NMFS Galveston Laboratory pers. comm. 2011).
170244	ACTINOPTERYGII	PERCIFORMES	SPARIDAE	Pagellus	bogaraveo	Near Threatened	Marine	[{'habitat': 'Marine Neritic - Subtidal Rock and Rocky Reefs', 'code': '9.2', 'season': 'unknown', 'suitability': 'Suitable', 'majorimportance': 'No'}, {'habitat': 'Marine Neritic - Subtidal Loose Rock/pebble/gravel', 'code': '9.3', 'season': 'unknown', 'suitability': 'Suitable', 'majorimportance': 'No'}, {'habitat': 'Marine Neritic - Subtidal Sandy', 'code': '9.4', 'season': 'unknown', 'suitabil…	[{'code': '11.1', 'score': 'Unknown', 'severity': 'Unknown', 'timing': 'Ongoing', 'title': 'Habitat shifting & alteration', 'invasive': None, 'scope': 'Unknown'}, {'code': '5.4', 'score': 'Unknown', 'severity': 'Unknown', 'timing': 'Ongoing', 'title': 'Fishing & harvesting aquatic resources', 'invasive': None, 'scope': 'Unknown'}, {'code': '5.4.1', 'score': 'Unknown', 'severity': 'Unknown', 'timi…	Due to its particular biology, the Blackspot Sea Bream may be especially sensitive to overfishing and declines from fishing are the main threat to this species. There is historical evidence of overexploitation and population collapse in at least one major fishery, in the Bay of Biscay (Lorance 2011). This species is heavily exploited and is closely associated with atmospheric oscillations and thu…
170245	ACTINOPTERYGII	PERCIFORMES	SPARIDAE	Dentex	dentex	Vulnerable	Marine	[{'habitat': 'Marine Neritic - Subtidal Rock and Rocky Reefs', 'code': '9.2', 'season': 'unknown', 'suitability': 'Suitable', 'majorimportance': 'Yes'}, {'habitat': 'Marine Neritic - Subtidal Loose Rock/pebble/gravel', 'code': '9.3', 'season': 'unknown', 'suitability': 'Suitable', 'majorimportance': 'No'}, {'habitat': 'Marine Neritic - Subtidal Sandy', 'code': '9.4', 'season': 'unknown', 'suitabi…	[{'code': '5.4', 'score': 'Unknown', 'severity': 'Unknown', 'timing': 'Ongoing', 'title': 'Fishing & harvesting aquatic resources', 'invasive': None, 'scope': 'Unknown'}, {'code': '5.4.1', 'score': 'Unknown', 'severity': 'Unknown', 'timing': 'Ongoing', 'title': 'Intentional use: (subsistence/small scale) [harvest]', 'invasive': None, 'scope': 'Unknown'}, {'code': '5.4.2', 'score': 'Unknown', 'sev…	This species is an important food fish and overexploitation and eutrophication are considered threats in parts of its range. <em>Dentex dentex</em>&#160;is highly vulnerable to fishing due to its life history characteristics including its longevity, large size and slow growth (Garcias-Rubies and Zabala 1990, Garcia-Rubies <em>et al.</em>&#160;2013). There has been an increase in demand for this s…
170246	ACTINOPTERYGII	PERCIFORMES	SPARIDAE	Virididentex	acromegalus	Least Concern	Marine	[{'habitat': 'Marine Neritic - Subtidal Rock and Rocky Reefs', 'code': '9.2', 'season': 'unknown', 'suitability': 'Suitable', 'majorimportance': 'Yes'}]	[]	There are no major threats known for this species.
170247	ACTINOPTERYGII	PERCIFORMES	SPARIDAE	Petrus	rupestris	Endangered	Marine	[{'habitat': 'Marine Neritic - Subtidal Rock and Rocky Reefs', 'code': '9.2', 'season': 'resident', 'suitability': 'Suitable', 'majorimportance': 'Yes'}]	[{'code': '5.4', 'score': 'Unknown', 'severity': 'Unknown', 'timing': 'Ongoing', 'title': 'Fishing & harvesting aquatic resources', 'invasive': None, 'scope': 'Unknown'}, {'code': '5.4.1', 'score': 'Unknown', 'severity': 'Unknown', 'timing': 'Ongoing', 'title': 'Intentional use: (subsistence/small scale) [harvest]', 'invasive': None, 'scope': 'Unknown'}, {'code': '5.4.2', 'score': 'Unknown', 'sev…	<em>Petrus rupestris</em> is a long lived and slowing growing species that migrates&#160;northwards to the Eastern Cape where they aggregate to spawn and were historically targeted by recreational and commercial line fishermen (Mann and Kerwath 2013).&#160;This species exhibits life history attributes that make it extremely vulnerable to overexploitation and make the recovery of the stock more ch…
170248	ACTINOPTERYGII	PERCIFORMES	SPARIDAE	Polyamblyodon	germanum	Least Concern	Marine	[{'habitat': 'Marine Neritic - Subtidal Rock and Rocky Reefs', 'code': '9.2', 'season': 'unknown', 'suitability': 'Suitable', 'majorimportance': 'Yes'}, {'habitat': 'Marine Neritic - Subtidal Loose Rock/pebble/gravel', 'code': '9.3', 'season': 'unknown', 'suitability': 'Suitable', 'majorimportance': 'Yes'}]	[]	<p>There are no major threats that have been identified for&#160;<em>Polyamblyodon germanum.</em></p>
170249	ACTINOPTERYGII	PERCIFORMES	SPARIDAE	Calamus	calamus	Least Concern	Marine	[{'habitat': 'Marine Neritic - Subtidal Rock and Rocky Reefs', 'code': '9.2', 'season': 'unknown', 'suitability': 'Suitable', 'majorimportance': 'Yes'}, {'habitat': 'Marine Neritic - Subtidal Sandy', 'code': '9.4', 'season': 'unknown', 'suitability': 'Suitable', 'majorimportance': 'Yes'}, {'habitat': 'Outer Reef Channel', 'code': '9.8.1', 'season': 'unknown', 'suitability': 'Suitable', 'majorimpo…	[{'code': '1.1', 'score': 'Unknown', 'severity': 'Unknown', 'timing': 'Ongoing', 'title': 'Housing & urban areas', 'invasive': None, 'scope': 'Unknown'}, {'code': '1.3', 'score': 'Unknown', 'severity': 'Unknown', 'timing': 'Ongoing', 'title': 'Tourism & recreation areas', 'invasive': None, 'scope': 'Unknown'}, {'code': '5.4', 'score': 'Unknown', 'severity': 'Unknown', 'timing': 'Ongoing', 'title'…	<em>Calamus calamus</em>&#160;may be negatively impacted by habitat degradation in parts of its distribution and some localized declines from directed fishing.
170250	ACTINOPTERYGII	PERCIFORMES	SPARIDAE	Lagodon	rhomboides	Least Concern	Freshwater (=Inland waters)|Marine	[{'habitat': 'Marine Intertidal - Mangrove Submerged Roots', 'code': '12.7', 'season': 'unknown', 'suitability': 'Suitable', 'majorimportance': 'Yes'}, {'habitat': 'Artificial/Marine - Marine Anthropogenic Structures', 'code': '15.11', 'season': 'unknown', 'suitability': 'Suitable', 'majorimportance': 'No'}, {'habitat': 'Marine Neritic - Estuaries', 'code': '9.10', 'season': 'unknown', 'suitabili…	[{'code': '1.1', 'score': 'Unknown', 'severity': 'Unknown', 'timing': 'Ongoing', 'title': 'Housing & urban areas', 'invasive': None, 'scope': 'Unknown'}, {'code': '1.2', 'score': 'Unknown', 'severity': 'Unknown', 'timing': 'Ongoing', 'title': 'Commercial & industrial areas', 'invasive': None, 'scope': 'Unknown'}, {'code': '1.3', 'score': 'Unknown', 'severity': 'Unknown', 'timing': 'Ongoing', 'tit…	The Pinfish may be negatively impacted as bycatch in shrimp trawl fisheries and gillnet fisheries (Crawford <em>et al.</em> 2011, Mathers<em> et al.</em> 2013). Habitat degradation may be impacting parts of this species' range.
170251	ACTINOPTERYGII	PERCIFORMES	SPARIDAE	Boops	boops	Least Concern	Marine	[{'habitat': 'Marine Coastal/Supratidal - Coastal Brackish/Saline Lagoons/Marine Lakes', 'code': '13.4', 'season': 'unknown', 'suitability': 'Suitable', 'majorimportance': 'No'}, {'habitat': 'Marine Neritic - Subtidal Rock and Rocky Reefs', 'code': '9.2', 'season': 'unknown', 'suitability': 'Suitable', 'majorimportance': 'No'}, {'habitat': 'Marine Neritic - Subtidal Loose Rock/pebble/gravel', 'co…	[{'code': '5.4', 'score': 'Unknown', 'severity': 'Unknown', 'timing': 'Ongoing', 'title': 'Fishing & harvesting aquatic resources', 'invasive': None, 'scope': 'Unknown'}, {'code': '5.4.1', 'score': 'Unknown', 'severity': 'Unknown', 'timing': 'Ongoing', 'title': 'Intentional use: (subsistence/small scale) [harvest]', 'invasive': None, 'scope': 'Unknown'}, {'code': '5.4.2', 'score': 'Unknown', 'sev…	There are no major threats known for <em>Boops boops</em>. There may be localized declines from fishing.
170252	ACTINOPTERYGII	PERCIFORMES	SPARIDAE	Argyrops	filamentosus	Least Concern	Marine	[{'habitat': 'Marine Neritic - Subtidal Rock and Rocky Reefs', 'code': '9.2', 'season': 'unknown', 'suitability': 'Suitable', 'majorimportance': 'Yes'}, {'habitat': 'Marine Neritic - Subtidal Loose Rock/pebble/gravel', 'code': '9.3', 'season': 'unknown', 'suitability': 'Suitable', 'majorimportance': 'Yes'}, {'habitat': 'Marine Neritic - Subtidal Sandy', 'code': '9.4', 'season': 'unknown', 'suitab…	[{'code': '5.4', 'score': 'Unknown', 'severity': 'Unknown', 'timing': 'Ongoing', 'title': 'Fishing & harvesting aquatic resources', 'invasive': None, 'scope': 'Unknown'}, {'code': '5.4.1', 'score': 'Unknown', 'severity': 'Unknown', 'timing': 'Ongoing', 'title': 'Intentional use: (subsistence/small scale) [harvest]', 'invasive': None, 'scope': 'Unknown'}, {'code': '5.4.2', 'score': 'Unknown', 'sev…	<em>Argyrops filamentosus</em>&#160;is a keystone species that has experienced significant decline in RÃ©union&#160;and is extremely sensitive to human activities. The threats to this species in&#160;RÃ©union include targeting by commercial fisheries, habitat loss and eutrophication/pollution (Fricke <em>et al. </em>2009). It is likely that similar threats may impact this species in other parts o…
170253	ACTINOPTERYGII	PERCIFORMES	SPARIDAE	Sparus	aurata	Least Concern	Marine	[{'habitat': 'Marine Coastal/Supratidal - Coastal Brackish/Saline Lagoons/Marine Lakes', 'code': '13.4', 'season': 'unknown', 'suitability': 'Suitable', 'majorimportance': 'Yes'}, {'habitat': 'Marine Neritic - Estuaries', 'code': '9.10', 'season': 'unknown', 'suitability': 'Suitable', 'majorimportance': 'Yes'}, {'habitat': 'Marine Neritic - Subtidal Rock and Rocky Reefs', 'code': '9.2', 'season':…	[{'code': '2.4', 'score': 'Unknown', 'severity': 'Unknown', 'timing': 'Ongoing', 'title': 'Marine & freshwater aquaculture', 'invasive': None, 'scope': 'Unknown'}, {'code': '2.4.3', 'score': 'Unknown', 'severity': 'Unknown', 'timing': 'Ongoing', 'title': 'Scale Unknown/Unrecorded', 'invasive': None, 'scope': 'Unknown'}, {'code': '5.4', 'score': 'Unknown', 'severity': 'Unknown', 'timing': 'Ongoing…	One of the major threats to this species is localized declines from fishing. This is a very important commercial species, and it is also one of the most important fishes used for aquaculture in the Mediterranean Sea. There may also be a problem here with genetic pollution of the wild stocks through interbreeding with the numerous artificially bred and selected aquaculture escapee fish, as appears…
170254	ACTINOPTERYGII	PERCIFORMES	SPARIDAE	Diplodus	bermudensis	Least Concern	Marine	[{'habitat': 'Marine Neritic - Subtidal Loose Rock/pebble/gravel', 'code': '9.3', 'season': 'unknown', 'suitability': 'Suitable', 'majorimportance': 'Yes'}, {'habitat': 'Marine Neritic - Subtidal Sandy', 'code': '9.4', 'season': 'unknown', 'suitability': 'Suitable', 'majorimportance': 'Yes'}, {'habitat': 'Marine Neritic - Subtidal Sandy-Mud', 'code': '9.5', 'season': 'unknown', 'suitability': 'Su…	[]	There are no major threats known for this species.
170255	ACTINOPTERYGII	PERCIFORMES	SPARIDAE	Lithognathus	olivieri	Data Deficient	Marine	[{'habitat': 'Unknown', 'code': '18', 'season': 'unknown', 'suitability': 'Unknown', 'majorimportance': None}]	[{'code': '5.4', 'score': 'Unknown', 'severity': 'Unknown', 'timing': 'Ongoing', 'title': 'Fishing & harvesting aquatic resources', 'invasive': None, 'scope': 'Unknown'}, {'code': '5.4.1', 'score': 'Unknown', 'severity': 'Unknown', 'timing': 'Ongoing', 'title': 'Intentional use: (subsistence/small scale) [harvest]', 'invasive': None, 'scope': 'Unknown'}]	Declines from fishing pose a threat to this species and the lack of life history and population information for <em>L. oliveri</em>&#160;will make fisheries management challenging.
170256	ACTINOPTERYGII	PERCIFORMES	SPARIDAE	Chrysoblephus	gibbiceps	Endangered	Marine	[{'habitat': 'Marine Neritic - Subtidal Rock and Rocky Reefs', 'code': '9.2', 'season': 'unknown', 'suitability': 'Suitable', 'majorimportance': 'Yes'}, {'habitat': 'Marine Neritic - Subtidal Loose Rock/pebble/gravel', 'code': '9.3', 'season': 'unknown', 'suitability': 'Suitable', 'majorimportance': 'Yes'}, {'habitat': 'Marine Neritic - Macroalgal/Kelp', 'code': '9.7', 'season': 'unknown', 'suita…	[{'code': '11.1', 'score': 'Unknown', 'severity': 'Unknown', 'timing': 'Ongoing', 'title': 'Habitat shifting & alteration', 'invasive': None, 'scope': 'Unknown'}, {'code': '1.3', 'score': 'Unknown', 'severity': 'Unknown', 'timing': 'Ongoing', 'title': 'Tourism & recreation areas', 'invasive': None, 'scope': 'Unknown'}, {'code': '5.4', 'score': 'Unknown', 'severity': 'Unknown', 'timing': 'Ongoing'…	<em>Chrysoblephus gibbiceps </em>is commercially and recreationally targeted and is reported as overexploited (Griffiths 2000). Intrinsic factors that make <em>C. gibbiceps</em> vulnerable to overexploitation include slow growth rate, high residency, shoaling behaviour and longevity. Major threats to <em>C. gibbiceps&#160;</em>include localized overexploitation by recreational and commercial line…
170257	ACTINOPTERYGII	PERCIFORMES	SPARIDAE	Acanthopagrus	australis	Least Concern	Marine	[{'habitat': 'Marine Intertidal - Mangrove Submerged Roots', 'code': '12.7', 'season': 'resident', 'suitability': 'Suitable', 'majorimportance': 'Yes'}, {'habitat': 'Marine Neritic - Estuaries', 'code': '9.10', 'season': 'resident', 'suitability': 'Suitable', 'majorimportance': 'Yes'}, {'habitat': 'Marine Neritic - Subtidal Rock and Rocky Reefs', 'code': '9.2', 'season': 'resident', 'suitability'…	[{'code': '11.1', 'score': 'Unknown', 'severity': 'Unknown', 'timing': 'Ongoing', 'title': 'Habitat shifting & alteration', 'invasive': None, 'scope': 'Unknown'}, {'code': '11.4', 'score': 'Unknown', 'severity': 'Unknown', 'timing': 'Ongoing', 'title': 'Storms & flooding', 'invasive': None, 'scope': 'Unknown'}, {'code': '6.1', 'score': 'Unknown', 'severity': 'Unknown', 'timing': 'Ongoing', 'title…	There are no major threats to this species. Although threats to the species might be thought to include long term and continuous intensive fishing pressures, it seems to be remarkably resilient to such fishing activity, as average catches and fish sizes do not appear to have been greatly affected by this level of fishing over a very long period of time (at least since the 1950s). This resilience …
170258	ACTINOPTERYGII	PERCIFORMES	SPARIDAE	Spondyliosoma	cantharus	Least Concern	Marine	[{'habitat': 'Marine Neritic - Subtidal Rock and Rocky Reefs', 'code': '9.2', 'season': 'unknown', 'suitability': 'Suitable', 'majorimportance': 'Yes'}, {'habitat': 'Marine Neritic - Subtidal Loose Rock/pebble/gravel', 'code': '9.3', 'season': 'unknown', 'suitability': 'Suitable', 'majorimportance': 'Yes'}, {'habitat': 'Marine Neritic - Subtidal Sandy', 'code': '9.4', 'season': 'unknown', 'suitab…	[{'code': '1.2', 'score': 'Unknown', 'severity': 'Unknown', 'timing': 'Ongoing', 'title': 'Commercial & industrial areas', 'invasive': None, 'scope': 'Unknown'}, {'code': '5.4', 'score': 'Unknown', 'severity': 'Unknown', 'timing': 'Ongoing', 'title': 'Fishing & harvesting aquatic resources', 'invasive': None, 'scope': 'Unknown'}, {'code': '5.4.1', 'score': 'Unknown', 'severity': 'Unknown', 'timin…	<em>Spondyliosoma cantharus </em>is an important commercially harvested fish, and thus faces threats from fisheries. The value of the exploitation rate &gt;0.50 suggests that&#160;<em>S. cantharus</em>&#160;populations off the Canary Islands are heavily exploited. The value of the length at first capture (16.8 cm) is less than that of the length at first maturity and over 45% of the total catch i…
170259	ACTINOPTERYGII	PERCIFORMES	SPARIDAE	Chrysoblephus	puniceus	Least Concern	Marine	[{'habitat': 'Marine Neritic - Subtidal Rock and Rocky Reefs', 'code': '9.2', 'season': 'unknown', 'suitability': 'Suitable', 'majorimportance': 'Yes'}, {'habitat': 'Marine Neritic - Subtidal Loose Rock/pebble/gravel', 'code': '9.3', 'season': 'unknown', 'suitability': 'Suitable', 'majorimportance': 'Yes'}]	[{'code': '5.4', 'score': 'Unknown', 'severity': 'Unknown', 'timing': 'Ongoing', 'title': 'Fishing & harvesting aquatic resources', 'invasive': None, 'scope': 'Unknown'}, {'code': '5.4.1', 'score': 'Unknown', 'severity': 'Unknown', 'timing': 'Ongoing', 'title': 'Intentional use: (subsistence/small scale) [harvest]', 'invasive': None, 'scope': 'Unknown'}, {'code': '5.4.2', 'score': 'Unknown', 'sev…	<em>Chrysoblephus puniceus&#160;</em>is vulnerable to overexploitation by linefishing due to their limited distribution, resident behaviour as adults and hermaphroditism (Garratt 1993). This species is extremely important to both the commercial and recreational ski-boat fishery in KwaZulu-Natal and southern Mozambique where they comprise a large percentage of the catch (Garratt 1985a, Lichucha 20…
170260	ACTINOPTERYGII	PERCIFORMES	SPARIDAE	Diplodus	annularis	Least Concern	Marine	[{'habitat': 'Marine Neritic - Subtidal Rock and Rocky Reefs', 'code': '9.2', 'season': 'unknown', 'suitability': 'Suitable', 'majorimportance': 'Yes'}, {'habitat': 'Marine Neritic - Subtidal Loose Rock/pebble/gravel', 'code': '9.3', 'season': 'unknown', 'suitability': 'Suitable', 'majorimportance': 'No'}, {'habitat': 'Marine Neritic - Subtidal Sandy', 'code': '9.4', 'season': 'unknown', 'suitabi…	[]	This species is caught commercially in the Mediterranean, and generally artisanally elsewhere. There are no major threats to this species.
170261	ACTINOPTERYGII	PERCIFORMES	SPARIDAE	Diplodus	vulgaris	Least Concern	Marine	[{'habitat': 'Marine Neritic - Estuaries', 'code': '9.10', 'season': None, 'suitability': None, 'majorimportance': None}, {'habitat': 'Marine Neritic - Subtidal Rock and Rocky Reefs', 'code': '9.2', 'season': None, 'suitability': 'Suitable', 'majorimportance': None}, {'habitat': 'Marine Neritic - Subtidal Loose Rock/pebble/gravel', 'code': '9.3', 'season': None, 'suitability': 'Suitable', 'majori…	[{'code': '5.4', 'score': 'Unknown', 'severity': 'Unknown', 'timing': 'Ongoing', 'title': 'Fishing & harvesting aquatic resources', 'invasive': None, 'scope': 'Unknown'}, {'code': '5.4.1', 'score': 'Unknown', 'severity': 'Unknown', 'timing': 'Ongoing', 'title': 'Intentional use: (subsistence/small scale) [harvest]', 'invasive': None, 'scope': 'Unknown'}, {'code': '5.4.2', 'score': 'Unknown', 'sev…	Potential localized declines from fishing and habitat modification pose a threat to <em>D. vulgaris</em>.
170262	ACTINOPTERYGII	PERCIFORMES	SPARIDAE	Diplodus	puntazzo	Least Concern	Marine	[{'habitat': 'Marine Intertidal - Tidepools', 'code': '12.6', 'season': 'non-breeding', 'suitability': 'Suitable', 'majorimportance': 'No'}, {'habitat': 'Marine Coastal/Supratidal - Coastal Brackish/Saline Lagoons/Marine Lakes', 'code': '13.4', 'season': 'resident', 'suitability': 'Suitable', 'majorimportance': 'No'}, {'habitat': 'Marine Neritic - Estuaries', 'code': '9.10', 'season': 'resident',…	[{'code': '5.4', 'score': 'Unknown', 'severity': 'Unknown', 'timing': 'Ongoing', 'title': 'Fishing & harvesting aquatic resources', 'invasive': None, 'scope': 'Unknown'}, {'code': '5.4.1', 'score': 'Unknown', 'severity': 'Unknown', 'timing': 'Ongoing', 'title': 'Intentional use: (subsistence/small scale) [harvest]', 'invasive': None, 'scope': 'Unknown'}, {'code': '5.4.2', 'score': 'Unknown', 'sev…	Potential localized declines from fishing and habitat modification to estuaries may pose a threat to this species.
170263	ACTINOPTERYGII	PERCIFORMES	SPARIDAE	Acanthopagrus	latus	Data Deficient	Freshwater (=Inland waters)|Marine	[{'habitat': 'Artificial/Marine - Mariculture Cages', 'code': '15.12', 'season': 'unknown', 'suitability': 'Suitable', 'majorimportance': 'Yes'}, {'habitat': 'Artificial/Marine - Mari/Brackishculture Ponds', 'code': '15.13', 'season': 'unknown', 'suitability': 'Suitable', 'majorimportance': 'Yes'}, {'habitat': 'Marine Neritic - Estuaries', 'code': '9.10', 'season': 'unknown', 'suitability': 'Suit…	[{'code': '5.4', 'score': 'Unknown', 'severity': 'Unknown', 'timing': 'Ongoing', 'title': 'Fishing & harvesting aquatic resources', 'invasive': None, 'scope': 'Unknown'}, {'code': '5.4.1', 'score': 'Unknown', 'severity': 'Unknown', 'timing': 'Ongoing', 'title': 'Intentional use: (subsistence/small scale) [harvest]', 'invasive': None, 'scope': 'Unknown'}, {'code': '5.4.2', 'score': 'Unknown', 'sev…	Over the past 20 years, resources of<em> A. latus </em>in China have declined rapidly as a result of overfishing (Xia <em>et al. </em>2008).
170264	ACTINOPTERYGII	PERCIFORMES	SPARIDAE	Diplodus	holbrookii	Least Concern	Marine	[{'habitat': 'Artificial/Marine - Marine Anthropogenic Structures', 'code': '15.11', 'season': 'unknown', 'suitability': 'Suitable', 'majorimportance': 'Yes'}, {'habitat': 'Marine Neritic - Estuaries', 'code': '9.10', 'season': 'unknown', 'suitability': 'Suitable', 'majorimportance': 'Yes'}, {'habitat': 'Marine Neritic - Subtidal Rock and Rocky Reefs', 'code': '9.2', 'season': 'unknown', 'suitabi…	[{'code': '1.2', 'score': 'Unknown', 'severity': 'Unknown', 'timing': 'Ongoing', 'title': 'Commercial & industrial areas', 'invasive': None, 'scope': 'Unknown'}, {'code': '1.3', 'score': 'Unknown', 'severity': 'Unknown', 'timing': 'Ongoing', 'title': 'Tourism & recreation areas', 'invasive': None, 'scope': 'Unknown'}, {'code': '7.3', 'score': 'Unknown', 'severity': 'Unknown', 'timing': 'Ongoing',…	There are no major threats known for this species. However, habitat degradation may be impacting parts of this species' range.<strong></strong>
170265	ACTINOPTERYGII	PERCIFORMES	SPARIDAE	Polysteganus	baissaci	Least Concern	Marine	[{'habitat': 'Marine Neritic - Subtidal Rock and Rocky Reefs', 'code': '9.2', 'season': 'unknown', 'suitability': 'Suitable', 'majorimportance': 'Yes'}, {'habitat': 'Marine Neritic - Subtidal Loose Rock/pebble/gravel', 'code': '9.3', 'season': 'unknown', 'suitability': 'Suitable', 'majorimportance': 'Yes'}, {'habitat': 'Marine Neritic - Subtidal Sandy', 'code': '9.4', 'season': 'unknown', 'suitab…	[]	There are no major threats known for this species.
170272	ACTINOPTERYGII	PERCIFORMES	SPARIDAE	Diplodus	hottentotus	Least Concern	Marine	[{'habitat': 'Marine Intertidal - Tidepools', 'code': '12.6', 'season': 'unknown', 'suitability': 'Suitable', 'majorimportance': 'Yes'}, {'habitat': 'Marine Neritic - Subtidal Rock and Rocky Reefs', 'code': '9.2', 'season': 'unknown', 'suitability': 'Suitable', 'majorimportance': 'Yes'}, {'habitat': 'Marine Neritic - Subtidal Loose Rock/pebble/gravel', 'code': '9.3', 'season': 'unknown', 'suitabi…	[]	Currently, no major threats to <em>D. hottentotus</em>&#160;have been identified; however, this species exhibits slow growth, late maturation, longevity, and high residency, which make it more vulnerable to overexploitation (Mann and Dunlop 2012).&#160;Ongoing catch and effort monitoring and completion of a stock assessment are recommended.
170273	ACTINOPTERYGII	PERCIFORMES	SPARIDAE	Diplodus	omanensis	Least Concern	Marine	[{'habitat': 'Marine Neritic - Subtidal Rock and Rocky Reefs', 'code': '9.2', 'season': 'unknown', 'suitability': 'Suitable', 'majorimportance': 'Yes'}]	[]	There are no major threats known for <em>D. omanensis</em>.
170280	ACTINOPTERYGII	PERCIFORMES	CENTRACANTHIDAE	Spicara	maena	Least Concern	Marine	[{'habitat': 'Marine Neritic - Subtidal Rock and Rocky Reefs', 'code': '9.2', 'season': 'unknown', 'suitability': 'Suitable', 'majorimportance': 'Yes'}, {'habitat': 'Marine Neritic - Subtidal Loose Rock/pebble/gravel', 'code': '9.3', 'season': 'unknown', 'suitability': 'Suitable', 'majorimportance': 'Yes'}, {'habitat': 'Marine Neritic - Subtidal Sandy', 'code': '9.4', 'season': 'unknown', 'suitab…	[{'code': '5.4', 'score': 'Unknown', 'severity': 'Unknown', 'timing': 'Ongoing', 'title': 'Fishing & harvesting aquatic resources', 'invasive': None, 'scope': 'Unknown'}, {'code': '5.4.1', 'score': 'Unknown', 'severity': 'Unknown', 'timing': 'Ongoing', 'title': 'Intentional use: (subsistence/small scale) [harvest]', 'invasive': None, 'scope': 'Unknown'}]	There are no major threats known for this species. FAO catch data specifically for this species indicate a steady increase in landing over the last 20 years.<br/><br/>However, overall picarel landings ("Picarel nei") from FAO data that includes three species including potentially <span style="font-style: italic;">Spicara maena/Spicara flexuosa </span>do indicate an overall decline in landings ove…
170281	ACTINOPTERYGII	PERCIFORMES	CENTRACANTHIDAE	Spicara	nigricauda	Least Concern	Marine	[{'habitat': 'Unknown', 'code': '18', 'season': 'unknown', 'suitability': 'Unknown', 'majorimportance': None}]	[]	There are no major threats known for this species.
170282	ACTINOPTERYGII	PERCIFORMES	CENTRACANTHIDAE	Spicara	australis	Least Concern	Marine	[{'habitat': 'Marine Deep Benthic - Seamount', 'code': '11.5', 'season': 'unknown', 'suitability': 'Suitable', 'majorimportance': 'Yes'}, {'habitat': 'Marine Neritic - Subtidal Rock and Rocky Reefs', 'code': '9.2', 'season': 'unknown', 'suitability': 'Suitable', 'majorimportance': 'Yes'}, {'habitat': 'Marine Neritic - Subtidal Loose Rock/pebble/gravel', 'code': '9.3', 'season': 'unknown', 'suitab…	[]	There are no major threats known for <em>Spicara australis.</em>
170283	ACTINOPTERYGII	PERCIFORMES	CENTRACANTHIDAE	Spicara	smaris	Least Concern	Marine	[{'habitat': 'Marine Neritic - Subtidal Sandy', 'code': '9.4', 'season': 'unknown', 'suitability': 'Suitable', 'majorimportance': 'Yes'}, {'habitat': 'Marine Neritic - Subtidal Sandy-Mud', 'code': '9.5', 'season': 'unknown', 'suitability': 'Suitable', 'majorimportance': 'Yes'}, {'habitat': 'Marine Neritic - Subtidal Muddy', 'code': '9.6', 'season': 'unknown', 'suitability': 'Suitable', 'majorimpo…	[{'code': '5.4', 'score': 'Unknown', 'severity': 'Unknown', 'timing': 'Ongoing', 'title': 'Fishing & harvesting aquatic resources', 'invasive': None, 'scope': 'Unknown'}, {'code': '5.4.1', 'score': 'Unknown', 'severity': 'Unknown', 'timing': 'Ongoing', 'title': 'Intentional use: (subsistence/small scale) [harvest]', 'invasive': None, 'scope': 'Unknown'}, {'code': '8.1', 'score': 'Low Impact: 3', …	There are no major threats known for this species. However, the ICES Working Group on Introduction and Transfers of Marine Organisms (ICES 2012) based upon Kalogirous (2011) indicates that the invasive fish <em>Fistularia commersonii</em> was found to prey on <em>S. smaris </em>in the eastern Mediterranean, which may constitute an upcoming threat since <em>F. commersonnii</em> is expanding its ra…
170284	ACTINOPTERYGII	PERCIFORMES	CENTRACANTHIDAE	Centracanthus	cirrus	Least Concern	Marine	[{'habitat': 'Marine Neritic - Subtidal Rock and Rocky Reefs', 'code': '9.2', 'season': 'unknown', 'suitability': 'Suitable', 'majorimportance': 'Yes'}, {'habitat': 'Marine Neritic - Subtidal Loose Rock/pebble/gravel', 'code': '9.3', 'season': 'unknown', 'suitability': 'Suitable', 'majorimportance': 'Yes'}, {'habitat': 'Marine Neritic - Subtidal Sandy', 'code': '9.4', 'season': 'unknown', 'suitab…	[]	There are no major threats known for this species.
170285	ACTINOPTERYGII	PERCIFORMES	CENTRACANTHIDAE	Spicara	alta	Least Concern	Marine	[{'habitat': 'Marine Neritic - Subtidal Sandy', 'code': '9.4', 'season': 'unknown', 'suitability': 'Suitable', 'majorimportance': 'Yes'}, {'habitat': 'Marine Neritic - Subtidal Sandy-Mud', 'code': '9.5', 'season': 'unknown', 'suitability': 'Suitable', 'majorimportance': 'Yes'}, {'habitat': 'Marine Neritic - Subtidal Muddy', 'code': '9.6', 'season': 'unknown', 'suitability': 'Suitable', 'majorimpo…	[{'code': '5.4', 'score': 'Unknown', 'severity': 'Unknown', 'timing': 'Future', 'title': 'Fishing & harvesting aquatic resources', 'invasive': None, 'scope': 'Unknown'}, {'code': '5.4.1', 'score': 'Unknown', 'severity': 'Unknown', 'timing': 'Future', 'title': 'Intentional use: (subsistence/small scale) [harvest]', 'invasive': None, 'scope': 'Unknown'}, {'code': '5.4.2', 'score': 'Unknown', 'sever…	There is potential for declines from fishing, but currently there are no major threats known for <em>Spicara alta</em>.
170286	ACTINOPTERYGII	PERCIFORMES	CENTRACANTHIDAE	Spicara	melanurus	Least Concern	Marine	[{'habitat': 'Unknown', 'code': '18', 'season': 'unknown', 'suitability': 'Unknown', 'majorimportance': None}]	[{'code': '5.4', 'score': 'Unknown', 'severity': 'Unknown', 'timing': 'Ongoing', 'title': 'Fishing & harvesting aquatic resources', 'invasive': None, 'scope': 'Unknown'}, {'code': '5.4.1', 'score': 'Unknown', 'severity': 'Unknown', 'timing': 'Ongoing', 'title': 'Intentional use: (subsistence/small scale) [harvest]', 'invasive': None, 'scope': 'Unknown'}]	There are no major threats known for this species. Potential declines from fishing may pose a threat to this species, as it is gaining importance in fisheries due to population declines of more valuable species.
170287	ACTINOPTERYGII	PERCIFORMES	CENTRACANTHIDAE	Spicara	martinicus	Data Deficient	Marine	[{'habitat': 'Unknown', 'code': '18', 'season': 'unknown', 'suitability': 'Unknown', 'majorimportance': None}]	[]	There are no major threats known for this species.
172359	ACTINOPTERYGII	PERCIFORMES	AMBASSIDAE	Ambassis	nalua	Least Concern	Freshwater (=Inland waters)|Marine	[{'habitat': 'Marine Intertidal - Mangrove Submerged Roots', 'code': '12.7', 'season': None, 'suitability': 'Suitable', 'majorimportance': None}, {'habitat': 'Marine Coastal/Supratidal - Coastal Brackish/Saline Lagoons/Marine Lakes', 'code': '13.4', 'season': None, 'suitability': 'Suitable', 'majorimportance': 'Yes'}, {'habitat': 'Wetlands (inland) - Permanent Rivers/Streams/Creeks (includes wate…	[]	Threats to this species are poorly known, but currently there are believed to be no major threats to the global population.
172393	ACTINOPTERYGII	PERCIFORMES	AMBASSIDAE	Ambassis	interrupta	Least Concern	Freshwater (=Inland waters)|Marine	[{'habitat': 'Marine Intertidal - Mangrove Submerged Roots', 'code': '12.7', 'season': None, 'suitability': 'Suitable', 'majorimportance': None}, {'habitat': 'Marine Coastal/Supratidal - Coastal Brackish/Saline Lagoons/Marine Lakes', 'code': '13.4', 'season': None, 'suitability': 'Suitable', 'majorimportance': 'Yes'}, {'habitat': 'Wetlands (inland) - Permanent Rivers/Streams/Creeks (includes wate…	[]	There no known major threats to this widespread species.
172404	ACTINOPTERYGII	PERCIFORMES	HAEMULIDAE	Pomadasys	argenteus	Least Concern	Freshwater (=Inland waters)|Marine	[{'habitat': 'Marine Intertidal - Mangrove Submerged Roots', 'code': '12.7', 'season': None, 'suitability': 'Suitable', 'majorimportance': 'Yes'}, {'habitat': 'Wetlands (inland) - Permanent Rivers/Streams/Creeks (includes waterfalls)', 'code': '5.1', 'season': None, 'suitability': 'Suitable', 'majorimportance': 'Yes'}, {'habitat': 'Marine Neritic - Estuaries', 'code': '9.10', 'season': None, 'sui…	[]	There are no known major threats to the species. It is caught as subsistence food in parts of its range, and localized effects to its population may be experienced. However, at this time, this is not believed to be a major threat to the species.
172413	ACTINOPTERYGII	PERCIFORMES	GOBIIDAE	Awaous	grammepomus	Least Concern	Freshwater (=Inland waters)|Marine	[{'habitat': 'Marine Coastal/Supratidal - Coastal Brackish/Saline Lagoons/Marine Lakes', 'code': '13.4', 'season': None, 'suitability': 'Suitable', 'majorimportance': 'Yes'}, {'habitat': 'Wetlands (inland) - Permanent Rivers/Streams/Creeks (includes waterfalls)', 'code': '5.1', 'season': None, 'suitability': 'Suitable', 'majorimportance': 'Yes'}]	[]	There appears to be no major threats to the species although further research is needed.
172416	ACTINOPTERYGII	TETRAODONTIFORMES	TETRAODONTIDAE	Chelonodon	patoca	Least Concern	Freshwater (=Inland waters)|Marine	[{'habitat': 'Marine Intertidal - Mud Flats and Salt Flats', 'code': '12.4', 'season': None, 'suitability': 'Suitable', 'majorimportance': None}, {'habitat': 'Marine Intertidal - Tidepools', 'code': '12.6', 'season': None, 'suitability': 'Suitable', 'majorimportance': None}, {'habitat': 'Wetlands (inland) - Permanent Rivers/Streams/Creeks (includes waterfalls)', 'code': '5.1', 'season': None, 'su…	[{'code': '1.1', 'score': 'Unknown', 'severity': 'Unknown', 'timing': 'Ongoing', 'title': 'Housing & urban areas', 'invasive': None, 'scope': 'Unknown'}, {'code': '11.1', 'score': 'Unknown', 'severity': 'Unknown', 'timing': 'Ongoing', 'title': 'Habitat shifting & alteration', 'invasive': None, 'scope': 'Unknown'}, {'code': '11.3', 'score': 'Unknown', 'severity': 'Unknown', 'timing': 'Ongoing', 't…	<p>There have been no confirmed population declines in <em>C. patoca</em>. However, because of its affinity with mangroves and seagrass beds, we infer that <span style="font-style: italic;">C. patoca</span> may be experiencing population declines due to habitat loss in parts of its range.</p><p> </p><p>Globally, 16% of mangrove species are at elevated risk of extinction. Particular areas of geogr…
172432	ACTINOPTERYGII	PERCIFORMES	CHANNIDAE	Channa	micropeltes	Least Concern	Freshwater (=Inland waters)	[{'habitat': 'Artificial/Aquatic - Canals and Drainage Channels, Ditches', 'code': '15.9', 'season': None, 'suitability': 'Unknown', 'majorimportance': None}, {'habitat': 'Wetlands (inland) - Permanent Rivers/Streams/Creeks (includes waterfalls)', 'code': '5.1', 'season': None, 'suitability': 'Suitable', 'majorimportance': 'Yes'}, {'habitat': 'Wetlands (inland) - Bogs, Marshes, Swamps, Fens, Peat…	[]	Not considered to be threatened across its range, but likely to be impacted locally by habitat loss.
172447	ACTINOPTERYGII	PERCIFORMES	BLENNIIDAE	Entomacrodus	vermiculatus	Least Concern	Marine	[{'habitat': 'Marine Intertidal - Rocky Shoreline', 'code': '12.1', 'season': 'resident', 'suitability': 'Suitable', 'majorimportance': None}, {'habitat': 'Marine Intertidal - Tidepools', 'code': '12.6', 'season': 'resident', 'suitability': 'Suitable', 'majorimportance': None}, {'habitat': 'Marine Neritic - Subtidal Rock and Rocky Reefs', 'code': '9.2', 'season': 'resident', 'suitability': 'Suita…	[]	There are no major threats known for this species.
172450	ACTINOPTERYGII	PERCIFORMES	ELEOTRIDAE	Bunaka	gyrinoides	Least Concern	Freshwater (=Inland waters)|Marine	[{'habitat': 'Marine Intertidal - Rocky Shoreline', 'code': '12.1', 'season': None, 'suitability': 'Suitable', 'majorimportance': 'Yes'}, {'habitat': 'Marine Intertidal - Mangrove Submerged Roots', 'code': '12.7', 'season': None, 'suitability': 'Suitable', 'majorimportance': 'Yes'}, {'habitat': 'Marine Coastal/Supratidal - Coastal Freshwater Lakes', 'code': '13.5', 'season': None, 'suitability': …	[]	There is no information on threats<span style="font-style: italic;"> </span>to this species. Any threats to small coastal rivers and estuaries could potentially affect the species.
172495	ACTINOPTERYGII	PERCIFORMES	LUTJANIDAE	Lutjanus	johnii	Least Concern	Marine	[{'habitat': 'Marine Intertidal - Mangrove Submerged Roots', 'code': '12.7', 'season': 'resident', 'suitability': 'Unknown', 'majorimportance': None}, {'habitat': 'Marine Neritic - Estuaries', 'code': '9.10', 'season': None, 'suitability': 'Suitable', 'majorimportance': None}, {'habitat': 'Marine Neritic - Subtidal Sandy', 'code': '9.4', 'season': None, 'suitability': 'Suitable', 'majorimportance…	[{'code': '2.4', 'score': 'Low Impact: 3', 'severity': None, 'timing': 'Ongoing', 'title': 'Marine & freshwater aquaculture', 'invasive': None, 'scope': None}, {'code': '2.4.2', 'score': 'Low Impact: 3', 'severity': None, 'timing': 'Ongoing', 'title': 'Industrial aquaculture', 'invasive': None, 'scope': None}, {'code': '5.4', 'score': 'Low Impact: 3', 'severity': None, 'timing': 'Ongoing', 'title…	This species is caught mainly with handlines, bottom longlines, traps, and bottom trawls. In Hong Kong, this species is found in live fish markets (Lee and Sadovy 1998).This species is utilized for commercial aquaculture&#160;in Pakistan, Singapore, Malaysia, Thailand and the Philippines (Hussain and Khatoon 2000).<br/><strong><br/></strong>
172497	ACTINOPTERYGII	BELONIFORMES	HEMIRAMPHIDAE	Zenarchopterus	dispar	Least Concern	Freshwater (=Inland waters)|Marine	[{'habitat': 'Marine Coastal/Supratidal - Coastal Freshwater Lakes', 'code': '13.5', 'season': None, 'suitability': 'Suitable', 'majorimportance': 'Yes'}, {'habitat': 'Wetlands (inland) - Permanent Rivers/Streams/Creeks (includes waterfalls)', 'code': '5.1', 'season': None, 'suitability': 'Suitable', 'majorimportance': None}, {'habitat': 'Marine Neritic - Estuaries', 'code': '9.10', 'season': Non…	[]	There are currently no major threats known to this species. A number of potential threats from countries that this species is recorded from include land reclamation, siltation, pollution (pesticide and organic), invasive weeds and fishing.
174509	ACTINOPTERYGII	CYPRINIFORMES	CYPRINIDAE	Hypsibarbus	oatesii	Data Deficient	Freshwater (=Inland waters)	[{'habitat': 'Wetlands (inland) - Permanent Rivers/Streams/Creeks (includes waterfalls)', 'code': '5.1', 'season': None, 'suitability': 'Suitable', 'majorimportance': 'Yes'}]	[{'code': '7.2', 'score': 'Unknown', 'severity': 'Unknown', 'timing': 'Future', 'title': 'Dams & water management/use', 'invasive': None, 'scope': 'Unknown'}, {'code': '7.2.10', 'score': 'Unknown', 'severity': 'Unknown', 'timing': 'Future', 'title': 'Large dams', 'invasive': None, 'scope': 'Unknown'}]	The threats to this species are unknown, since there is little information on the biology of this species and therefore the impact of potential threats (especially those of an anthropogenic nature) remains unknown. In the Shan Plateau there are dams planned in the Salween system which may impact the species.
177949	ACTINOPTERYGII	PERCIFORMES	ACANTHURIDAE	Ctenochaetus	strigosus	Least Concern	Marine	[{'habitat': 'Marine Neritic - Subtidal Rock and Rocky Reefs', 'code': '9.2', 'season': None, 'suitability': 'Suitable', 'majorimportance': None}, {'habitat': 'Marine Neritic - Subtidal Loose Rock/pebble/gravel', 'code': '9.3', 'season': None, 'suitability': 'Suitable', 'majorimportance': None}, {'habitat': 'Outer Reef Channel', 'code': '9.8.1', 'season': None, 'suitability': 'Suitable', 'majorim…	[]	<span style="font-style: italic;">Ctenochaetus strigosus</span> is a very popular aquarium fish. In West Hawaii, it is the second most collected aquarium fish. There is no evidence of declines from harvesting.<br/><br/>Surgeonfishes show varying degrees of habitat preference and utilization of coral reef habitats, with some species spending the majority of their life stages on coral reef while ot…
177950	ACTINOPTERYGII	PERCIFORMES	ACANTHURIDAE	Naso	lituratus	Least Concern	Marine	[{'habitat': 'Marine Neritic - Subtidal Rock and Rocky Reefs', 'code': '9.2', 'season': None, 'suitability': 'Suitable', 'majorimportance': None}, {'habitat': 'Outer Reef Channel', 'code': '9.8.1', 'season': None, 'suitability': 'Suitable', 'majorimportance': None}, {'habitat': 'Back Slope', 'code': '9.8.2', 'season': None, 'suitability': 'Suitable', 'majorimportance': None}, {'habitat': 'Foreslo…	[{'code': '5.4', 'score': 'Unknown', 'severity': 'Unknown', 'timing': 'Ongoing', 'title': 'Fishing & harvesting aquatic resources', 'invasive': None, 'scope': 'Unknown'}, {'code': '5.4.1', 'score': 'Unknown', 'severity': 'Unknown', 'timing': 'Ongoing', 'title': 'Intentional use: (subsistence/small scale) [harvest]', 'invasive': None, 'scope': 'Unknown'}, {'code': '9.1', 'score': 'Unknown', 'sever…	There were differences of an order of magnitude in mean biomass between fished and protected areas in the Philippines (Stockwell <span style="font-style: italic;">et al. </span>2009). <span style="font-style: italic;">Naso lituratus</span> is heavily targeted in areas where fishery management is close to non-existent and coral reef areas are impacted by anthropogenic threats.<br/><br/>Surgeonfish…
177951	ACTINOPTERYGII	PERCIFORMES	ACANTHURIDAE	Naso	tonganus	Least Concern	Marine	[{'habitat': 'Outer Reef Channel', 'code': '9.8.1', 'season': None, 'suitability': 'Suitable', 'majorimportance': None}, {'habitat': 'Back Slope', 'code': '9.8.2', 'season': None, 'suitability': 'Suitable', 'majorimportance': None}, {'habitat': 'Foreslope (Outer Reef Slope)', 'code': '9.8.3', 'season': None, 'suitability': 'Suitable', 'majorimportance': None}, {'habitat': 'Inter-Reef Rubble Subst…	[]	There are no major threats known for this species.<br/><br/>Surgeonfishes show varying degrees of habitat preference and utilization of coral reef habitats, with some species spending the majority of their life stages on coral reef while others primarily utilize seagrass beds, mangroves, algal beds, and /or rocky reefs. The majority of surgeonfishes are exclusively found on coral reef habitat, an…
177952	ACTINOPTERYGII	PERCIFORMES	ACANTHURIDAE	Prionurus	scalprum	Data Deficient	Marine	[{'habitat': 'Marine Neritic - Subtidal Rock and Rocky Reefs', 'code': '9.2', 'season': None, 'suitability': 'Suitable', 'majorimportance': None}]	[]	There are no major threats known for this species.<br/><br/>Surgeonfishes show varying degrees of habitat preference and utilization of coral reef habitats, with some species spending the majority of their life stages on coral reef while others primarily utilize seagrass beds, mangroves, algal beds, and /or rocky reefs. The majority of surgeonfishes are exclusively found on coral reef habitat, an…
177953	ACTINOPTERYGII	PERCIFORMES	ACANTHURIDAE	Acanthurus	coeruleus	Least Concern	Marine	[{'habitat': 'Marine Neritic - Subtidal Rock and Rocky Reefs', 'code': '9.2', 'season': None, 'suitability': 'Suitable', 'majorimportance': None}, {'habitat': 'Outer Reef Channel', 'code': '9.8.1', 'season': None, 'suitability': 'Suitable', 'majorimportance': None}, {'habitat': 'Back Slope', 'code': '9.8.2', 'season': None, 'suitability': 'Suitable', 'majorimportance': None}, {'habitat': 'Foreslo…	[{'code': '5.4', 'score': 'Unknown', 'severity': 'Unknown', 'timing': 'Ongoing', 'title': 'Fishing & harvesting aquatic resources', 'invasive': None, 'scope': 'Unknown'}, {'code': '5.4.1', 'score': 'Unknown', 'severity': 'Unknown', 'timing': 'Ongoing', 'title': 'Intentional use: (subsistence/small scale) [harvest]', 'invasive': None, 'scope': 'Unknown'}]	<span style="font-style: italic;">Acanthurus coeruleus </span>is a targeted food fish in parts of its range. It is heavily fished in some areas (Haiti and Jamaica).<br/><br/>Surgeonfishes show varying degrees of habitat preference and utilization of coral reef habitats, with some species spending the majority of their life stages on coral reef while others primarily utilize seagrass beds, mangrov…
177954	ACTINOPTERYGII	PERCIFORMES	ACANTHURIDAE	Naso	reticulatus	Data Deficient	Marine	[{'habitat': 'Marine Neritic - Subtidal Rock and Rocky Reefs', 'code': '9.2', 'season': None, 'suitability': 'Suitable', 'majorimportance': None}, {'habitat': 'Foreslope (Outer Reef Slope)', 'code': '9.8.3', 'season': None, 'suitability': 'Suitable', 'majorimportance': None}]	[]	There are no major threats known for this species.<br/><br/>Surgeonfishes show varying degrees of habitat preference and utilization of coral reef habitats, with some species spending the majority of their life stages on coral reef while others primarily utilize seagrass beds, mangroves, algal beds, and /or rocky reefs. The majority of surgeonfishes are exclusively found on coral reef habitat, an…
177955	ACTINOPTERYGII	PERCIFORMES	ACANTHURIDAE	Ctenochaetus	binotatus	Least Concern	Marine	[{'habitat': 'Marine Neritic - Subtidal Rock and Rocky Reefs', 'code': '9.2', 'season': None, 'suitability': 'Suitable', 'majorimportance': None}, {'habitat': 'Outer Reef Channel', 'code': '9.8.1', 'season': None, 'suitability': 'Suitable', 'majorimportance': None}, {'habitat': 'Back Slope', 'code': '9.8.2', 'season': None, 'suitability': 'Suitable', 'majorimportance': None}, {'habitat': 'Foreslo…	[]	There are no major threats known for this species.<br/><br/>Surgeonfishes show varying degrees of habitat preference and utilization of coral reef habitats, with some species spending the majority of their life stages on coral reef while others primarily utilize seagrass beds, mangroves, algal beds, and /or rocky reefs. The majority of surgeonfishes are exclusively found on coral reef habitat, an…
177956	ACTINOPTERYGII	PERCIFORMES	ACANTHURIDAE	Prionurus	chrysurus	Data Deficient	Marine	[{'habitat': 'Marine Neritic - Subtidal Rock and Rocky Reefs', 'code': '9.2', 'season': None, 'suitability': 'Suitable', 'majorimportance': None}, {'habitat': 'Foreslope (Outer Reef Slope)', 'code': '9.8.3', 'season': None, 'suitability': 'Suitable', 'majorimportance': None}]	[]	There are no major threats known for this species.<br/><br/>Surgeonfishes show varying degrees of habitat preference and utilization of coral reef habitats, with some species spending the majority of their life stages on coral reef while others primarily utilize seagrass beds, mangroves, algal beds, and /or rocky reefs. The majority of surgeonfishes are exclusively found on coral reef habitat, an…
177957	ACTINOPTERYGII	PERCIFORMES	ACANTHURIDAE	Acanthurus	maculiceps	Least Concern	Marine	[{'habitat': 'Marine Neritic - Subtidal Sandy-Mud', 'code': '9.5', 'season': None, 'suitability': 'Suitable', 'majorimportance': None}, {'habitat': 'Back Slope', 'code': '9.8.2', 'season': None, 'suitability': 'Suitable', 'majorimportance': None}, {'habitat': 'Lagoon', 'code': '9.8.4', 'season': None, 'suitability': 'Suitable', 'majorimportance': None}]	[]	There are no major threats known for this species.<br/><br/>Surgeonfishes show varying degrees of habitat preference and utilization of coral reef habitats, with some species spending the majority of their life stages on coral reef while others primarily utilize seagrass beds, mangroves, algal beds, and /or rocky reefs. The majority of surgeonfishes are exclusively found on coral reef habitat, an…
177958	ACTINOPTERYGII	PERCIFORMES	ACANTHURIDAE	Ctenochaetus	cyanocheilus	Least Concern	Marine	[{'habitat': 'Marine Neritic - Subtidal Rock and Rocky Reefs', 'code': '9.2', 'season': None, 'suitability': 'Suitable', 'majorimportance': None}, {'habitat': 'Outer Reef Channel', 'code': '9.8.1', 'season': None, 'suitability': 'Suitable', 'majorimportance': None}, {'habitat': 'Foreslope (Outer Reef Slope)', 'code': '9.8.3', 'season': None, 'suitability': 'Suitable', 'majorimportance': None}]	[]	There are no major threats known for this species.<br/><br/>Surgeonfishes show varying degrees of habitat preference and utilization of coral reef habitats, with some species spending the majority of their life stages on coral reef while others primarily utilize seagrass beds, mangroves, algal beds, and /or rocky reefs. The majority of surgeonfishes are exclusively found on coral reef habitat, an…
177959	ACTINOPTERYGII	PERCIFORMES	ACANTHURIDAE	Acanthurus	fowleri	Least Concern	Marine	[{'habitat': 'Outer Reef Channel', 'code': '9.8.1', 'season': None, 'suitability': 'Suitable', 'majorimportance': None}, {'habitat': 'Foreslope (Outer Reef Slope)', 'code': '9.8.3', 'season': None, 'suitability': 'Suitable', 'majorimportance': None}]	[{'code': '5.4', 'score': 'Unknown', 'severity': 'Unknown', 'timing': 'Ongoing', 'title': 'Fishing & harvesting aquatic resources', 'invasive': None, 'scope': 'Unknown'}, {'code': '5.4.1', 'score': 'Unknown', 'severity': 'Unknown', 'timing': 'Ongoing', 'title': 'Intentional use: (subsistence/small scale) [harvest]', 'invasive': None, 'scope': 'Unknown'}]	<span style="font-style: italic;">Acanthurus fowleri</span> is a targeted food fish in parts of its range. It is found in areas where illegal fishing practices are known to occur. <br/><br/>Surgeonfishes show varying degrees of habitat preference and utilization of coral reef habitats, with some species spending the majority of their life stages on coral reef while others primarily utilize seagra…
177960	ACTINOPTERYGII	PERCIFORMES	ACANTHURIDAE	Acanthurus	achilles	Least Concern	Marine	[{'habitat': 'Marine Neritic - Subtidal Rock and Rocky Reefs', 'code': '9.2', 'season': None, 'suitability': 'Suitable', 'majorimportance': None}, {'habitat': 'Outer Reef Channel', 'code': '9.8.1', 'season': None, 'suitability': 'Suitable', 'majorimportance': None}, {'habitat': 'Foreslope (Outer Reef Slope)', 'code': '9.8.3', 'season': None, 'suitability': 'Suitable', 'majorimportance': None}, {'…	[{'code': '5.4', 'score': 'Unknown', 'severity': 'Unknown', 'timing': 'Ongoing', 'title': 'Fishing & harvesting aquatic resources', 'invasive': None, 'scope': 'Unknown'}, {'code': '5.4.1', 'score': 'Unknown', 'severity': 'Unknown', 'timing': 'Ongoing', 'title': 'Intentional use: (subsistence/small scale) [harvest]', 'invasive': None, 'scope': 'Unknown'}, {'code': '5.4.2', 'score': 'Unknown', 'sev…	<span style="font-style: italic;">Acanthurus achilles</span> is targeted heavily in Hawaii and there may be evidence of declines in some parts.&#160;In Kona, Hawaii, there were fewer individuals observed at collection than at control sites (Tissot and Hallacher 2003).<br/><br/>Surgeonfishes show varying degrees of habitat preference and utilization of coral reef habitats, with some species spendi…
177961	ACTINOPTERYGII	PERCIFORMES	ACANTHURIDAE	Acanthurus	nubilus	Least Concern	Marine	[{'habitat': 'Outer Reef Channel', 'code': '9.8.1', 'season': None, 'suitability': 'Suitable', 'majorimportance': None}, {'habitat': 'Foreslope (Outer Reef Slope)', 'code': '9.8.3', 'season': None, 'suitability': 'Suitable', 'majorimportance': None}]	[]	There are no major threats known for this species.<br/><br/>Surgeonfishes show varying degrees of habitat preference and utilization of coral reef habitats, with some species spending the majority of their life stages on coral reef while others primarily utilize seagrass beds, mangroves, algal beds, and /or rocky reefs. The majority of surgeonfishes are exclusively found on coral reef habitat, an…
177962	ACTINOPTERYGII	PERCIFORMES	ACANTHURIDAE	Naso	fageni	Least Concern	Marine	[{'habitat': 'Marine Neritic - Subtidal Rock and Rocky Reefs', 'code': '9.2', 'season': None, 'suitability': 'Suitable', 'majorimportance': None}, {'habitat': 'Outer Reef Channel', 'code': '9.8.1', 'season': None, 'suitability': 'Suitable', 'majorimportance': None}, {'habitat': 'Back Slope', 'code': '9.8.2', 'season': None, 'suitability': 'Suitable', 'majorimportance': None}, {'habitat': 'Foreslo…	[]	There are no major threats known for this species.<br/><br/>Surgeonfishes show varying degrees of habitat preference and utilization of coral reef habitats, with some species spending the majority of their life stages on coral reef while others primarily utilize seagrass beds, mangroves, algal beds, and /or rocky reefs. The majority of surgeonfishes are exclusively found on coral reef habitat, an…
177963	ACTINOPTERYGII	PERCIFORMES	ACANTHURIDAE	Naso	mcdadei	Least Concern	Marine	[{'habitat': 'Marine Neritic - Subtidal Rock and Rocky Reefs', 'code': '9.2', 'season': None, 'suitability': 'Suitable', 'majorimportance': None}, {'habitat': 'Foreslope (Outer Reef Slope)', 'code': '9.8.3', 'season': None, 'suitability': 'Suitable', 'majorimportance': None}, {'habitat': 'Inter-Reef Soft Substrate', 'code': '9.8.5', 'season': None, 'suitability': 'Suitable', 'majorimportance': No…	[]	There are no major threats known for this species.<br/><br/>Surgeonfishes show varying degrees of habitat preference and utilization of coral reef habitats, with some species spending the majority of their life stages on coral reef while others primarily utilize seagrass beds, mangroves, algal beds, and /or rocky reefs. The majority of surgeonfishes are exclusively found on coral reef habitat, an…
177964	ACTINOPTERYGII	PERCIFORMES	ACANTHURIDAE	Ctenochaetus	marginatus	Least Concern	Marine	[{'habitat': 'Marine Neritic - Subtidal Rock and Rocky Reefs', 'code': '9.2', 'season': None, 'suitability': 'Suitable', 'majorimportance': None}, {'habitat': 'Foreslope (Outer Reef Slope)', 'code': '9.8.3', 'season': None, 'suitability': 'Suitable', 'majorimportance': None}]	[]	There are no major threats to this species.<br/><br/>Surgeonfishes show varying degrees of habitat preference and utilization of coral reef habitats, with some species spending the majority of their life stages on coral reef while others primarily utilize seagrass beds, mangroves, algal beds, and /or rocky reefs. The majority of surgeonfishes are exclusively found on coral reef habitat, and of th…
177965	ACTINOPTERYGII	PERCIFORMES	ACANTHURIDAE	Acanthurus	triostegus	Least Concern	Marine	[{'habitat': 'Marine Intertidal - Tidepools', 'code': '12.6', 'season': None, 'suitability': 'Suitable', 'majorimportance': None}, {'habitat': 'Marine Neritic - Subtidal Rock and Rocky Reefs', 'code': '9.2', 'season': None, 'suitability': 'Suitable', 'majorimportance': None}, {'habitat': 'Outer Reef Channel', 'code': '9.8.1', 'season': None, 'suitability': 'Suitable', 'majorimportance': None}, {'…	[{'code': '5.4', 'score': 'Unknown', 'severity': 'Unknown', 'timing': 'Ongoing', 'title': 'Fishing & harvesting aquatic resources', 'invasive': None, 'scope': 'Unknown'}, {'code': '5.4.1', 'score': 'Unknown', 'severity': 'Unknown', 'timing': 'Ongoing', 'title': 'Intentional use: (subsistence/small scale) [harvest]', 'invasive': None, 'scope': 'Unknown'}, {'code': '5.4.2', 'score': 'Unknown', 'sev…	Localized fishing for artisanal and recreational fisheries is a threat in some areas.<br/><br/>Surgeonfishes show varying degrees of habitat preference and utilization of coral reef habitats, with some species spending the majority of their life stages on coral reef while others primarily utilize seagrass beds, mangroves, algal beds, and /or rocky reefs. The majority of surgeonfishes are exclusiv…
177966	ACTINOPTERYGII	PERCIFORMES	ACANTHURIDAE	Acanthurus	chronixis	Vulnerable	Marine	[{'habitat': 'Outer Reef Channel', 'code': '9.8.1', 'season': None, 'suitability': 'Suitable', 'majorimportance': None}]	[{'code': '5.4', 'score': 'Unknown', 'severity': 'Unknown', 'timing': 'Ongoing', 'title': 'Fishing & harvesting aquatic resources', 'invasive': None, 'scope': 'Unknown'}, {'code': '5.4.1', 'score': 'Unknown', 'severity': 'Unknown', 'timing': 'Ongoing', 'title': 'Intentional use: (subsistence/small scale) [harvest]', 'invasive': None, 'scope': 'Unknown'}]	Kapingamarangi Atoll is a highly isolated but heavily populated island. Local waters are presumably&#160;heavily fished with spearfishing occurring widely around the island (G. Edgar pers. comm. 2011).<br/><br/>Surgeonfishes show varying degrees of habitat preference and utilization of coral reef habitats, with some species spending the majority of their life stages on coral reef while others pri…
177967	ACTINOPTERYGII	PERCIFORMES	ACANTHURIDAE	Acanthurus	mata	Least Concern	Marine	[{'habitat': 'Outer Reef Channel', 'code': '9.8.1', 'season': None, 'suitability': 'Suitable', 'majorimportance': None}, {'habitat': 'Back Slope', 'code': '9.8.2', 'season': None, 'suitability': 'Suitable', 'majorimportance': None}, {'habitat': 'Foreslope (Outer Reef Slope)', 'code': '9.8.3', 'season': None, 'suitability': 'Suitable', 'majorimportance': None}, {'habitat': 'Inter-Reef Soft Substra…	[{'code': '5.4', 'score': 'Unknown', 'severity': 'Unknown', 'timing': 'Ongoing', 'title': 'Fishing & harvesting aquatic resources', 'invasive': None, 'scope': 'Unknown'}, {'code': '5.4.1', 'score': 'Unknown', 'severity': 'Unknown', 'timing': 'Ongoing', 'title': 'Intentional use: (subsistence/small scale) [harvest]', 'invasive': None, 'scope': 'Unknown'}]	<span style="font-style: italic;">Acanthurus mata </span>is targeted in areas where illegal fishing practices are known to occur (i.e., Coral Triangle Region).<br/><br/>Surgeonfishes show varying degrees of habitat preference and utilization of coral reef habitats, with some species spending the majority of their life stages on coral reef while others primarily utilize seagrass beds, mangroves, a…
177968	ACTINOPTERYGII	PERCIFORMES	ACANTHURIDAE	Naso	caeruleacauda	Least Concern	Marine	[{'habitat': 'Outer Reef Channel', 'code': '9.8.1', 'season': None, 'suitability': 'Suitable', 'majorimportance': None}, {'habitat': 'Foreslope (Outer Reef Slope)', 'code': '9.8.3', 'season': None, 'suitability': 'Suitable', 'majorimportance': None}]	[]	There are no major threats known for this species.<br/><br/>Surgeonfishes show varying degrees of habitat preference and utilization of coral reef habitats, with some species spending the majority of their life stages on coral reef while others primarily utilize seagrass beds, mangroves, algal beds, and /or rocky reefs. The majority of surgeonfishes are exclusively found on coral reef habitat, an…
177969	ACTINOPTERYGII	PERCIFORMES	ACANTHURIDAE	Acanthurus	nigricans	Least Concern	Marine	[{'habitat': 'Marine Neritic - Subtidal Rock and Rocky Reefs', 'code': '9.2', 'season': None, 'suitability': 'Suitable', 'majorimportance': None}, {'habitat': 'Outer Reef Channel', 'code': '9.8.1', 'season': None, 'suitability': 'Suitable', 'majorimportance': None}, {'habitat': 'Back Slope', 'code': '9.8.2', 'season': None, 'suitability': 'Suitable', 'majorimportance': None}, {'habitat': 'Foreslo…	[]	There are no major threats known for this species.<br/><br/>Surgeonfishes show varying degrees of habitat preference and utilization of coral reef habitats, with some species spending the majority of their life stages on coral reef while others primarily utilize seagrass beds, mangroves, algal beds, and /or rocky reefs. The majority of surgeonfishes are exclusively found on coral reef habitat, an…
177970	ACTINOPTERYGII	PERCIFORMES	ACANTHURIDAE	Naso	unicornis	Least Concern	Marine	[{'habitat': 'Marine Neritic - Subtidal Rock and Rocky Reefs', 'code': '9.2', 'season': None, 'suitability': 'Suitable', 'majorimportance': None}, {'habitat': 'Outer Reef Channel', 'code': '9.8.1', 'season': None, 'suitability': 'Suitable', 'majorimportance': None}, {'habitat': 'Back Slope', 'code': '9.8.2', 'season': None, 'suitability': 'Suitable', 'majorimportance': None}, {'habitat': 'Foreslo…	[{'code': '5.4', 'score': 'Unknown', 'severity': 'Unknown', 'timing': 'Ongoing', 'title': 'Fishing & harvesting aquatic resources', 'invasive': None, 'scope': 'Unknown'}, {'code': '5.4.1', 'score': 'Unknown', 'severity': 'Unknown', 'timing': 'Ongoing', 'title': 'Intentional use: (subsistence/small scale) [harvest]', 'invasive': None, 'scope': 'Unknown'}]	<span style="font-style: italic;">Naso unicornis</span> is a targeted food fish. There have been significant reductions in biomass in parts of its range.<br/><br/>Surgeonfishes show varying degrees of habitat preference and utilization of coral reef habitats, with some species spending the majority of their life stages on coral reef while others primarily utilize seagrass beds, mangroves, algal b…
177971	ACTINOPTERYGII	PERCIFORMES	ACANTHURIDAE	Acanthurus	blochii	Least Concern	Marine	[{'habitat': 'Outer Reef Channel', 'code': '9.8.1', 'season': None, 'suitability': 'Suitable', 'majorimportance': None}, {'habitat': 'Back Slope', 'code': '9.8.2', 'season': None, 'suitability': 'Suitable', 'majorimportance': None}, {'habitat': 'Foreslope (Outer Reef Slope)', 'code': '9.8.3', 'season': None, 'suitability': 'Suitable', 'majorimportance': None}, {'habitat': 'Lagoon', 'code': '9.8.4…	[{'code': '5.4', 'score': 'Unknown', 'severity': 'Unknown', 'timing': 'Ongoing', 'title': 'Fishing & harvesting aquatic resources', 'invasive': None, 'scope': 'Unknown'}, {'code': '5.4.1', 'score': 'Unknown', 'severity': 'Unknown', 'timing': 'Ongoing', 'title': 'Intentional use: (subsistence/small scale) [harvest]', 'invasive': None, 'scope': 'Unknown'}]	<span style="font-style: italic;">Acanthurus blochii</span> is a targeted food fish in parts of its range. There have been localized declines due to fishing in the Philippines.<br/><br/>Surgeonfishes show varying degrees of habitat preference and utilization of coral reef habitats, with some species spending the majority of their life stages on coral reef while others primarily utilize seagrass b…
177972	ACTINOPTERYGII	PERCIFORMES	ACANTHURIDAE	Paracanthurus	hepatus	Least Concern	Marine	[{'habitat': 'Outer Reef Channel', 'code': '9.8.1', 'season': None, 'suitability': 'Suitable', 'majorimportance': None}, {'habitat': 'Foreslope (Outer Reef Slope)', 'code': '9.8.3', 'season': None, 'suitability': 'Suitable', 'majorimportance': None}]	[{'code': '1.1', 'score': 'Unknown', 'severity': 'Unknown', 'timing': 'Ongoing', 'title': 'Housing & urban areas', 'invasive': None, 'scope': 'Unknown'}, {'code': '1.3', 'score': 'Unknown', 'severity': 'Unknown', 'timing': 'Ongoing', 'title': 'Tourism & recreation areas', 'invasive': None, 'scope': 'Unknown'}, {'code': '5.4', 'score': 'Unknown', 'severity': 'Unknown', 'timing': 'Ongoing', 'title'…	Overexploitation and destructive fishing practices are threats in some parts of its range (Kinch 2004, Reksodihardjo-Lilley and Lilley 2007).<br/><br/>Surgeonfishes show varying degrees of habitat preference and utilization of coral reef habitats, with some species spending the majority of their life stages on coral reef while others primarily utilize seagrass beds, mangroves, algal beds, and /or…
177973	ACTINOPTERYGII	PERCIFORMES	ACANTHURIDAE	Zebrasoma	gemmatum	Data Deficient	Marine	[{'habitat': 'Outer Reef Channel', 'code': '9.8.1', 'season': None, 'suitability': 'Suitable', 'majorimportance': None}, {'habitat': 'Foreslope (Outer Reef Slope)', 'code': '9.8.3', 'season': None, 'suitability': 'Suitable', 'majorimportance': None}, {'habitat': 'Inter-Reef Rubble Substrate', 'code': '9.8.6', 'season': None, 'suitability': 'Suitable', 'majorimportance': None}]	[]	There are no major threats known for this species.<br/><br/>Surgeonfishes show varying degrees of habitat preference and utilization of coral reef habitats, with some species spending the majority of their life stages on coral reef while others primarily utilize seagrass beds, mangroves, algal beds, and /or rocky reefs. The majority of surgeonfishes are exclusively found on coral reef habitat, an…
177974	ACTINOPTERYGII	PERCIFORMES	ACANTHURIDAE	Acanthurus	auranticavus	Least Concern	Marine	[{'habitat': 'Outer Reef Channel', 'code': '9.8.1', 'season': None, 'suitability': 'Suitable', 'majorimportance': None}, {'habitat': 'Foreslope (Outer Reef Slope)', 'code': '9.8.3', 'season': None, 'suitability': 'Suitable', 'majorimportance': None}, {'habitat': 'Lagoon', 'code': '9.8.4', 'season': None, 'suitability': 'Suitable', 'majorimportance': None}]	[]	There are no major threats known for this species.<br/><br/>Surgeonfishes show varying degrees of habitat preference and utilization of coral reef habitats, with some species spending the majority of their life stages on coral reef while others primarily utilize seagrass beds, mangroves, algal beds, and /or rocky reefs. The majority of surgeonfishes are exclusively found on coral reef habitat, an…
177975	ACTINOPTERYGII	PERCIFORMES	ACANTHURIDAE	Naso	minor	Least Concern	Marine	[{'habitat': 'Outer Reef Channel', 'code': '9.8.1', 'season': None, 'suitability': 'Suitable', 'majorimportance': None}, {'habitat': 'Foreslope (Outer Reef Slope)', 'code': '9.8.3', 'season': None, 'suitability': 'Suitable', 'majorimportance': None}]	[]	There are no major threats known for this species.<br/><br/>Surgeonfishes show varying degrees of habitat preference and utilization of coral reef habitats, with some species spending the majority of their life stages on coral reef while others primarily utilize seagrass beds, mangroves, algal beds, and /or rocky reefs. The majority of surgeonfishes are exclusively found on coral reef habitat, an…
177976	ACTINOPTERYGII	PERCIFORMES	ACANTHURIDAE	Acanthurus	reversus	Least Concern	Marine	[{'habitat': 'Marine Neritic - Subtidal Rock and Rocky Reefs', 'code': '9.2', 'season': None, 'suitability': 'Suitable', 'majorimportance': None}, {'habitat': 'Marine Neritic - Subtidal Loose Rock/pebble/gravel', 'code': '9.3', 'season': None, 'suitability': 'Suitable', 'majorimportance': None}, {'habitat': 'Foreslope (Outer Reef Slope)', 'code': '9.8.3', 'season': None, 'suitability': 'Suitable'…	[]	There are no major threats known for this species.<br/><br/>Surgeonfishes show varying degrees of habitat preference and utilization of coral reef habitats, with some species spending the majority of their life stages on coral reef while others primarily utilize seagrass beds, mangroves, algal beds, and /or rocky reefs. The majority of surgeonfishes are exclusively found on coral reef habitat, an…
177977	ACTINOPTERYGII	PERCIFORMES	ACANTHURIDAE	Acanthurus	japonicus	Least Concern	Marine	[{'habitat': 'Outer Reef Channel', 'code': '9.8.1', 'season': None, 'suitability': 'Suitable', 'majorimportance': None}, {'habitat': 'Back Slope', 'code': '9.8.2', 'season': None, 'suitability': 'Suitable', 'majorimportance': None}, {'habitat': 'Foreslope (Outer Reef Slope)', 'code': '9.8.3', 'season': None, 'suitability': 'Suitable', 'majorimportance': None}, {'habitat': 'Lagoon', 'code': '9.8.4…	[]	There are no major threats known for this species.<br/><br/>Surgeonfishes show varying degrees of habitat preference and utilization of coral reef habitats, with some species spending the majority of their life stages on coral reef while others primarily utilize seagrass beds, mangroves, algal beds, and /or rocky reefs. The majority of surgeonfishes are exclusively found on coral reef habitat, an…
177978	ACTINOPTERYGII	PERCIFORMES	ACANTHURIDAE	Acanthurus	bariene	Least Concern	Marine	[{'habitat': 'Outer Reef Channel', 'code': '9.8.1', 'season': None, 'suitability': 'Suitable', 'majorimportance': None}, {'habitat': 'Foreslope (Outer Reef Slope)', 'code': '9.8.3', 'season': None, 'suitability': 'Suitable', 'majorimportance': None}, {'habitat': 'Inter-Reef Soft Substrate', 'code': '9.8.5', 'season': None, 'suitability': 'Suitable', 'majorimportance': None}]	[{'code': '5.4', 'score': 'Unknown', 'severity': 'Unknown', 'timing': 'Ongoing', 'title': 'Fishing & harvesting aquatic resources', 'invasive': None, 'scope': 'Unknown'}, {'code': '5.4.1', 'score': 'Unknown', 'severity': 'Unknown', 'timing': 'Ongoing', 'title': 'Intentional use: (subsistence/small scale) [harvest]', 'invasive': None, 'scope': 'Unknown'}]	The range of this species overlaps the Coral Triangle where it is a targeted food fish. It is found in an area with known prevalence of illegal fishing practices and overfishing.<br/><br/>Surgeonfishes show varying degrees of habitat preference and utilization of coral reef habitats, with some species spending the majority of their life stages on coral reef while others primarily utilize seagrass…
177979	ACTINOPTERYGII	PERCIFORMES	ACANTHURIDAE	Naso	lopezi	Least Concern	Marine	[{'habitat': 'Outer Reef Channel', 'code': '9.8.1', 'season': None, 'suitability': 'Suitable', 'majorimportance': None}, {'habitat': 'Foreslope (Outer Reef Slope)', 'code': '9.8.3', 'season': None, 'suitability': 'Suitable', 'majorimportance': None}]	[{'code': '5.4', 'score': 'Unknown', 'severity': 'Unknown', 'timing': 'Ongoing', 'title': 'Fishing & harvesting aquatic resources', 'invasive': None, 'scope': 'Unknown'}, {'code': '5.4.1', 'score': 'Unknown', 'severity': 'Unknown', 'timing': 'Ongoing', 'title': 'Intentional use: (subsistence/small scale) [harvest]', 'invasive': None, 'scope': 'Unknown'}]	<span style="font-style: italic;">Naso lopezi </span>is targeted in the Philippines. Localized declines are occurring in parts of its distribution.<br/><br/>Surgeonfishes show varying degrees of habitat preference and utilization of coral reef habitats, with some species spending the majority of their life stages on coral reef while others primarily utilize seagrass beds, mangroves, algal beds, a…
177980	ACTINOPTERYGII	PERCIFORMES	ACANTHURIDAE	Naso	thynnoides	Least Concern	Marine	[{'habitat': 'Back Slope', 'code': '9.8.2', 'season': None, 'suitability': 'Suitable', 'majorimportance': None}, {'habitat': 'Foreslope (Outer Reef Slope)', 'code': '9.8.3', 'season': None, 'suitability': 'Suitable', 'majorimportance': None}, {'habitat': 'Inter-Reef Soft Substrate', 'code': '9.8.5', 'season': None, 'suitability': 'Suitable', 'majorimportance': None}, {'habitat': 'Inter-Reef Rubbl…	[{'code': '5.4', 'score': 'Unknown', 'severity': 'Unknown', 'timing': 'Ongoing', 'title': 'Fishing & harvesting aquatic resources', 'invasive': None, 'scope': 'Unknown'}, {'code': '5.4.1', 'score': 'Unknown', 'severity': 'Unknown', 'timing': 'Ongoing', 'title': 'Intentional use: (subsistence/small scale) [harvest]', 'invasive': None, 'scope': 'Unknown'}]	Fishing may cause some localized declines.<br/><br/>Surgeonfishes show varying degrees of habitat preference and utilization of coral reef habitats, with some species spending the majority of their life stages on coral reef while others primarily utilize seagrass beds, mangroves, algal beds, and /or rocky reefs. The majority of surgeonfishes are exclusively found on coral reef habitat, and of the…
177981	ACTINOPTERYGII	PERCIFORMES	ACANTHURIDAE	Acanthurus	dussumieri	Least Concern	Marine	[{'habitat': 'Outer Reef Channel', 'code': '9.8.1', 'season': None, 'suitability': 'Suitable', 'majorimportance': None}, {'habitat': 'Back Slope', 'code': '9.8.2', 'season': None, 'suitability': 'Suitable', 'majorimportance': None}, {'habitat': 'Foreslope (Outer Reef Slope)', 'code': '9.8.3', 'season': None, 'suitability': 'Suitable', 'majorimportance': None}, {'habitat': 'Lagoon', 'code': '9.8.4…	[{'code': '5.4', 'score': 'Unknown', 'severity': 'Unknown', 'timing': 'Ongoing', 'title': 'Fishing & harvesting aquatic resources', 'invasive': None, 'scope': 'Unknown'}, {'code': '5.4.1', 'score': 'Unknown', 'severity': 'Unknown', 'timing': 'Ongoing', 'title': 'Intentional use: (subsistence/small scale) [harvest]', 'invasive': None, 'scope': 'Unknown'}]	<span style="font-style: italic;">Acanthurus dussumieri</span> is a targeted food fish in parts of its range. It is the most landed Acanthurid species in the Hawaii commercial fishery. In parts of its distribution (e.g., Coral Triangle), it is harvested in areas with known occurrence of illegal fishing practices.<br/><br/>Surgeonfishes show varying degrees of habitat preference and utilization of…
177982	ACTINOPTERYGII	PERCIFORMES	ACANTHURIDAE	Acanthurus	chirurgus	Least Concern	Marine	[{'habitat': 'Outer Reef Channel', 'code': '9.8.1', 'season': None, 'suitability': 'Suitable', 'majorimportance': None}, {'habitat': 'Back Slope', 'code': '9.8.2', 'season': None, 'suitability': 'Suitable', 'majorimportance': None}, {'habitat': 'Foreslope (Outer Reef Slope)', 'code': '9.8.3', 'season': None, 'suitability': 'Suitable', 'majorimportance': None}, {'habitat': 'Lagoon', 'code': '9.8.4…	[{'code': '5.4', 'score': 'Unknown', 'severity': 'Unknown', 'timing': 'Ongoing', 'title': 'Fishing & harvesting aquatic resources', 'invasive': None, 'scope': 'Unknown'}, {'code': '5.4.1', 'score': 'Unknown', 'severity': 'Unknown', 'timing': 'Ongoing', 'title': 'Intentional use: (subsistence/small scale) [harvest]', 'invasive': None, 'scope': 'Unknown'}]	<span style="font-style: italic;">Acanthurus chirurgus</span> is heavily fished in parts of its range (Haiti and Jamaica).<br/><br/>Surgeonfishes show varying degrees of habitat preference and utilization of coral reef habitats, with some species spending the majority of their life stages on coral reef while others primarily utilize seagrass beds, mangroves, algal beds, and /or rocky reefs. The m…
177983	ACTINOPTERYGII	PERCIFORMES	ACANTHURIDAE	Naso	brachycentron	Least Concern	Marine	[{'habitat': 'Outer Reef Channel', 'code': '9.8.1', 'season': None, 'suitability': 'Suitable', 'majorimportance': None}, {'habitat': 'Foreslope (Outer Reef Slope)', 'code': '9.8.3', 'season': None, 'suitability': 'Suitable', 'majorimportance': None}]	[]	There are no major threats known for this species.<br/><br/>Surgeonfishes show varying degrees of habitat preference and utilization of coral reef habitats, with some species spending the majority of their life stages on coral reef while others primarily utilize seagrass beds, mangroves, algal beds, and /or rocky reefs. The majority of surgeonfishes are exclusively found on coral reef habitat, an…
177984	ACTINOPTERYGII	PERCIFORMES	ACANTHURIDAE	Acanthurus	polyzona	Data Deficient	Marine	[{'habitat': 'Marine Intertidal - Tidepools', 'code': '12.6', 'season': None, 'suitability': 'Suitable', 'majorimportance': None}, {'habitat': 'Marine Intertidal - Mangrove Submerged Roots', 'code': '12.7', 'season': None, 'suitability': 'Suitable', 'majorimportance': None}, {'habitat': 'Back Slope', 'code': '9.8.2', 'season': None, 'suitability': 'Suitable', 'majorimportance': None}]	[]	There are no major threats known for this species.<br/><br/>Surgeonfishes show varying degrees of habitat preference and utilization of coral reef habitats, with some species spending the majority of their life stages on coral reef while others primarily utilize seagrass beds, mangroves, algal beds, and /or rocky reefs. The majority of surgeonfishes are exclusively found on coral reef habitat, an…
177985	ACTINOPTERYGII	PERCIFORMES	ACANTHURIDAE	Acanthurus	bahianus	Least Concern	Marine	[{'habitat': 'Marine Intertidal - Rocky Shoreline', 'code': '12.1', 'season': None, 'suitability': 'Suitable', 'majorimportance': None}, {'habitat': 'Marine Intertidal - Tidepools', 'code': '12.6', 'season': None, 'suitability': 'Suitable', 'majorimportance': None}, {'habitat': 'Outer Reef Channel', 'code': '9.8.1', 'season': None, 'suitability': 'Suitable', 'majorimportance': None}, {'habitat': …	[]	There is no information at present time indicating that this species is experiencing localized declines from fishing in parts of its range. Additional research is needed to determine the effects of harvesting to this species and to what extent it is being utilized in its range of distribution.<br/><br/>Surgeonfishes show varying degrees of habitat preference and utilization of coral reef habitats…
177986	ACTINOPTERYGII	PERCIFORMES	ACANTHURIDAE	Ctenochaetus	tominiensis	Least Concern	Marine	[{'habitat': 'Foreslope (Outer Reef Slope)', 'code': '9.8.3', 'season': None, 'suitability': 'Suitable', 'majorimportance': None}]	[]	There are no major threats known for this species.<br/><br/>Surgeonfishes show varying degrees of habitat preference and utilization of coral reef habitats, with some species spending the majority of their life stages on coral reef while others primarily utilize seagrass beds, mangroves, algal beds, and /or rocky reefs. The majority of surgeonfishes are exclusively found on coral reef habitat, an…
177987	ACTINOPTERYGII	PERCIFORMES	ACANTHURIDAE	Acanthurus	sohal	Least Concern	Marine	[{'habitat': 'Outer Reef Channel', 'code': '9.8.1', 'season': None, 'suitability': 'Suitable', 'majorimportance': None}, {'habitat': 'Foreslope (Outer Reef Slope)', 'code': '9.8.3', 'season': None, 'suitability': 'Suitable', 'majorimportance': None}]	[{'code': '5.4', 'score': 'Unknown', 'severity': 'Unknown', 'timing': 'Ongoing', 'title': 'Fishing & harvesting aquatic resources', 'invasive': None, 'scope': 'Unknown'}, {'code': '5.4.1', 'score': 'Unknown', 'severity': 'Unknown', 'timing': 'Ongoing', 'title': 'Intentional use: (subsistence/small scale) [harvest]', 'invasive': None, 'scope': 'Unknown'}]	There have been localized population declines recorded from Saudi Arabia.<br/><br/>Surgeonfishes show varying degrees of habitat preference and utilization of coral reef habitats, with some species spending the majority of their life stages on coral reef while others primarily utilize seagrass beds, mangroves, algal beds, and /or rocky reefs. The majority of surgeonfishes are exclusively found on…
177988	ACTINOPTERYGII	PERCIFORMES	ACANTHURIDAE	Naso	annulatus	Least Concern	Marine	[{'habitat': 'Outer Reef Channel', 'code': '9.8.1', 'season': None, 'suitability': 'Suitable', 'majorimportance': None}, {'habitat': 'Foreslope (Outer Reef Slope)', 'code': '9.8.3', 'season': None, 'suitability': 'Suitable', 'majorimportance': None}]	[]	There are no major threats known for this species.<br/><br/>Surgeonfishes show varying degrees of habitat preference and utilization of coral reef habitats, with some species spending the majority of their life stages on coral reef while others primarily utilize seagrass beds, mangroves, algal beds, and /or rocky reefs. The majority of surgeonfishes are exclusively found on coral reef habitat, an…
177989	ACTINOPTERYGII	PERCIFORMES	ACANTHURIDAE	Acanthurus	xanthopterus	Least Concern	Marine	[{'habitat': 'Marine Neritic - Subtidal Rock and Rocky Reefs', 'code': '9.2', 'season': None, 'suitability': 'Suitable', 'majorimportance': None}, {'habitat': 'Marine Neritic - Subtidal Loose Rock/pebble/gravel', 'code': '9.3', 'season': None, 'suitability': 'Suitable', 'majorimportance': None}, {'habitat': 'Marine Neritic - Subtidal Sandy', 'code': '9.4', 'season': None, 'suitability': 'Suitable…	[{'code': '5.4', 'score': 'Unknown', 'severity': 'Unknown', 'timing': 'Ongoing', 'title': 'Fishing & harvesting aquatic resources', 'invasive': None, 'scope': 'Unknown'}, {'code': '5.4.1', 'score': 'Unknown', 'severity': 'Unknown', 'timing': 'Ongoing', 'title': 'Intentional use: (subsistence/small scale) [harvest]', 'invasive': None, 'scope': 'Unknown'}]	<span style="font-style: italic;">Acanthurus xanthopterus</span> is of minor importance in commercial fisheries and in the aquarium trade. There may be some localized population declines from fishing. <br/><br/>Surgeonfishes show varying degrees of habitat preference and utilization of coral reef habitats, with some species spending the majority of their life stages on coral reef while others pri…
177990	ACTINOPTERYGII	PERCIFORMES	ACANTHURIDAE	Naso	brevirostris	Least Concern	Marine	[{'habitat': 'Marine Neritic - Subtidal Rock and Rocky Reefs', 'code': '9.2', 'season': None, 'suitability': 'Suitable', 'majorimportance': None}, {'habitat': 'Outer Reef Channel', 'code': '9.8.1', 'season': None, 'suitability': 'Suitable', 'majorimportance': None}, {'habitat': 'Back Slope', 'code': '9.8.2', 'season': None, 'suitability': 'Suitable', 'majorimportance': None}, {'habitat': 'Foreslo…	[]	There are no major threats known for this species.<br/><br/>Surgeonfishes show varying degrees of habitat preference and utilization of coral reef habitats, with some species spending the majority of their life stages on coral reef while others primarily utilize seagrass beds, mangroves, algal beds, and /or rocky reefs. The majority of surgeonfishes are exclusively found on coral reef habitat, an…
177991	ACTINOPTERYGII	PERCIFORMES	ACANTHURIDAE	Acanthurus	olivaceus	Least Concern	Marine	[{'habitat': 'Marine Neritic - Subtidal Rock and Rocky Reefs', 'code': '9.2', 'season': None, 'suitability': 'Suitable', 'majorimportance': None}, {'habitat': 'Outer Reef Channel', 'code': '9.8.1', 'season': None, 'suitability': 'Suitable', 'majorimportance': None}, {'habitat': 'Back Slope', 'code': '9.8.2', 'season': None, 'suitability': 'Suitable', 'majorimportance': None}, {'habitat': 'Foreslo…	[]	There are no major threats known for this species.<br/><br/>Surgeonfishes show varying degrees of habitat preference and utilization of coral reef habitats, with some species spending the majority of their life stages on coral reef while others primarily utilize seagrass beds, mangroves, algal beds, and /or rocky reefs. The majority of surgeonfishes are exclusively found on coral reef habitat, an…
177992	ACTINOPTERYGII	PERCIFORMES	ACANTHURIDAE	Ctenochaetus	truncatus	Least Concern	Marine	[{'habitat': 'Marine Neritic - Subtidal Rock and Rocky Reefs', 'code': '9.2', 'season': None, 'suitability': 'Suitable', 'majorimportance': None}, {'habitat': 'Foreslope (Outer Reef Slope)', 'code': '9.8.3', 'season': None, 'suitability': 'Suitable', 'majorimportance': None}]	[]	There are no major threats known for this species.<br/><br/>Surgeonfishes show varying degrees of habitat preference and utilization of coral reef habitats, with some species spending the majority of their life stages on coral reef while others primarily utilize seagrass beds, mangroves, algal beds, and /or rocky reefs. The majority of surgeonfishes are exclusively found on coral reef habitat, an…
177993	ACTINOPTERYGII	PERCIFORMES	ACANTHURIDAE	Acanthurus	lineatus	Least Concern	Marine	[{'habitat': 'Outer Reef Channel', 'code': '9.8.1', 'season': None, 'suitability': 'Suitable', 'majorimportance': None}, {'habitat': 'Back Slope', 'code': '9.8.2', 'season': None, 'suitability': 'Suitable', 'majorimportance': None}, {'habitat': 'Foreslope (Outer Reef Slope)', 'code': '9.8.3', 'season': None, 'suitability': 'Suitable', 'majorimportance': None}, {'habitat': 'Lagoon', 'code': '9.8.4…	[{'code': '5.4', 'score': 'Unknown', 'severity': 'Unknown', 'timing': 'Ongoing', 'title': 'Fishing & harvesting aquatic resources', 'invasive': None, 'scope': 'Unknown'}, {'code': '5.4.1', 'score': 'Unknown', 'severity': 'Unknown', 'timing': 'Ongoing', 'title': 'Intentional use: (subsistence/small scale) [harvest]', 'invasive': None, 'scope': 'Unknown'}, {'code': '5.4.2', 'score': 'Unknown', 'sev…	There were significant reductions in biomass between fished and protected areas reported in the Philippines (Stockwell <span style="font-style: italic;">et al. </span>2009). In American Samoa, indicators of fishing pressure did not point to significant overfishing over a 9-year period (Craig<span style="font-style: italic;"> et al.</span> 1997). <br/><br/>The status of reef fisheries in American …
177994	ACTINOPTERYGII	PERCIFORMES	ACANTHURIDAE	Acanthurus	leucocheilus	Least Concern	Marine	[{'habitat': 'Back Slope', 'code': '9.8.2', 'season': None, 'suitability': 'Suitable', 'majorimportance': None}, {'habitat': 'Foreslope (Outer Reef Slope)', 'code': '9.8.3', 'season': None, 'suitability': 'Suitable', 'majorimportance': None}, {'habitat': 'Lagoon', 'code': '9.8.4', 'season': None, 'suitability': 'Suitable', 'majorimportance': None}]	[]	There are no major threats known for this species.<br/><br/>Surgeonfishes show varying degrees of habitat preference and utilization of coral reef habitats, with some species spending the majority of their life stages on coral reef while others primarily utilize seagrass beds, mangroves, algal beds, and /or rocky reefs. The majority of surgeonfishes are exclusively found on coral reef habitat, an…
177995	ACTINOPTERYGII	PERCIFORMES	ACANTHURIDAE	Acanthurus	guttatus	Least Concern	Marine	[{'habitat': 'Outer Reef Channel', 'code': '9.8.1', 'season': None, 'suitability': 'Suitable', 'majorimportance': None}, {'habitat': 'Foreslope (Outer Reef Slope)', 'code': '9.8.3', 'season': None, 'suitability': 'Suitable', 'majorimportance': None}]	[]	There are no major threats known for this species.<br/><br/>Surgeonfishes show varying degrees of habitat preference and utilization of coral reef habitats, with some species spending the majority of their life stages on coral reef while others primarily utilize seagrass beds, mangroves, algal beds, and /or rocky reefs. The majority of surgeonfishes are exclusively found on coral reef habitat, an…
177997	ACTINOPTERYGII	PERCIFORMES	ACANTHURIDAE	Acanthurus	tennentii	Least Concern	Marine	[{'habitat': 'Marine Neritic - Subtidal Rock and Rocky Reefs', 'code': '9.2', 'season': None, 'suitability': 'Suitable', 'majorimportance': None}, {'habitat': 'Marine Neritic - Subtidal Loose Rock/pebble/gravel', 'code': '9.3', 'season': None, 'suitability': 'Suitable', 'majorimportance': None}, {'habitat': 'Outer Reef Channel', 'code': '9.8.1', 'season': None, 'suitability': 'Suitable', 'majorim…	[{'code': '5.4', 'score': 'Unknown', 'severity': 'Unknown', 'timing': 'Ongoing', 'title': 'Fishing & harvesting aquatic resources', 'invasive': None, 'scope': 'Unknown'}, {'code': '5.4.1', 'score': 'Unknown', 'severity': 'Unknown', 'timing': 'Ongoing', 'title': 'Intentional use: (subsistence/small scale) [harvest]', 'invasive': None, 'scope': 'Unknown'}]	There are indications of localized population declines from fishing in Kenya.<br/><br/>Surgeonfishes show varying degrees of habitat preference and utilization of coral reef habitats, with some species spending the majority of their life stages on coral reef while others primarily utilize seagrass beds, mangroves, algal beds, and /or rocky reefs. The majority of surgeonfishes are exclusively foun…
177998	ACTINOPTERYGII	PERCIFORMES	ACANTHURIDAE	Acanthurus	tristis	Least Concern	Marine	[{'habitat': 'Marine Neritic - Subtidal Sandy', 'code': '9.4', 'season': None, 'suitability': 'Suitable', 'majorimportance': None}, {'habitat': 'Back Slope', 'code': '9.8.2', 'season': None, 'suitability': 'Suitable', 'majorimportance': None}, {'habitat': 'Foreslope (Outer Reef Slope)', 'code': '9.8.3', 'season': None, 'suitability': 'Suitable', 'majorimportance': None}, {'habitat': 'Lagoon', 'co…	[]	There are no major threats known for this species.<br/><br/>Surgeonfishes show varying degrees of habitat preference and utilization of coral reef habitats, with some species spending the majority of their life stages on coral reef while others primarily utilize seagrass beds, mangroves, algal beds, and /or rocky reefs. The majority of surgeonfishes are exclusively found on coral reef habitat, an…
177999	ACTINOPTERYGII	PERCIFORMES	ACANTHURIDAE	Acanthurus	nigroris	Least Concern	Marine	[{'habitat': 'Marine Neritic - Subtidal Rock and Rocky Reefs', 'code': '9.2', 'season': None, 'suitability': 'Suitable', 'majorimportance': None}, {'habitat': 'Marine Neritic - Subtidal Loose Rock/pebble/gravel', 'code': '9.3', 'season': None, 'suitability': 'Suitable', 'majorimportance': None}, {'habitat': 'Outer Reef Channel', 'code': '9.8.1', 'season': None, 'suitability': 'Suitable', 'majorim…	[]	There are no major threats known for this species. There was no difference in abundance observed between the main Hawaiian Islands and Northwest Hawaiian Islands (L. Rocha pers. comm. 2010).<br/><br/>Surgeonfishes show varying degrees of habitat preference and utilization of coral reef habitats, with some species spending the majority of their life stages on coral reef while others primarily util…
178000	ACTINOPTERYGII	PERCIFORMES	ACANTHURIDAE	Acanthurus	leucosternon	Least Concern	Marine	[{'habitat': 'Outer Reef Channel', 'code': '9.8.1', 'season': None, 'suitability': 'Suitable', 'majorimportance': None}, {'habitat': 'Foreslope (Outer Reef Slope)', 'code': '9.8.3', 'season': None, 'suitability': 'Suitable', 'majorimportance': None}]	[{'code': '5.4', 'score': 'Unknown', 'severity': 'Unknown', 'timing': 'Ongoing', 'title': 'Fishing & harvesting aquatic resources', 'invasive': None, 'scope': 'Unknown'}, {'code': '5.4.1', 'score': 'Unknown', 'severity': 'Unknown', 'timing': 'Ongoing', 'title': 'Intentional use: (subsistence/small scale) [harvest]', 'invasive': None, 'scope': 'Unknown'}, {'code': '5.4.2', 'score': 'Unknown', 'sev…	<span style="font-style: italic;">Acanthurus leucosternon</span> is a targeted fish species and is generally rare in parts of its range (J.H. Choat pers. comm. 2010). On the east African coast, differences were observed in densities between fished (average of 0.56 per 500 m<sup>2</sup>) and protected areas (average of 2.27 per 500 m<sup>2</sup>)&#160; (McClanahan <span style="font-style: italic;"…
178001	ACTINOPTERYGII	PERCIFORMES	ACANTHURIDAE	Zebrasoma	rostratum	Data Deficient	Marine	[{'habitat': 'Marine Neritic - Subtidal Rock and Rocky Reefs', 'code': '9.2', 'season': None, 'suitability': 'Suitable', 'majorimportance': None}, {'habitat': 'Outer Reef Channel', 'code': '9.8.1', 'season': None, 'suitability': 'Suitable', 'majorimportance': None}, {'habitat': 'Back Slope', 'code': '9.8.2', 'season': None, 'suitability': 'Suitable', 'majorimportance': None}, {'habitat': 'Foreslo…	[]	There are no major threats known for this species.<br/><br/>Surgeonfishes show varying degrees of habitat preference and utilization of coral reef habitats, with some species spending the majority of their life stages on coral reef while others primarily utilize seagrass beds, mangroves, algal beds, and /or rocky reefs. The majority of surgeonfishes are exclusively found on coral reef habitat, an…
178002	ACTINOPTERYGII	PERCIFORMES	ACANTHURIDAE	Naso	hexacanthus	Least Concern	Marine	[{'habitat': 'Outer Reef Channel', 'code': '9.8.1', 'season': None, 'suitability': 'Suitable', 'majorimportance': None}, {'habitat': 'Back Slope', 'code': '9.8.2', 'season': None, 'suitability': 'Suitable', 'majorimportance': None}, {'habitat': 'Foreslope (Outer Reef Slope)', 'code': '9.8.3', 'season': None, 'suitability': 'Suitable', 'majorimportance': None}, {'habitat': 'Lagoon', 'code': '9.8.4…	[{'code': '5.4', 'score': 'Unknown', 'severity': 'Unknown', 'timing': 'Ongoing', 'title': 'Fishing & harvesting aquatic resources', 'invasive': None, 'scope': 'Unknown'}, {'code': '5.4.1', 'score': 'Unknown', 'severity': 'Unknown', 'timing': 'Ongoing', 'title': 'Intentional use: (subsistence/small scale) [harvest]', 'invasive': None, 'scope': 'Unknown'}]	<span style="font-style: italic;">Naso hexacanthus </span>is a targeted food fish in parts of its range.<br/><br/>Surgeonfishes show varying degrees of habitat preference and utilization of coral reef habitats, with some species spending the majority of their life stages on coral reef while others primarily utilize seagrass beds, mangroves, algal beds, and /or rocky reefs. The majority of surgeon…
178003	ACTINOPTERYGII	PERCIFORMES	ACANTHURIDAE	Naso	tuberosus	Data Deficient	Marine	[{'habitat': 'Foreslope (Outer Reef Slope)', 'code': '9.8.3', 'season': None, 'suitability': 'Suitable', 'majorimportance': None}]	[]	There are no major threats known for this species.<br/><br/>Surgeonfishes show varying degrees of habitat preference and utilization of coral reef habitats, with some species spending the majority of their life stages on coral reef while others primarily utilize seagrass beds, mangroves, algal beds, and /or rocky reefs. The majority of surgeonfishes are exclusively found on coral reef habitat, an…
178004	ACTINOPTERYGII	PERCIFORMES	ACANTHURIDAE	Naso	elegans	Least Concern	Marine	[{'habitat': 'Outer Reef Channel', 'code': '9.8.1', 'season': None, 'suitability': 'Suitable', 'majorimportance': None}, {'habitat': 'Back Slope', 'code': '9.8.2', 'season': None, 'suitability': 'Suitable', 'majorimportance': None}, {'habitat': 'Foreslope (Outer Reef Slope)', 'code': '9.8.3', 'season': None, 'suitability': 'Suitable', 'majorimportance': None}, {'habitat': 'Lagoon', 'code': '9.8.4…	[]	There are no major threats known for this species.<br/><br/>Surgeonfishes show varying degrees of habitat preference and utilization of coral reef habitats, with some species spending the majority of their life stages on coral reef while others primarily utilize seagrass beds, mangroves, algal beds, and /or rocky reefs. The majority of surgeonfishes are exclusively found on coral reef habitat, an…
178005	ACTINOPTERYGII	PERCIFORMES	ACANTHURIDAE	Zebrasoma	scopas	Least Concern	Marine	[{'habitat': 'Marine Neritic - Subtidal Rock and Rocky Reefs', 'code': '9.2', 'season': None, 'suitability': 'Suitable', 'majorimportance': None}, {'habitat': 'Outer Reef Channel', 'code': '9.8.1', 'season': None, 'suitability': 'Suitable', 'majorimportance': None}, {'habitat': 'Back Slope', 'code': '9.8.2', 'season': None, 'suitability': 'Suitable', 'majorimportance': None}, {'habitat': 'Foreslo…	[{'code': '5.4', 'score': 'Unknown', 'severity': 'Unknown', 'timing': 'Ongoing', 'title': 'Fishing & harvesting aquatic resources', 'invasive': None, 'scope': 'Unknown'}, {'code': '5.4.1', 'score': 'Unknown', 'severity': 'Unknown', 'timing': 'Ongoing', 'title': 'Intentional use: (subsistence/small scale) [harvest]', 'invasive': None, 'scope': 'Unknown'}]	<span style="font-style: italic;">Zebrasoma scopas</span> is captured in subsistence fisheries, there may be some localized declines in areas where it is harvested.<br/><br/>Surgeonfishes show varying degrees of habitat preference and utilization of coral reef habitats, with some species spending the majority of their life stages on coral reef while others primarily utilize seagrass beds, mangrov…
178006	ACTINOPTERYGII	PERCIFORMES	ACANTHURIDAE	Acanthurus	grammoptilus	Least Concern	Marine	[{'habitat': 'Marine Neritic - Subtidal Sandy-Mud', 'code': '9.5', 'season': None, 'suitability': 'Suitable', 'majorimportance': None}, {'habitat': 'Foreslope (Outer Reef Slope)', 'code': '9.8.3', 'season': None, 'suitability': 'Suitable', 'majorimportance': None}, {'habitat': 'Inter-Reef Soft Substrate', 'code': '9.8.5', 'season': None, 'suitability': 'Suitable', 'majorimportance': None}, {'habi…	[]	There are no major threats known for this species.<br/><br/>Surgeonfishes show varying degrees of habitat preference and utilization of coral reef habitats, with some species spending the majority of their life stages on coral reef while others primarily utilize seagrass beds, mangroves, algal beds, and /or rocky reefs. The majority of surgeonfishes are exclusively found on coral reef habitat, an…
178007	ACTINOPTERYGII	PERCIFORMES	ACANTHURIDAE	Acanthurus	albipectoralis	Least Concern	Marine	[{'habitat': 'Outer Reef Channel', 'code': '9.8.1', 'season': None, 'suitability': 'Suitable', 'majorimportance': None}, {'habitat': 'Foreslope (Outer Reef Slope)', 'code': '9.8.3', 'season': None, 'suitability': 'Suitable', 'majorimportance': None}]	[]	There are no major threats known for this species.<br/><br/>Surgeonfishes show varying degrees of habitat preference and utilization of coral reef habitats, with some species spending the majority of their life stages on coral reef while others primarily utilize seagrass beds, mangroves, algal beds, and /or rocky reefs. The majority of surgeonfishes are exclusively found on coral reef habitat, an…
178008	ACTINOPTERYGII	PERCIFORMES	ACANTHURIDAE	Acanthurus	thompsoni	Least Concern	Marine	[{'habitat': 'Outer Reef Channel', 'code': '9.8.1', 'season': None, 'suitability': 'Suitable', 'majorimportance': None}, {'habitat': 'Foreslope (Outer Reef Slope)', 'code': '9.8.3', 'season': None, 'suitability': 'Suitable', 'majorimportance': None}]	[{'code': '5.4', 'score': 'Unknown', 'severity': 'Unknown', 'timing': 'Ongoing', 'title': 'Fishing & harvesting aquatic resources', 'invasive': None, 'scope': 'Unknown'}, {'code': '5.4.1', 'score': 'Unknown', 'severity': 'Unknown', 'timing': 'Ongoing', 'title': 'Intentional use: (subsistence/small scale) [harvest]', 'invasive': None, 'scope': 'Unknown'}]	There are indications of localized population declines from fishing in Kenya.<br/><br/>Surgeonfishes show varying degrees of habitat preference and utilization of coral reef habitats, with some species spending the majority of their life stages on coral reef while others primarily utilize seagrass beds, mangroves, algal beds, and /or rocky reefs. The majority of surgeonfishes are exclusively foun…
178009	ACTINOPTERYGII	PERCIFORMES	ACANTHURIDAE	Zebrasoma	xanthurum	Least Concern	Marine	[{'habitat': 'Marine Neritic - Subtidal Rock and Rocky Reefs', 'code': '9.2', 'season': None, 'suitability': 'Suitable', 'majorimportance': None}, {'habitat': 'Outer Reef Channel', 'code': '9.8.1', 'season': None, 'suitability': 'Suitable', 'majorimportance': None}, {'habitat': 'Foreslope (Outer Reef Slope)', 'code': '9.8.3', 'season': None, 'suitability': 'Suitable', 'majorimportance': None}, {'…	[]	There are no major threats known for this species.<br/><br/>Surgeonfishes show varying degrees of habitat preference and utilization of coral reef habitats, with some species spending the majority of their life stages on coral reef while others primarily utilize seagrass beds, mangroves, algal beds, and /or rocky reefs. The majority of surgeonfishes are exclusively found on coral reef habitat, an…
178010	ACTINOPTERYGII	PERCIFORMES	ACANTHURIDAE	Zebrasoma	veliferum	Least Concern	Marine	[{'habitat': 'Marine Neritic - Subtidal Rock and Rocky Reefs', 'code': '9.2', 'season': None, 'suitability': 'Suitable', 'majorimportance': None}, {'habitat': 'Outer Reef Channel', 'code': '9.8.1', 'season': None, 'suitability': 'Suitable', 'majorimportance': None}, {'habitat': 'Back Slope', 'code': '9.8.2', 'season': None, 'suitability': 'Suitable', 'majorimportance': None}, {'habitat': 'Foreslo…	[{'code': '1.1', 'score': 'Unknown', 'severity': 'Unknown', 'timing': 'Ongoing', 'title': 'Housing & urban areas', 'invasive': None, 'scope': 'Unknown'}, {'code': '1.2', 'score': 'Unknown', 'severity': 'Unknown', 'timing': 'Ongoing', 'title': 'Commercial & industrial areas', 'invasive': None, 'scope': 'Unknown'}, {'code': '1.3', 'score': 'Unknown', 'severity': 'Unknown', 'timing': 'Ongoing', 'tit…	<span style="font-style: italic;">Zebrasoma veliferum</span> is a component of subsistence fisheries and is found in localities where coral reef degradation is prevalent.<br/><br/>Surgeonfishes show varying degrees of habitat preference and utilization of coral reef habitats, with some species spending the majority of their life stages on coral reef while others primarily utilize seagrass beds, m…
178011	ACTINOPTERYGII	PERCIFORMES	ACANTHURIDAE	Acanthurus	leucopareius	Least Concern	Marine	[{'habitat': 'Outer Reef Channel', 'code': '9.8.1', 'season': None, 'suitability': 'Suitable', 'majorimportance': None}, {'habitat': 'Foreslope (Outer Reef Slope)', 'code': '9.8.3', 'season': None, 'suitability': 'Suitable', 'majorimportance': None}]	[]	There are no major threats known for this species.<br/><br/>Surgeonfishes show varying degrees of habitat preference and utilization of coral reef habitats, with some species spending the majority of their life stages on coral reef while others primarily utilize seagrass beds, mangroves, algal beds, and /or rocky reefs. The majority of surgeonfishes are exclusively found on coral reef habitat, an…
178012	ACTINOPTERYGII	PERCIFORMES	ACANTHURIDAE	Ctenochaetus	striatus	Least Concern	Marine	[{'habitat': 'Marine Neritic - Subtidal Rock and Rocky Reefs', 'code': '9.2', 'season': None, 'suitability': 'Suitable', 'majorimportance': None}, {'habitat': 'Outer Reef Channel', 'code': '9.8.1', 'season': None, 'suitability': 'Suitable', 'majorimportance': None}, {'habitat': 'Back Slope', 'code': '9.8.2', 'season': None, 'suitability': 'Suitable', 'majorimportance': None}, {'habitat': 'Foreslo…	[{'code': '5.4', 'score': 'Unknown', 'severity': 'Unknown', 'timing': 'Ongoing', 'title': 'Fishing & harvesting aquatic resources', 'invasive': None, 'scope': 'Unknown'}, {'code': '5.4.1', 'score': 'Unknown', 'severity': 'Unknown', 'timing': 'Ongoing', 'title': 'Intentional use: (subsistence/small scale) [harvest]', 'invasive': None, 'scope': 'Unknown'}]	<span style="font-style: italic;">Ctenochaetus striatus</span> is heavily fished in American Samoa, an overfished, collapsed fishery. There was no relationship found between fishing pressure and longevity, growth or adult size across sampling sites, among which fishing pressure on this species varied from intense to zero (Trip<span style="font-style: italic;"> et al. </span>2008).<br/>The status …
178013	ACTINOPTERYGII	PERCIFORMES	ACANTHURIDAE	Naso	caesius	Least Concern	Marine	[{'habitat': 'Outer Reef Channel', 'code': '9.8.1', 'season': None, 'suitability': 'Suitable', 'majorimportance': None}, {'habitat': 'Foreslope (Outer Reef Slope)', 'code': '9.8.3', 'season': None, 'suitability': 'Suitable', 'majorimportance': None}]	[]	There are no major threats known for this species.<br/><br/>Surgeonfishes show varying degrees of habitat preference and utilization of coral reef habitats, with some species spending the majority of their life stages on coral reef while others primarily utilize seagrass beds, mangroves, algal beds, and /or rocky reefs. The majority of surgeonfishes are exclusively found on coral reef habitat, an…
178014	ACTINOPTERYGII	PERCIFORMES	ACANTHURIDAE	Ctenochaetus	hawaiiensis	Least Concern	Marine	[{'habitat': 'Marine Neritic - Subtidal Rock and Rocky Reefs', 'code': '9.2', 'season': None, 'suitability': 'Suitable', 'majorimportance': None}, {'habitat': 'Foreslope (Outer Reef Slope)', 'code': '9.8.3', 'season': None, 'suitability': 'Suitable', 'majorimportance': None}]	[{'code': '5.4', 'score': 'Unknown', 'severity': 'Unknown', 'timing': 'Ongoing', 'title': 'Fishing & harvesting aquatic resources', 'invasive': None, 'scope': 'Unknown'}, {'code': '5.4.1', 'score': 'Unknown', 'severity': 'Unknown', 'timing': 'Ongoing', 'title': 'Intentional use: (subsistence/small scale) [harvest]', 'invasive': None, 'scope': 'Unknown'}, {'code': '5.4.2', 'score': 'Unknown', 'sev…	<span style="font-style: italic;">Ctenochaetus hawaiiensis</span> is a popular aquarium species. In West Hawaii, it is the 5th most collected aquarium fish. Surveys since 1999 show that there is minimal recruitment (Walsh<span style="font-style: italic;"> et al. </span>2010).<br/><br/>Surgeonfishes show varying degrees of habitat preference and utilization of coral reef habitats, with some specie…
178015	ACTINOPTERYGII	PERCIFORMES	ACANTHURIDAE	Zebrasoma	flavescens	Least Concern	Marine	[{'habitat': 'Marine Neritic - Subtidal Rock and Rocky Reefs', 'code': '9.2', 'season': None, 'suitability': 'Suitable', 'majorimportance': None}, {'habitat': 'Marine Neritic - Subtidal Loose Rock/pebble/gravel', 'code': '9.3', 'season': None, 'suitability': 'Suitable', 'majorimportance': None}, {'habitat': 'Outer Reef Channel', 'code': '9.8.1', 'season': None, 'suitability': 'Suitable', 'majorim…	[{'code': '5.4', 'score': 'Unknown', 'severity': 'Unknown', 'timing': 'Ongoing', 'title': 'Fishing & harvesting aquatic resources', 'invasive': None, 'scope': 'Unknown'}, {'code': '5.4.1', 'score': 'Unknown', 'severity': 'Unknown', 'timing': 'Ongoing', 'title': 'Intentional use: (subsistence/small scale) [harvest]', 'invasive': None, 'scope': 'Unknown'}, {'code': '5.4.2', 'score': 'Unknown', 'sev…	This&#160;is the primary coral reef fish species taken in Hawaii for the aquarium trade (Claisse <span style="font-style: italic;">et al. </span>2009). There have been decreases in Yellow Tang density in areas open to fishing in West Hawaii. The decrease in open areas is attributable to the life history characteristics of this species&#160;as well as the increase in the number of aquarium collect…
178016	ACTINOPTERYGII	PERCIFORMES	ACANTHURIDAE	Prionurus	microlepidotus	Least Concern	Marine	[{'habitat': 'Marine Neritic - Subtidal Rock and Rocky Reefs', 'code': '9.2', 'season': None, 'suitability': 'Suitable', 'majorimportance': None}, {'habitat': 'Outer Reef Channel', 'code': '9.8.1', 'season': None, 'suitability': 'Suitable', 'majorimportance': None}, {'habitat': 'Foreslope (Outer Reef Slope)', 'code': '9.8.3', 'season': None, 'suitability': 'Suitable', 'majorimportance': None}]	[]	There are no major threats known for this species.<br/><br/>Surgeonfishes show varying degrees of habitat preference and utilization of coral reef habitats, with some species spending the majority of their life stages on coral reef while others primarily utilize seagrass beds, mangroves, algal beds, and /or rocky reefs. The majority of surgeonfishes are exclusively found on coral reef habitat, an…
178017	ACTINOPTERYGII	PERCIFORMES	ACANTHURIDAE	Acanthurus	nigricauda	Least Concern	Marine	[{'habitat': 'Marine Neritic - Subtidal Sandy', 'code': '9.4', 'season': None, 'suitability': 'Suitable', 'majorimportance': None}, {'habitat': 'Outer Reef Channel', 'code': '9.8.1', 'season': None, 'suitability': 'Suitable', 'majorimportance': None}, {'habitat': 'Back Slope', 'code': '9.8.2', 'season': None, 'suitability': 'Suitable', 'majorimportance': None}, {'habitat': 'Foreslope (Outer Reef …	[{'code': '5.4', 'score': 'Unknown', 'severity': 'Unknown', 'timing': 'Ongoing', 'title': 'Fishing & harvesting aquatic resources', 'invasive': None, 'scope': 'Unknown'}, {'code': '5.4.1', 'score': 'Unknown', 'severity': 'Unknown', 'timing': 'Ongoing', 'title': 'Intentional use: (subsistence/small scale) [harvest]', 'invasive': None, 'scope': 'Unknown'}]	<span style="font-style: italic;">Acanthurus nigricauda</span> may be affected by targeted fishing in some parts of its range.<br/><br/>Surgeonfishes show varying degrees of habitat preference and utilization of coral reef habitats, with some species spending the majority of their life stages on coral reef while others primarily utilize seagrass beds, mangroves, algal beds, and /or rocky reefs. T…
178018	ACTINOPTERYGII	PERCIFORMES	ACANTHURIDAE	Ctenochaetus	flavicauda	Least Concern	Marine	[{'habitat': 'Foreslope (Outer Reef Slope)', 'code': '9.8.3', 'season': None, 'suitability': 'Suitable', 'majorimportance': None}]	[]	There are no major threats known for this species.<br/><br/>Surgeonfishes show varying degrees of habitat preference and utilization of coral reef habitats, with some species spending the majority of their life stages on coral reef while others primarily utilize seagrass beds, mangroves, algal beds, and /or rocky reefs. The majority of surgeonfishes are exclusively found on coral reef habitat, an…
178019	ACTINOPTERYGII	PERCIFORMES	ACANTHURIDAE	Acanthurus	nigrofuscus	Least Concern	Marine	[{'habitat': 'Marine Neritic - Subtidal Rock and Rocky Reefs', 'code': '9.2', 'season': None, 'suitability': 'Suitable', 'majorimportance': None}, {'habitat': 'Marine Neritic - Subtidal Loose Rock/pebble/gravel', 'code': '9.3', 'season': None, 'suitability': 'Suitable', 'majorimportance': None}, {'habitat': 'Outer Reef Channel', 'code': '9.8.1', 'season': None, 'suitability': 'Suitable', 'majorim…	[]	There was no clear trend in mean biomass observed between fished and marine reserves in the central Philippines (Stockwell <span style="font-style: italic;">et al. </span>2009). There are no major threats known for this species.<br/><br/>Surgeonfishes show varying degrees of habitat preference and utilization of coral reef habitats, with some species spending the majority of their life stages on …
178020	ACTINOPTERYGII	PERCIFORMES	ACANTHURIDAE	Naso	maculatus	Least Concern	Marine	[{'habitat': 'Marine Neritic - Subtidal Rock and Rocky Reefs', 'code': '9.2', 'season': None, 'suitability': 'Suitable', 'majorimportance': None}, {'habitat': 'Outer Reef Channel', 'code': '9.8.1', 'season': None, 'suitability': 'Suitable', 'majorimportance': None}, {'habitat': 'Foreslope (Outer Reef Slope)', 'code': '9.8.3', 'season': None, 'suitability': 'Suitable', 'majorimportance': None}]	[{'code': '5.4', 'score': 'Unknown', 'severity': 'Unknown', 'timing': 'Ongoing', 'title': 'Fishing & harvesting aquatic resources', 'invasive': None, 'scope': 'Unknown'}, {'code': '5.4.1', 'score': 'Unknown', 'severity': 'Unknown', 'timing': 'Ongoing', 'title': 'Intentional use: (subsistence/small scale) [harvest]', 'invasive': None, 'scope': 'Unknown'}]	Fishing poses a threat to this species.<br/><br/>Surgeonfishes show varying degrees of habitat preference and utilization of coral reef habitats, with some species spending the majority of their life stages on coral reef while others primarily utilize seagrass beds, mangroves, algal beds, and /or rocky reefs. The majority of surgeonfishes are exclusively found on coral reef habitat, and of these,…
178021	ACTINOPTERYGII	PERCIFORMES	ACANTHURIDAE	Prionurus	biafraensis	Least Concern	Marine	[{'habitat': 'Marine Neritic - Subtidal Rock and Rocky Reefs', 'code': '9.2', 'season': None, 'suitability': 'Suitable', 'majorimportance': None}]	[]	There are no major threats known for this species.<br/><br/>Surgeonfishes show varying degrees of habitat preference and utilization of coral reef habitats, with some species spending the majority of their life stages on coral reef while others primarily utilize seagrass beds, mangroves, algal beds, and /or rocky reefs. The majority of surgeonfishes are exclusively found on coral reef habitat, an…
178022	ACTINOPTERYGII	PERCIFORMES	ACANTHURIDAE	Acanthurus	pyroferus	Least Concern	Marine	[{'habitat': 'Outer Reef Channel', 'code': '9.8.1', 'season': None, 'suitability': 'Suitable', 'majorimportance': None}, {'habitat': 'Back Slope', 'code': '9.8.2', 'season': None, 'suitability': 'Suitable', 'majorimportance': None}, {'habitat': 'Foreslope (Outer Reef Slope)', 'code': '9.8.3', 'season': None, 'suitability': 'Suitable', 'majorimportance': None}, {'habitat': 'Lagoon', 'code': '9.8.4…	[]	Though targeted for the marine aquarium trade, there are no indications of population declines from harvesting.<br/><br/>Surgeonfishes show varying degrees of habitat preference and utilization of coral reef habitats, with some species spending the majority of their life stages on coral reef while others primarily utilize seagrass beds, mangroves, algal beds, and /or rocky reefs. The majority of …
178023	ACTINOPTERYGII	PERCIFORMES	ACANTHURIDAE	Acanthurus	monroviae	Least Concern	Marine	[{'habitat': 'Marine Neritic - Subtidal Rock and Rocky Reefs', 'code': '9.2', 'season': None, 'suitability': 'Suitable', 'majorimportance': None}, {'habitat': 'Marine Neritic - Subtidal Loose Rock/pebble/gravel', 'code': '9.3', 'season': None, 'suitability': 'Suitable', 'majorimportance': None}]	[]	There are no major threats known for this species.<br/><br/>Surgeonfishes show varying degrees of habitat preference and utilization of coral reef habitats, with some species spending the majority of their life stages on coral reef while others primarily utilize seagrass beds, mangroves, algal beds, and /or rocky reefs. The majority of surgeonfishes are exclusively found on coral reef habitat, an…
178024	ACTINOPTERYGII	PERCIFORMES	ACANTHURIDAE	Zebrasoma	desjardinii	Least Concern	Marine	[{'habitat': 'Outer Reef Channel', 'code': '9.8.1', 'season': None, 'suitability': 'Suitable', 'majorimportance': None}, {'habitat': 'Back Slope', 'code': '9.8.2', 'season': None, 'suitability': 'Suitable', 'majorimportance': None}, {'habitat': 'Foreslope (Outer Reef Slope)', 'code': '9.8.3', 'season': None, 'suitability': 'Suitable', 'majorimportance': None}, {'habitat': 'Lagoon', 'code': '9.8.4…	[]	There are no major threats known for this species.<br/><br/>Surgeonfishes show varying degrees of habitat preference and utilization of coral reef habitats, with some species spending the majority of their life stages on coral reef while others primarily utilize seagrass beds, mangroves, algal beds, and /or rocky reefs. The majority of surgeonfishes are exclusively found on coral reef habitat, an…
178025	ACTINOPTERYGII	PERCIFORMES	ACANTHURIDAE	Prionurus	maculatus	Least Concern	Marine	[{'habitat': 'Marine Neritic - Subtidal Rock and Rocky Reefs', 'code': '9.2', 'season': None, 'suitability': 'Suitable', 'majorimportance': None}, {'habitat': 'Outer Reef Channel', 'code': '9.8.1', 'season': None, 'suitability': 'Suitable', 'majorimportance': None}, {'habitat': 'Lagoon', 'code': '9.8.4', 'season': None, 'suitability': 'Suitable', 'majorimportance': None}]	[]	There are no major threats known for this species.<br/><br/>Surgeonfishes show varying degrees of habitat preference and utilization of coral reef habitats, with some species spending the majority of their life stages on coral reef while others primarily utilize seagrass beds, mangroves, algal beds, and /or rocky reefs. The majority of surgeonfishes are exclusively found on coral reef habitat, an…
178889	ACTINOPTERYGII	PERCIFORMES	TRIPTERYGIIDAE	Enneapterygius	rhabdotus	Least Concern	Marine	[{'habitat': 'Marine Intertidal - Rocky Shoreline', 'code': '12.1', 'season': None, 'suitability': 'Suitable', 'majorimportance': 'Yes'}, {'habitat': 'Marine Neritic - Subtidal Rock and Rocky Reefs', 'code': '9.2', 'season': None, 'suitability': 'Suitable', 'majorimportance': 'Yes'}]	[]	<p><a name="OLE_LINK2">There are no known threats to&#160;</a><em>Enneapterygius rhabdotus.</em></p>
178890	ACTINOPTERYGII	PERCIFORMES	TRIPTERYGIIDAE	Enneapterygius	cheni	Least Concern	Marine	[{'habitat': 'Marine Intertidal - Tidepools', 'code': '12.6', 'season': None, 'suitability': 'Suitable', 'majorimportance': 'Yes'}, {'habitat': 'Marine Neritic - Subtidal Rock and Rocky Reefs', 'code': '9.2', 'season': None, 'suitability': 'Suitable', 'majorimportance': 'Yes'}]	[]	<p><a name="OLE_LINK2">There are no known threats to <span style="font-style: italic;">Enneapterygius cheni.</span><br/></a></p>
178891	ACTINOPTERYGII	PERCIFORMES	TRIPTERYGIIDAE	Enneapterygius	clea	Least Concern	Marine	[{'habitat': 'Marine Neritic - Subtidal Rock and Rocky Reefs', 'code': '9.2', 'season': None, 'suitability': 'Suitable', 'majorimportance': 'Yes'}]	[]	<p><a name="OLE_LINK2">There are no known threats to <span style="font-style: italic;">Enneapterygius clea.</span><br/></a></p>
178892	ACTINOPTERYGII	PERCIFORMES	TRIPTERYGIIDAE	Ucla	xenogrammus	Least Concern	Marine	[{'habitat': 'Marine Neritic - Subtidal Rock and Rocky Reefs', 'code': '9.2', 'season': None, 'suitability': 'Suitable', 'majorimportance': 'Yes'}]	[]	There are no known threats to&#160;<em>Ucla xenogrammus.</em>
178893	ACTINOPTERYGII	PERCIFORMES	TRIPTERYGIIDAE	Enneapterygius	kosiensis	Least Concern	Marine	[{'habitat': 'Marine Neritic - Subtidal Rock and Rocky Reefs', 'code': '9.2', 'season': None, 'suitability': 'Suitable', 'majorimportance': 'Yes'}]	[]	<p><a name="OLE_LINK2">There are no known threats to&#160; <em>Enneapterygius kosiensis.</em></a></p>
178894	ACTINOPTERYGII	PERCIFORMES	TRIPTERYGIIDAE	Enneapterygius	flavoccipitis	Least Concern	Marine	[{'habitat': 'Marine Neritic - Subtidal Rock and Rocky Reefs', 'code': '9.2', 'season': None, 'suitability': 'Suitable', 'majorimportance': 'Yes'}, {'habitat': 'Foreslope (Outer Reef Slope)', 'code': '9.8.3', 'season': None, 'suitability': 'Suitable', 'majorimportance': 'Yes'}, {'habitat': 'Lagoon', 'code': '9.8.4', 'season': None, 'suitability': 'Suitable', 'majorimportance': 'Yes'}]	[]	<p><a name="OLE_LINK2">There are no known threats to <span style="font-style: italic;">Enneapterygius flavoccipitis.</span><br/></a></p>
178896	ACTINOPTERYGII	PERCIFORMES	TRIPTERYGIIDAE	Bellapiscis	lesleyae	Least Concern	Marine	[{'habitat': 'Marine Neritic - Subtidal Rock and Rocky Reefs', 'code': '9.2', 'season': None, 'suitability': 'Suitable', 'majorimportance': 'Yes'}]	[]	There are no known threats to <span style="font-style: italic;">Bellapiscis lesleyae.</span>
178897	ACTINOPTERYGII	PERCIFORMES	CLINIDAE	Heteroclinus	heptaeolus	Least Concern	Marine	[{'habitat': 'Marine Neritic - Macroalgal/Kelp', 'code': '9.7', 'season': None, 'suitability': 'Suitable', 'majorimportance': None}]	[]	<p>There are no known threats to this species.</p>
178898	ACTINOPTERYGII	PERCIFORMES	TRIPTERYGIIDAE	Enneanectes	pectoralis	Least Concern	Marine	[{'habitat': 'Marine Neritic - Subtidal Rock and Rocky Reefs', 'code': '9.2', 'season': None, 'suitability': 'Suitable', 'majorimportance': 'Yes'}]	[]	<a name="OLE_LINK2">There are no known major threats to <span style="font-style: italic;">Enneanectes pectoralis.</span><br/></a>
178899	ACTINOPTERYGII	PERCIFORMES	CLINIDAE	Heteroclinus	kuiteri	Least Concern	Marine	[{'habitat': 'Marine Neritic - Subtidal Rock and Rocky Reefs', 'code': '9.2', 'season': None, 'suitability': 'Suitable', 'majorimportance': None}, {'habitat': 'Marine Neritic - Macroalgal/Kelp', 'code': '9.7', 'season': None, 'suitability': 'Suitable', 'majorimportance': None}]	[]	<p>There are no known threats to this species.</p>
178900	ACTINOPTERYGII	PERCIFORMES	CLINIDAE	Myxodes	ornatus	Data Deficient	Marine	[{'habitat': 'Marine Neritic - Subtidal Rock and Rocky Reefs', 'code': '9.2', 'season': None, 'suitability': 'Unknown', 'majorimportance': None}]	[]	There are no major threats known for this species. Members of the Clinidae are viviparous, and therefore reproduce at a local, site-associated level, and have low dispersive ability, characteristics that can increase vulnerability to processes causing population decline (Baker 2009).
178901	ACTINOPTERYGII	PERCIFORMES	CLINIDAE	Heteroclinus	wilsoni	Least Concern	Marine	[{'habitat': 'Marine Intertidal - Rocky Shoreline', 'code': '12.1', 'season': None, 'suitability': 'Suitable', 'majorimportance': None}, {'habitat': 'Marine Neritic - Macroalgal/Kelp', 'code': '9.7', 'season': None, 'suitability': 'Suitable', 'majorimportance': None}]	[]	There are no known threats to this species.
178902	ACTINOPTERYGII	PERCIFORMES	CLINIDAE	Gibbonsia	montereyensis	Least Concern	Marine	[{'habitat': 'Marine Intertidal - Tidepools', 'code': '12.6', 'season': None, 'suitability': 'Suitable', 'majorimportance': None}, {'habitat': 'Marine Neritic - Macroalgal/Kelp', 'code': '9.7', 'season': None, 'suitability': 'Suitable', 'majorimportance': None}]	[]	There are no major threats known for this species.
178903	ACTINOPTERYGII	PERCIFORMES	CLINIDAE	Heteroclinus	adelaidae	Least Concern	Marine	[{'habitat': 'Marine Neritic - Estuaries', 'code': '9.10', 'season': None, 'suitability': 'Suitable', 'majorimportance': None}, {'habitat': 'Marine Neritic - Subtidal Rock and Rocky Reefs', 'code': '9.2', 'season': None, 'suitability': 'Suitable', 'majorimportance': None}, {'habitat': 'Marine Neritic - Subtidal Sandy-Mud', 'code': '9.5', 'season': None, 'suitability': 'Suitable', 'majorimportance…	[]	There are no known threats to this species.
178904	ACTINOPTERYGII	PERCIFORMES	TRIPTERYGIIDAE	Forsterygion	lapillum	Least Concern	Marine	[{'habitat': 'Marine Intertidal - Rocky Shoreline', 'code': '12.1', 'season': None, 'suitability': 'Suitable', 'majorimportance': 'Yes'}, {'habitat': 'Marine Neritic - Subtidal Rock and Rocky Reefs', 'code': '9.2', 'season': None, 'suitability': 'Suitable', 'majorimportance': 'Yes'}, {'habitat': 'Marine Neritic - Subtidal Loose Rock/pebble/gravel', 'code': '9.3', 'season': None, 'suitability': 'S…	[]	There are no known threats to&#160; <em>Forsterygion lapillum.</em>
178905	ACTINOPTERYGII	PERCIFORMES	TRIPTERYGIIDAE	Apopterygion	oculus	Least Concern	Marine	[{'habitat': 'Marine Neritic - Subtidal Loose Rock/pebble/gravel', 'code': '9.3', 'season': None, 'suitability': 'Suitable', 'majorimportance': 'Yes'}, {'habitat': 'Marine Neritic - Subtidal Sandy', 'code': '9.4', 'season': None, 'suitability': 'Suitable', 'majorimportance': 'Yes'}, {'habitat': 'Marine Neritic - Macroalgal/Kelp', 'code': '9.7', 'season': None, 'suitability': 'Suitable', 'majorimp…	[]	There are no known threats to <span style="font-style: italic;">Apopterygion oculus.</span>
178906	ACTINOPTERYGII	PERCIFORMES	CLINIDAE	Pavoclinus	myae	Least Concern	Marine	[{'habitat': 'Marine Neritic - Macroalgal/Kelp', 'code': '9.7', 'season': None, 'suitability': 'Suitable', 'majorimportance': None}]	[]	<p>There are no known threats to this species.</p>
178907	ACTINOPTERYGII	PERCIFORMES	TRIPTERYGIIDAE	Helcogramma	nesion	Least Concern	Marine	[{'habitat': 'Marine Intertidal - Rocky Shoreline', 'code': '12.1', 'season': None, 'suitability': 'Suitable', 'majorimportance': 'Yes'}, {'habitat': 'Marine Neritic - Subtidal Rock and Rocky Reefs', 'code': '9.2', 'season': None, 'suitability': 'Suitable', 'majorimportance': 'Yes'}]	[]	There are no known threats to&#160;<em>Helcogramma nesion</em>.
178908	ACTINOPTERYGII	PERCIFORMES	TRIPTERYGIIDAE	Enneapterygius	ornatus	Least Concern	Marine	[{'habitat': 'Marine Intertidal - Rocky Shoreline', 'code': '12.1', 'season': None, 'suitability': 'Suitable', 'majorimportance': 'Yes'}, {'habitat': 'Marine Intertidal - Tidepools', 'code': '12.6', 'season': None, 'suitability': 'Suitable', 'majorimportance': 'Yes'}]	[]	There are no known threats to&#160;<em>Enneapterygius ornatus</em>.
178909	ACTINOPTERYGII	PERCIFORMES	TRIPTERYGIIDAE	Helcogramma	vulcana	Least Concern	Marine	[{'habitat': 'Marine Neritic - Subtidal Rock and Rocky Reefs', 'code': '9.2', 'season': None, 'suitability': 'Suitable', 'majorimportance': 'Yes'}]	[]	<p><a name="OLE_LINK2">There are no known threats to&#160;</a><em>Helcogramma vulcana.</em></p>
178910	ACTINOPTERYGII	PERCIFORMES	TRIPTERYGIIDAE	Enneanectes	boehlkei	Least Concern	Marine	[{'habitat': 'Marine Neritic - Subtidal Rock and Rocky Reefs', 'code': '9.2', 'season': None, 'suitability': 'Suitable', 'majorimportance': 'Yes'}]	[]	There are no known major threats to <span style="font-style: italic;">Enneanectes boehlkei.&#160;</span>It&#160;has been identified as a prey item of the invasive Lionfish,&#160;<span style="font-style: italic;">Pterois volitans</span>&#160;(Valdez-Moreno et al. 2012).
178911	ACTINOPTERYGII	PERCIFORMES	TRIPTERYGIIDAE	Enneapterygius	randalli	Least Concern	Marine	[{'habitat': 'Marine Intertidal - Tidepools', 'code': '12.6', 'season': None, 'suitability': 'Suitable', 'majorimportance': 'Yes'}]	[]	<p><a name="OLE_LINK2">There are no known threats to <em>Enneapterygius randalli</em>. The current population on Rapa is less than 200, and the area is inaccessible and undeveloped.<br/></a></p>
178912	ACTINOPTERYGII	PERCIFORMES	TRIPTERYGIIDAE	Helcogramma	ellioti	Least Concern	Marine	[{'habitat': 'Marine Neritic - Subtidal Rock and Rocky Reefs', 'code': '9.2', 'season': None, 'suitability': 'Suitable', 'majorimportance': 'Yes'}]	[]	There are no known threats to <em>Heclogramma ellioti.</em>
178913	ACTINOPTERYGII	PERCIFORMES	TRIPTERYGIIDAE	Enneapterygius	fuscoventer	Least Concern	Marine	[{'habitat': 'Marine Neritic - Subtidal Rock and Rocky Reefs', 'code': '9.2', 'season': None, 'suitability': 'Suitable', 'majorimportance': 'Yes'}]	[]	There are no known threats to <span style="font-style: italic;">Enneapterygius fuscoventer.</span>
178914	ACTINOPTERYGII	PERCIFORMES	TRIPTERYGIIDAE	Acanthanectes	rufus	Least Concern	Marine	[{'habitat': 'Marine Neritic - Macroalgal/Kelp', 'code': '9.7', 'season': None, 'suitability': 'Suitable', 'majorimportance': 'No'}]	[]	There are no known threats to <span style="font-style: italic;">Acanthanectes rufus.<br/></span>
178915	ACTINOPTERYGII	PERCIFORMES	TRIPTERYGIIDAE	Enneapterygius	similis	Least Concern	Marine	[{'habitat': 'Marine Intertidal - Tidepools', 'code': '12.6', 'season': None, 'suitability': 'Suitable', 'majorimportance': 'Yes'}, {'habitat': 'Marine Neritic - Subtidal Rock and Rocky Reefs', 'code': '9.2', 'season': None, 'suitability': 'Suitable', 'majorimportance': 'Yes'}]	[]	There are no known threats to <em>Enneapterygius similis.</em>
178916	ACTINOPTERYGII	PERCIFORMES	TRIPTERYGIIDAE	Helcogramma	alkamr	Least Concern	Marine	[{'habitat': 'Foreslope (Outer Reef Slope)', 'code': '9.8.3', 'season': None, 'suitability': 'Suitable', 'majorimportance': 'Yes'}, {'habitat': 'Inter-Reef Soft Substrate', 'code': '9.8.5', 'season': None, 'suitability': 'Suitable', 'majorimportance': 'Yes'}, {'habitat': 'Inter-Reef Rubble Substrate', 'code': '9.8.6', 'season': None, 'suitability': 'Suitable', 'majorimportance': 'Yes'}]	[]	There are no known threats to&#160; <em>Helcogramma alkamr</em>.
178917	ACTINOPTERYGII	PERCIFORMES	CLINIDAE	Gibbonsia	metzi	Least Concern	Marine	[{'habitat': 'Marine Intertidal - Tidepools', 'code': '12.6', 'season': None, 'suitability': 'Suitable', 'majorimportance': None}, {'habitat': 'Marine Neritic - Subtidal Rock and Rocky Reefs', 'code': '9.2', 'season': None, 'suitability': 'Suitable', 'majorimportance': None}, {'habitat': 'Marine Neritic - Macroalgal/Kelp', 'code': '9.7', 'season': None, 'suitability': 'Suitable', 'majorimportance…	[]	There are no major threats known for this species.
178918	ACTINOPTERYGII	PERCIFORMES	CLINIDAE	Clinus	agilis	Least Concern	Marine	[{'habitat': 'Marine Intertidal - Tidepools', 'code': '12.6', 'season': None, 'suitability': 'Suitable', 'majorimportance': None}, {'habitat': 'Marine Neritic - Macroalgal/Kelp', 'code': '9.7', 'season': None, 'suitability': 'Suitable', 'majorimportance': None}]	[]	There are no known threats to this species.
178919	ACTINOPTERYGII	PERCIFORMES	TRIPTERYGIIDAE	Enneanectes	atrorus	Least Concern	Marine	[{'habitat': 'Marine Neritic - Subtidal Rock and Rocky Reefs', 'code': '9.2', 'season': None, 'suitability': 'Suitable', 'majorimportance': 'Yes'}]	[]	<p><a name="OLE_LINK2">There are no known major threats to <span style="font-style: italic;">Enneanectes atrorus.</span><br/></a></p>
178920	ACTINOPTERYGII	PERCIFORMES	TRIPTERYGIIDAE	Enneapterygius	atriceps	Least Concern	Marine	[{'habitat': 'Marine Neritic - Subtidal Rock and Rocky Reefs', 'code': '9.2', 'season': None, 'suitability': 'Suitable', 'majorimportance': 'Yes'}, {'habitat': 'Marine Neritic - Subtidal Loose Rock/pebble/gravel', 'code': '9.3', 'season': None, 'suitability': 'Suitable', 'majorimportance': 'Yes'}]	[]	<p><a name="OLE_LINK2">There are no known threats to <span style="font-style: italic;">Enneapterygius atriceps.</span><br/></a></p>
178921	ACTINOPTERYGII	PERCIFORMES	TRIPTERYGIIDAE	Helcogramma	randalli	Least Concern	Marine	[{'habitat': 'Marine Intertidal - Rocky Shoreline', 'code': '12.1', 'season': None, 'suitability': 'Suitable', 'majorimportance': 'Yes'}, {'habitat': 'Marine Neritic - Subtidal Rock and Rocky Reefs', 'code': '9.2', 'season': None, 'suitability': 'Suitable', 'majorimportance': 'Yes'}]	[{'code': '1.1', 'score': 'Unknown', 'severity': 'Unknown', 'timing': 'Ongoing', 'title': 'Housing & urban areas', 'invasive': None, 'scope': 'Unknown'}, {'code': '1.2', 'score': 'Unknown', 'severity': 'Unknown', 'timing': 'Ongoing', 'title': 'Commercial & industrial areas', 'invasive': None, 'scope': 'Unknown'}, {'code': '1.3', 'score': 'Unknown', 'severity': 'Unknown', 'timing': 'Ongoing', 'tit…	There are no known major threats to the global population of <em>Helcogramma randalli</em>, but it may be impacted by coastal development in some parts of its range.
178922	ACTINOPTERYGII	PERCIFORMES	CLINIDAE	Pavoclinus	litorafontis	Least Concern	Marine	[{'habitat': 'Marine Neritic - Subtidal Rock and Rocky Reefs', 'code': '9.2', 'season': None, 'suitability': 'Suitable', 'majorimportance': None}, {'habitat': 'Marine Neritic - Macroalgal/Kelp', 'code': '9.7', 'season': None, 'suitability': 'Suitable', 'majorimportance': None}]	[]	<p> There are no major threats known for this species. Members of the Clinidae are site-associated in coastal areas of seagrass and macroalgae, and processes which damage such habitats may adversely affect populations of Clinid species. Members of the family are viviparous, and therefore reproduce at a local, site-associated level, and have low dispersive ability, characteristics that can increas…
178923	ACTINOPTERYGII	PERCIFORMES	CLINIDAE	Ophiclinops	pardalis	Data Deficient	Marine	[{'habitat': 'Marine Intertidal - Mangrove Submerged Roots', 'code': '12.7', 'season': None, 'suitability': 'Suitable', 'majorimportance': None}, {'habitat': 'Marine Neritic - Subtidal Rock and Rocky Reefs', 'code': '9.2', 'season': None, 'suitability': 'Suitable', 'majorimportance': None}, {'habitat': 'Marine Neritic - Macroalgal/Kelp', 'code': '9.7', 'season': None, 'suitability': 'Suitable', '…	[{'code': '1.1', 'score': 'Unknown', 'severity': 'Unknown', 'timing': 'Ongoing', 'title': 'Housing & urban areas', 'invasive': None, 'scope': 'Unknown'}, {'code': '1.2', 'score': 'Unknown', 'severity': 'Unknown', 'timing': 'Ongoing', 'title': 'Commercial & industrial areas', 'invasive': None, 'scope': 'Unknown'}, {'code': '1.3', 'score': 'Unknown', 'severity': 'Unknown', 'timing': 'Ongoing', 'tit…	<span style="font-style: italic;">Ophiclinops pardalis</span> occurs in estuarine areas and shallow bays, in seagrass litter/mats, and any processes or developments that degrade estuaries may also adversely affect this species.&#160; In particular, seagrass degradation is an ongoing concern in northern Spencer Gulf&#160; and north-eastern Gulf St Vincent (Baker 2004, Gillanders <span style="font-…
178924	ACTINOPTERYGII	PERCIFORMES	TRIPTERYGIIDAE	Springerichthys	bapturus	Least Concern	Marine	[{'habitat': 'Marine Intertidal - Rocky Shoreline', 'code': '12.1', 'season': None, 'suitability': 'Suitable', 'majorimportance': 'Yes'}, {'habitat': 'Marine Intertidal - Tidepools', 'code': '12.6', 'season': None, 'suitability': 'Suitable', 'majorimportance': 'Yes'}]	[]	<p><a name="OLE_LINK2">There are no known threats to&#160;</a><em>Springerichthys bapturus.</em></p>
178925	ACTINOPTERYGII	PERCIFORMES	CLINIDAE	Gibbonsia	elegans	Least Concern	Marine	[{'habitat': 'Marine Neritic - Subtidal Rock and Rocky Reefs', 'code': '9.2', 'season': None, 'suitability': 'Suitable', 'majorimportance': None}, {'habitat': 'Marine Neritic - Macroalgal/Kelp', 'code': '9.7', 'season': None, 'suitability': 'Suitable', 'majorimportance': None}, {'habitat': 'Marine Neritic - Seagrass (Submerged)', 'code': '9.9', 'season': None, 'suitability': 'Suitable', 'majorimp…	[]	There are no major threats known for this species.
178926	ACTINOPTERYGII	PERCIFORMES	TRIPTERYGIIDAE	Helcogramma	kranos	Least Concern	Marine	[{'habitat': 'Marine Intertidal - Rocky Shoreline', 'code': '12.1', 'season': None, 'suitability': 'Suitable', 'majorimportance': 'Yes'}]	[{'code': '1.1', 'score': 'Unknown', 'severity': 'Unknown', 'timing': 'Ongoing', 'title': 'Housing & urban areas', 'invasive': None, 'scope': 'Unknown'}, {'code': '1.2', 'score': 'Unknown', 'severity': 'Unknown', 'timing': 'Ongoing', 'title': 'Commercial & industrial areas', 'invasive': None, 'scope': 'Unknown'}, {'code': '1.3', 'score': 'Unknown', 'severity': 'Unknown', 'timing': 'Ongoing', 'tit…	<p><a name="OLE_LINK2">There are no known threats to&#160;<em>Helcogramma kranos</em>, but it&#160;may be vulnerable to coastal development in some parts of its range.<br/></a></p>
178927	ACTINOPTERYGII	PERCIFORMES	CLINIDAE	Pavoclinus	mentalis	Least Concern	Marine	[{'habitat': 'Marine Neritic - Macroalgal/Kelp', 'code': '9.7', 'season': None, 'suitability': 'Suitable', 'majorimportance': None}]	[]	<p>There are no known threats to this species.</p>
178928	ACTINOPTERYGII	PERCIFORMES	TRIPTERYGIIDAE	Enneapterygius	signicauda	Least Concern	Marine	[{'habitat': 'Marine Intertidal - Rocky Shoreline', 'code': '12.1', 'season': None, 'suitability': 'Suitable', 'majorimportance': 'Yes'}, {'habitat': 'Marine Neritic - Subtidal Rock and Rocky Reefs', 'code': '9.2', 'season': None, 'suitability': 'Suitable', 'majorimportance': 'Yes'}]	[]	<p><a name="OLE_LINK2">There are no known threats to&#160; <em>Enneapterygius signicauda.</em></a></p>
178929	ACTINOPTERYGII	PERCIFORMES	CLINIDAE	Ophiclinus	ningulus	Least Concern	Marine	[{'habitat': 'Marine Intertidal - Rocky Shoreline', 'code': '12.1', 'season': None, 'suitability': 'Suitable', 'majorimportance': None}, {'habitat': 'Marine Neritic - Subtidal Rock and Rocky Reefs', 'code': '9.2', 'season': None, 'suitability': 'Suitable', 'majorimportance': None}]	[{'code': '1.2', 'score': 'Unknown', 'severity': 'Unknown', 'timing': 'Ongoing', 'title': 'Commercial & industrial areas', 'invasive': None, 'scope': 'Unknown'}, {'code': '1.3', 'score': 'Unknown', 'severity': 'Unknown', 'timing': 'Ongoing', 'title': 'Tourism & recreation areas', 'invasive': None, 'scope': 'Unknown'}]	<span style="font-style: italic;">Ophiclinus ningulus</span> is site-associated in shallow coastal habitats (mainly with macroalgae-covered reefs), and processes which damage such habitats may adversely affect populations of Clinid species. Examples might include physical disturbance to habitat and siltation (from dredging, etc.), also sediment- and effluent-induced dieback of macroalgae, however…
178930	ACTINOPTERYGII	PERCIFORMES	CLINIDAE	Heteroclinus	macrophthalmus	Least Concern	Marine	[{'habitat': 'Marine Neritic - Macroalgal/Kelp', 'code': '9.7', 'season': None, 'suitability': 'Suitable', 'majorimportance': None}, {'habitat': 'Marine Neritic - Seagrass (Submerged)', 'code': '9.9', 'season': None, 'suitability': 'Suitable', 'majorimportance': None}]	[]	<p>There are no known threats to this species.</p>
178931	ACTINOPTERYGII	PERCIFORMES	CLINIDAE	Clinus	helenae	Least Concern	Marine	[{'habitat': 'Marine Neritic - Macroalgal/Kelp', 'code': '9.7', 'season': None, 'suitability': 'Unknown', 'majorimportance': None}]	[]	Its is not known if there are any threats to this species.
178932	ACTINOPTERYGII	PERCIFORMES	TRIPTERYGIIDAE	Enneapterygius	tutuilae	Least Concern	Marine	[{'habitat': 'Marine Intertidal - Rocky Shoreline', 'code': '12.1', 'season': None, 'suitability': 'Suitable', 'majorimportance': 'Yes'}, {'habitat': 'Marine Intertidal - Tidepools', 'code': '12.6', 'season': None, 'suitability': 'Suitable', 'majorimportance': 'Yes'}, {'habitat': 'Marine Neritic - Subtidal Rock and Rocky Reefs', 'code': '9.2', 'season': None, 'suitability': 'Suitable', 'majorimpo…	[]	<p><a name="OLE_LINK2">There are no known threats to <em>Enneapterygius tutuilae</em>.</a></p>
178933	ACTINOPTERYGII	PERCIFORMES	CLINIDAE	Blennophis	striatus	Least Concern	Marine	[{'habitat': 'Marine Intertidal - Rocky Shoreline', 'code': '12.1', 'season': None, 'suitability': 'Suitable', 'majorimportance': None}, {'habitat': 'Marine Intertidal - Tidepools', 'code': '12.6', 'season': None, 'suitability': 'Suitable', 'majorimportance': None}]	[]	There are no known threats to this species.
178934	ACTINOPTERYGII	PERCIFORMES	TRIPTERYGIIDAE	Enneapterygius	kermadecensis	Least Concern	Marine	[{'habitat': 'Marine Intertidal - Rocky Shoreline', 'code': '12.1', 'season': None, 'suitability': 'Suitable', 'majorimportance': 'Yes'}, {'habitat': 'Marine Neritic - Subtidal Rock and Rocky Reefs', 'code': '9.2', 'season': None, 'suitability': 'Suitable', 'majorimportance': 'Yes'}]	[]	There are no known threats to&#160;<em>Enneapterygius kermadecensis.</em>
178935	ACTINOPTERYGII	PERCIFORMES	CLINIDAE	Heteroclinus	eckloniae	Least Concern	Marine	[{'habitat': 'Marine Neritic - Macroalgal/Kelp', 'code': '9.7', 'season': None, 'suitability': 'Suitable', 'majorimportance': None}]	[]	<p>There are no known threats to this species.<br/></p>
178936	ACTINOPTERYGII	PERCIFORMES	CLINIDAE	Heteroclinus	puellarum	Least Concern	Marine	[{'habitat': 'Marine Neritic - Subtidal Rock and Rocky Reefs', 'code': '9.2', 'season': None, 'suitability': 'Suitable', 'majorimportance': None}, {'habitat': 'Marine Neritic - Macroalgal/Kelp', 'code': '9.7', 'season': None, 'suitability': 'Suitable', 'majorimportance': None}]	[]	There are no known threats to this species.
178937	ACTINOPTERYGII	PERCIFORMES	TRIPTERYGIIDAE	Enneapterygius	niger	Least Concern	Marine	[{'habitat': 'Marine Intertidal - Rocky Shoreline', 'code': '12.1', 'season': None, 'suitability': 'Suitable', 'majorimportance': 'Yes'}, {'habitat': 'Marine Intertidal - Tidepools', 'code': '12.6', 'season': None, 'suitability': 'Suitable', 'majorimportance': 'Yes'}, {'habitat': 'Marine Neritic - Subtidal Rock and Rocky Reefs', 'code': '9.2', 'season': None, 'suitability': 'Suitable', 'majorimpo…	[]	<p><a name="OLE_LINK2">There are no known threats to&#160;<em>Enneapterygius niger</em>.</a></p>
178938	ACTINOPTERYGII	PERCIFORMES	TRIPTERYGIIDAE	Enneanectes	smithi	Vulnerable	Marine	[{'habitat': 'Marine Intertidal - Rocky Shoreline', 'code': '12.1', 'season': None, 'suitability': 'Suitable', 'majorimportance': 'Yes'}, {'habitat': 'Marine Intertidal - Tidepools', 'code': '12.6', 'season': None, 'suitability': 'Suitable', 'majorimportance': 'Yes'}, {'habitat': 'Marine Neritic - Subtidal Rock and Rocky Reefs', 'code': '9.2', 'season': None, 'suitability': 'Suitable', 'majorimpo…	[{'code': '6.2', 'score': 'Low Impact: 3', 'severity': None, 'timing': 'Ongoing', 'title': 'War, civil unrest & military exercises', 'invasive': None, 'scope': None}, {'code': '7.3', 'score': 'Low Impact: 3', 'severity': None, 'timing': 'Ongoing', 'title': 'Other ecosystem modifications', 'invasive': None, 'scope': None}, {'code': '8.1', 'score': 'Unknown', 'severity': 'Unknown', 'timing': 'Futur…	<p><a name="OLE_LINK2">It is not known how human activities in the area currently affect this species. However, potential threats to <em>Enneanectes smithi</em> include coastal construction activities, including the construction of a salt water desalination system (Campos <em>et al</em>. 2007). The area is also subject to military research activities (Alverez <em>et al</em>. 2000), has an active …
178939	ACTINOPTERYGII	PERCIFORMES	TRIPTERYGIIDAE	Trinorfolkia	cristata	Least Concern	Marine	[{'habitat': 'Marine Intertidal - Rocky Shoreline', 'code': '12.1', 'season': None, 'suitability': 'Suitable', 'majorimportance': 'Yes'}, {'habitat': 'Marine Neritic - Subtidal Rock and Rocky Reefs', 'code': '9.2', 'season': None, 'suitability': 'Suitable', 'majorimportance': 'Yes'}]	[]	<p><a name="OLE_LINK2">There are no known threats to&#160;</a><em>Trinorfolkia cristata.</em></p>
178940	ACTINOPTERYGII	PERCIFORMES	TRIPTERYGIIDAE	Enneapterygius	hollemani	Least Concern	Marine	[{'habitat': 'Marine Intertidal - Rocky Shoreline', 'code': '12.1', 'season': None, 'suitability': 'Suitable', 'majorimportance': 'Yes'}, {'habitat': 'Marine Intertidal - Tidepools', 'code': '12.6', 'season': None, 'suitability': 'Suitable', 'majorimportance': 'Yes'}]	[]	There are no known threats to&#160;<em>Enneapterygius hollemani</em>.
178941	ACTINOPTERYGII	PERCIFORMES	CLINIDAE	Cirrhibarbis	capensis	Least Concern	Marine	[{'habitat': 'Marine Neritic - Subtidal Rock and Rocky Reefs', 'code': '9.2', 'season': None, 'suitability': 'Suitable', 'majorimportance': None}, {'habitat': 'Marine Neritic - Macroalgal/Kelp', 'code': '9.7', 'season': None, 'suitability': 'Suitable', 'majorimportance': None}]	[]	There are no known threats to this species.
178942	ACTINOPTERYGII	PERCIFORMES	CLINIDAE	Sticharium	dorsale	Least Concern	Marine	[{'habitat': 'Marine Intertidal - Tidepools', 'code': '12.6', 'season': None, 'suitability': 'Suitable', 'majorimportance': None}, {'habitat': 'Marine Neritic - Estuaries', 'code': '9.10', 'season': None, 'suitability': 'Suitable', 'majorimportance': None}, {'habitat': 'Marine Neritic - Subtidal Rock and Rocky Reefs', 'code': '9.2', 'season': None, 'suitability': 'Suitable', 'majorimportance': No…	[{'code': '1.2', 'score': 'Unknown', 'severity': 'Unknown', 'timing': 'Ongoing', 'title': 'Commercial & industrial areas', 'invasive': None, 'scope': 'Unknown'}, {'code': '1.3', 'score': 'Unknown', 'severity': 'Unknown', 'timing': 'Ongoing', 'title': 'Tourism & recreation areas', 'invasive': None, 'scope': 'Unknown'}, {'code': '9.1', 'score': 'Unknown', 'severity': 'Unknown', 'timing': 'Ongoing',…	<p>There are no known threats to this species. <span style="font-style: italic;">Sticharium dorsale </span>has been recorded over a narrow depth range (0-8) in sandy habitats. It is possible that dredging or other habitat disturbance of nearshore areas may impact localised populations in some parts of the range. Other habitats (seagrass beds, estuaries) are also subject to habitat degradation. Ho…
178943	ACTINOPTERYGII	PERCIFORMES	CLINIDAE	Pavoclinus	laurentii	Least Concern	Marine	[{'habitat': 'Marine Intertidal - Tidepools', 'code': '12.6', 'season': None, 'suitability': 'Suitable', 'majorimportance': None}]	[]	<p>There are no known threats to this species.</p>
178944	ACTINOPTERYGII	PERCIFORMES	TRIPTERYGIIDAE	Matanui	bathytaton	Least Concern	Marine	[]	[]	There are no known threats to&#160;<em>Matanui bathytaton.</em>
178945	ACTINOPTERYGII	PERCIFORMES	CLINIDAE	Heteroclinus	johnstoni	Least Concern	Marine	[{'habitat': 'Marine Neritic - Subtidal Rock and Rocky Reefs', 'code': '9.2', 'season': None, 'suitability': 'Suitable', 'majorimportance': None}, {'habitat': 'Marine Neritic - Subtidal Sandy', 'code': '9.4', 'season': None, 'suitability': 'Suitable', 'majorimportance': None}]	[]	<p>There are no known threats to this species.</p>
178947	ACTINOPTERYGII	PERCIFORMES	TRIPTERYGIIDAE	Lepidoblennius	marmoratus	Least Concern	Marine	[{'habitat': 'Marine Intertidal - Rocky Shoreline', 'code': '12.1', 'season': None, 'suitability': 'Suitable', 'majorimportance': 'Yes'}, {'habitat': 'Marine Neritic - Subtidal Rock and Rocky Reefs', 'code': '9.2', 'season': None, 'suitability': 'Suitable', 'majorimportance': 'Yes'}]	[]	<p><a name="OLE_LINK2">There are no known threats to&#160;</a><em>Lepidoblennius marmoratus.</em></p>
178948	ACTINOPTERYGII	PERCIFORMES	TRIPTERYGIIDAE	Bellapiscis	medius	Least Concern	Marine	[{'habitat': 'Marine Intertidal - Rocky Shoreline', 'code': '12.1', 'season': None, 'suitability': 'Suitable', 'majorimportance': 'Yes'}]	[]	There are no known threats to <span style="font-style: italic;">Bellapiscis medius.</span>
178949	ACTINOPTERYGII	PERCIFORMES	TRIPTERYGIIDAE	Helcogramma	fuscipectoris	Least Concern	Marine	[{'habitat': 'Marine Intertidal - Rocky Shoreline', 'code': '12.1', 'season': None, 'suitability': 'Suitable', 'majorimportance': 'Yes'}, {'habitat': 'Marine Neritic - Subtidal Rock and Rocky Reefs', 'code': '9.2', 'season': None, 'suitability': 'Suitable', 'majorimportance': 'Yes'}]	[]	<p><a name="OLE_LINK2">There are no known threats to&#160;<em>Heclogramma fuscipectoris</em>.</a></p>
178950	ACTINOPTERYGII	PERCIFORMES	TRIPTERYGIIDAE	Enneapterygius	bahasa	Least Concern	Marine	[{'habitat': 'Marine Neritic - Subtidal Rock and Rocky Reefs', 'code': '9.2', 'season': None, 'suitability': 'Suitable', 'majorimportance': 'Yes'}]	[]	There are no known threats to <span style="font-style: italic;">Enneapterygius bahasa.</span>
178951	ACTINOPTERYGII	PERCIFORMES	TRIPTERYGIIDAE	Springerichthys	kulbickii	Least Concern	Marine	[{'habitat': 'Marine Neritic - Subtidal Rock and Rocky Reefs', 'code': '9.2', 'season': None, 'suitability': 'Suitable', 'majorimportance': 'Yes'}]	[]	<p><a name="OLE_LINK2">There are no known threats to&#160;</a><em>Springerichthys kulbickii.</em></p>
178952	ACTINOPTERYGII	PERCIFORMES	CLINIDAE	Clinus	woodi	Least Concern	Marine	[{'habitat': 'Marine Neritic - Macroalgal/Kelp', 'code': '9.7', 'season': None, 'suitability': 'Suitable', 'majorimportance': None}]	[]	There are no major threats known to this species.
178953	ACTINOPTERYGII	PERCIFORMES	CLINIDAE	Blennioclinus	brachycephalus	Least Concern	Marine	[{'habitat': 'Marine Intertidal - Tidepools', 'code': '12.6', 'season': None, 'suitability': 'Suitable', 'majorimportance': None}, {'habitat': 'Marine Neritic - Subtidal Loose Rock/pebble/gravel', 'code': '9.3', 'season': None, 'suitability': 'Suitable', 'majorimportance': None}, {'habitat': 'Marine Neritic - Macroalgal/Kelp', 'code': '9.7', 'season': None, 'suitability': 'Suitable', 'majorimport…	[]	There are no threats known to this species.
178954	ACTINOPTERYGII	PERCIFORMES	TRIPTERYGIIDAE	Enneapterygius	sheni	Data Deficient	Marine	[{'habitat': 'Marine Neritic - Subtidal Rock and Rocky Reefs', 'code': '9.2', 'season': None, 'suitability': 'Suitable', 'majorimportance': 'Yes'}]	[{'code': '1.1', 'score': 'Unknown', 'severity': 'Unknown', 'timing': 'Future', 'title': 'Housing & urban areas', 'invasive': None, 'scope': 'Unknown'}, {'code': '1.2', 'score': 'Unknown', 'severity': 'Unknown', 'timing': 'Future', 'title': 'Commercial & industrial areas', 'invasive': None, 'scope': 'Unknown'}, {'code': '1.3', 'score': 'Unknown', 'severity': 'Unknown', 'timing': 'Future', 'title'…	<p><a name="OLE_LINK2">There are no known threats to&#160; <em>Enneapterygius sheni</em>, although coastal development may be a future plausible threat given its very small known range.<br/></a></p>
178956	ACTINOPTERYGII	PERCIFORMES	TRIPTERYGIIDAE	Norfolkia	leeuwin	Least Concern	Marine	[{'habitat': 'Marine Neritic - Subtidal Rock and Rocky Reefs', 'code': '9.2', 'season': None, 'suitability': 'Suitable', 'majorimportance': 'Yes'}]	[]	<p><a name="OLE_LINK2">There are no known threats to&#160;</a><em>Norfolkia leeuwin.</em></p>
178957	ACTINOPTERYGII	PERCIFORMES	TRIPTERYGIIDAE	Enneapterygius	pyramis	Least Concern	Marine	[{'habitat': 'Marine Neritic - Subtidal Rock and Rocky Reefs', 'code': '9.2', 'season': None, 'suitability': 'Suitable', 'majorimportance': 'Yes'}]	[]	<p><a name="OLE_LINK2">There are no known threats to <em>Enneapterygius pyramis</em>.</a></p>
178958	ACTINOPTERYGII	PERCIFORMES	TRIPTERYGIIDAE	Enneapterygius	ventermaculus	Least Concern	Marine	[{'habitat': 'Inter-Reef Rubble Substrate', 'code': '9.8.6', 'season': None, 'suitability': 'Suitable', 'majorimportance': 'Yes'}]	[{'code': '1.1', 'score': 'Low Impact: 3', 'severity': None, 'timing': 'Ongoing', 'title': 'Housing & urban areas', 'invasive': None, 'scope': None}, {'code': '1.2', 'score': 'Low Impact: 3', 'severity': None, 'timing': 'Ongoing', 'title': 'Commercial & industrial areas', 'invasive': None, 'scope': None}, {'code': '1.3', 'score': 'Low Impact: 3', 'severity': None, 'timing': 'Ongoing', 'title': 'T…	<p>Substantial sea bottom dredging, resulting in changes of water flow and sedimentation rates, for industrial, infrastructure-based, and residential and tourism development along the coast have caused deterioration in most benthic habitats (Sheppard&#160;<em>et al.</em>&#160;2010). For example, large number of desalination plants on the coast of the Persian Gulf leads to localized increases in t…
178959	ACTINOPTERYGII	PERCIFORMES	TRIPTERYGIIDAE	Enneapterygius	melanospilus	Least Concern	Marine	[{'habitat': 'Marine Intertidal - Rocky Shoreline', 'code': '12.1', 'season': None, 'suitability': 'Suitable', 'majorimportance': 'Yes'}, {'habitat': 'Marine Neritic - Subtidal Rock and Rocky Reefs', 'code': '9.2', 'season': None, 'suitability': 'Suitable', 'majorimportance': 'Yes'}]	[]	<p><a name="OLE_LINK2">There are no known threats to <em>Enneapterygius melanospilus</em>.</a></p>
178960	ACTINOPTERYGII	PERCIFORMES	TRIPTERYGIIDAE	Trianectes	bucephalus	Least Concern	Marine	[{'habitat': 'Marine Intertidal - Rocky Shoreline', 'code': '12.1', 'season': None, 'suitability': 'Suitable', 'majorimportance': 'Yes'}, {'habitat': 'Marine Intertidal - Tidepools', 'code': '12.6', 'season': None, 'suitability': 'Suitable', 'majorimportance': 'Yes'}]	[]	There are no known threats to&#160;<em>Trianectes bucephalus.</em>
178961	ACTINOPTERYGII	PERCIFORMES	TRIPTERYGIIDAE	Gilloblennius	abditus	Least Concern	Marine	[{'habitat': 'Marine Intertidal - Rocky Shoreline', 'code': '12.1', 'season': None, 'suitability': 'Suitable', 'majorimportance': 'Yes'}, {'habitat': 'Marine Intertidal - Tidepools', 'code': '12.6', 'season': None, 'suitability': 'Suitable', 'majorimportance': 'Yes'}, {'habitat': 'Marine Neritic - Subtidal Rock and Rocky Reefs', 'code': '9.2', 'season': None, 'suitability': 'Suitable', 'majorimpo…	[]	There are no known threats to <em>Gilloblennius abditus</em>.
178962	ACTINOPTERYGII	PERCIFORMES	CLINIDAE	Clinus	venustris	Least Concern	Marine	[{'habitat': 'Marine Intertidal - Tidepools', 'code': '12.6', 'season': None, 'suitability': 'Suitable', 'majorimportance': None}, {'habitat': 'Marine Neritic - Macroalgal/Kelp', 'code': '9.7', 'season': None, 'suitability': 'Suitable', 'majorimportance': None}]	[]	There are no known threats to this species.
178963	ACTINOPTERYGII	PERCIFORMES	TRIPTERYGIIDAE	Enneapterygius	triserialis	Least Concern	Marine	[{'habitat': 'Marine Neritic - Subtidal Rock and Rocky Reefs', 'code': '9.2', 'season': None, 'suitability': 'Suitable', 'majorimportance': 'Yes'}]	[]	<p><a name="OLE_LINK2">There are no known threats to&#160; <em>Enneapterygius triserialis</em>.</a></p>
178965	ACTINOPTERYGII	PERCIFORMES	TRIPTERYGIIDAE	Notoclinops	segmentatus	Least Concern	Marine	[{'habitat': 'Marine Intertidal - Tidepools', 'code': '12.6', 'season': None, 'suitability': 'Suitable', 'majorimportance': 'Yes'}, {'habitat': 'Marine Neritic - Subtidal Rock and Rocky Reefs', 'code': '9.2', 'season': None, 'suitability': 'Suitable', 'majorimportance': 'Yes'}]	[]	There are no known threats to&#160;<em>Notoclinops segmentatus.</em>
178966	ACTINOPTERYGII	PERCIFORMES	TRIPTERYGIIDAE	Helcogramma	solorensis	Data Deficient	Marine	[{'habitat': 'Marine Neritic - Subtidal Loose Rock/pebble/gravel', 'code': '9.3', 'season': None, 'suitability': 'Suitable', 'majorimportance': 'Yes'}]	[]	It is not known if the are any threats to&#160;<em>Helcogramma solorensis.</em>
178967	ACTINOPTERYGII	PERCIFORMES	TRIPTERYGIIDAE	Enneapterygius	obscurus	Least Concern	Marine	[{'habitat': 'Lagoon', 'code': '9.8.4', 'season': None, 'suitability': 'Suitable', 'majorimportance': 'Yes'}, {'habitat': 'Inter-Reef Rubble Substrate', 'code': '9.8.6', 'season': None, 'suitability': 'Suitable', 'majorimportance': 'Yes'}]	[]	There are no known threats to&#160;<em>Enneapterygius obscurus</em>.
178968	ACTINOPTERYGII	PERCIFORMES	CLINIDAE	Pavoclinus	smalei	Least Concern	Marine	[{'habitat': 'Marine Neritic - Subtidal Sandy', 'code': '9.4', 'season': None, 'suitability': 'Suitable', 'majorimportance': None}]	[]	<p>There are no known threats to this species.</p>
178969	ACTINOPTERYGII	PERCIFORMES	TRIPTERYGIIDAE	Forsterygion	maryannae	Least Concern	Marine	[{'habitat': 'Marine Neritic - Subtidal Rock and Rocky Reefs', 'code': '9.2', 'season': None, 'suitability': 'Suitable', 'majorimportance': 'Yes'}]	[]	There are no known threats to&#160;<em>Forsterygion maryannae.</em>
178970	ACTINOPTERYGII	PERCIFORMES	TRIPTERYGIIDAE	Notoclinus	fenestratus	Least Concern	Marine	[{'habitat': 'Marine Neritic - Macroalgal/Kelp', 'code': '9.7', 'season': None, 'suitability': 'Suitable', 'majorimportance': 'Yes'}]	[]	There are no known threats to <em>Notoclinus fenestratus.</em>
178971	ACTINOPTERYGII	PERCIFORMES	CLINIDAE	Clinus	berrisfordi	Least Concern	Marine	[{'habitat': 'Marine Intertidal - Tidepools', 'code': '12.6', 'season': None, 'suitability': 'Suitable', 'majorimportance': None}, {'habitat': 'Marine Neritic - Macroalgal/Kelp', 'code': '9.7', 'season': None, 'suitability': 'Suitable', 'majorimportance': None}]	[]	There are no known threats to this species.
178972	ACTINOPTERYGII	PERCIFORMES	CLINIDAE	Cristiceps	aurantiacus	Least Concern	Marine	[{'habitat': 'Marine Intertidal - Tidepools', 'code': '12.6', 'season': None, 'suitability': 'Suitable', 'majorimportance': None}, {'habitat': 'Marine Neritic - Subtidal Rock and Rocky Reefs', 'code': '9.2', 'season': None, 'suitability': 'Suitable', 'majorimportance': None}, {'habitat': 'Marine Neritic - Macroalgal/Kelp', 'code': '9.7', 'season': None, 'suitability': 'Suitable', 'majorimportance…	[]	There are no known threats.
178973	ACTINOPTERYGII	PERCIFORMES	TRIPTERYGIIDAE	Helcogramma	rharhabe	Least Concern	Marine	[{'habitat': 'Marine Intertidal - Rocky Shoreline', 'code': '12.1', 'season': None, 'suitability': 'Suitable', 'majorimportance': 'Yes'}, {'habitat': 'Marine Intertidal - Tidepools', 'code': '12.6', 'season': None, 'suitability': 'Suitable', 'majorimportance': 'Yes'}, {'habitat': 'Marine Neritic - Subtidal Rock and Rocky Reefs', 'code': '9.2', 'season': None, 'suitability': 'Suitable', 'majorimpo…	[]	There are no known threats to&#160;<em>Helcogramma rharhabe.</em>
178974	ACTINOPTERYGII	PERCIFORMES	CLINIDAE	Pavoclinus	profundus	Least Concern	Marine	[{'habitat': 'Marine Neritic - Subtidal Rock and Rocky Reefs', 'code': '9.2', 'season': None, 'suitability': 'Suitable', 'majorimportance': None}, {'habitat': 'Marine Neritic - Macroalgal/Kelp', 'code': '9.7', 'season': None, 'suitability': 'Suitable', 'majorimportance': None}]	[]	There are no known threats to this species.
178976	ACTINOPTERYGII	PERCIFORMES	CLINIDAE	Clinus	rotundifrons	Least Concern	Marine	[{'habitat': 'Marine Neritic - Macroalgal/Kelp', 'code': '9.7', 'season': None, 'suitability': 'Suitable', 'majorimportance': None}]	[]	There are no known threats to this species.
178977	ACTINOPTERYGII	PERCIFORMES	TRIPTERYGIIDAE	Enneapterygius	paucifasciatus	Least Concern	Marine	[{'habitat': 'Marine Neritic - Subtidal Rock and Rocky Reefs', 'code': '9.2', 'season': None, 'suitability': 'Suitable', 'majorimportance': 'Yes'}]	[]	<p><a name="OLE_LINK2">There are no known threats to&#160; <em>Enneapterygius paucifasciatus</em>.</a></p>
178978	ACTINOPTERYGII	PERCIFORMES	TRIPTERYGIIDAE	Enneanectes	altivelis	Least Concern	Marine	[{'habitat': 'Marine Neritic - Subtidal Rock and Rocky Reefs', 'code': '9.2', 'season': None, 'suitability': 'Suitable', 'majorimportance': 'Yes'}]	[]	<p><a name="OLE_LINK2">There are no known major threats to <span style="font-style: italic;">Enneanectes altivelis.&#160;</span>It&#160;has been identified as a prey item of the invasive Lionfish,&#160;<span style="font-style: italic;">Pterois volitans</span>&#160;(Valdez-Moreno et al. 2012).</a></p>
178979	ACTINOPTERYGII	PERCIFORMES	TRIPTERYGIIDAE	Helcogramma	rhinoceros	Least Concern	Marine	[{'habitat': 'Marine Intertidal - Rocky Shoreline', 'code': '12.1', 'season': None, 'suitability': 'Suitable', 'majorimportance': 'Yes'}, {'habitat': 'Marine Neritic - Subtidal Rock and Rocky Reefs', 'code': '9.2', 'season': None, 'suitability': 'Suitable', 'majorimportance': 'Yes'}]	[]	There are no known threats to&#160;<em>Helcogramma rhinoceros.</em>
178980	ACTINOPTERYGII	PERCIFORMES	CLINIDAE	Clinus	nematopterus	Least Concern	Marine	[{'habitat': 'Marine Neritic - Subtidal Rock and Rocky Reefs', 'code': '9.2', 'season': None, 'suitability': 'Suitable', 'majorimportance': None}]	[]	There are no known threats to this species.
178981	ACTINOPTERYGII	PERCIFORMES	TRIPTERYGIIDAE	Helcogramma	obtusirostris	Least Concern	Marine	[{'habitat': 'Marine Neritic - Subtidal Rock and Rocky Reefs', 'code': '9.2', 'season': None, 'suitability': 'Suitable', 'majorimportance': 'Yes'}]	[]	There are no known threats to&#160;<em>Helcogramma obtusirostris.</em>
178982	ACTINOPTERYGII	PERCIFORMES	TRIPTERYGIIDAE	Enneapterygius	genamaculatus	Least Concern	Marine	[{'habitat': 'Marine Intertidal - Rocky Shoreline', 'code': '12.1', 'season': None, 'suitability': 'Suitable', 'majorimportance': 'Yes'}, {'habitat': 'Marine Neritic - Subtidal Rock and Rocky Reefs', 'code': '9.2', 'season': None, 'suitability': 'Suitable', 'majorimportance': 'Yes'}]	[]	There are no known threats to <span style="font-style: italic;">Enneapterygius genamaculatus.</span>
178983	ACTINOPTERYGII	PERCIFORMES	TRIPTERYGIIDAE	Cremnochorites	capensis	Least Concern	Marine	[{'habitat': 'Marine Neritic - Subtidal Rock and Rocky Reefs', 'code': '9.2', 'season': None, 'suitability': 'Suitable', 'majorimportance': 'Yes'}]	[]	<p><a name="OLE_LINK2">There are no known threats to <span style="font-style: italic;">Cremnochorites capensis.</span><br/></a></p>
178984	ACTINOPTERYGII	PERCIFORMES	TRIPTERYGIIDAE	Helcogramma	larvata	Data Deficient	Marine	[{'habitat': 'Lagoon', 'code': '9.8.4', 'season': None, 'suitability': 'Suitable', 'majorimportance': 'Yes'}]	[{'code': '1.1', 'score': 'Unknown', 'severity': 'Unknown', 'timing': 'Ongoing', 'title': 'Housing & urban areas', 'invasive': None, 'scope': 'Unknown'}, {'code': '1.2', 'score': 'Unknown', 'severity': 'Unknown', 'timing': 'Ongoing', 'title': 'Commercial & industrial areas', 'invasive': None, 'scope': 'Unknown'}, {'code': '1.3', 'score': 'Unknown', 'severity': 'Unknown', 'timing': 'Ongoing', 'tit…	<em>Helcogramma larvata</em>&#160;occurs in the proximity of an area of high population density. Possible threats include coastal development and pollution.
178985	ACTINOPTERYGII	PERCIFORMES	TRIPTERYGIIDAE	Enneapterygius	pallidoserialis	Least Concern	Marine	[{'habitat': 'Marine Intertidal - Rocky Shoreline', 'code': '12.1', 'season': None, 'suitability': 'Suitable', 'majorimportance': 'Yes'}]	[]	<p><a name="OLE_LINK2">There are no known threats to&#160;<em>Enneapterygius pallidoserialis</em>.</a></p> <p>&#160;</p>
178986	ACTINOPTERYGII	PERCIFORMES	TRIPTERYGIIDAE	Enneapterygius	rufopileus	Least Concern	Marine	[{'habitat': 'Marine Intertidal - Rocky Shoreline', 'code': '12.1', 'season': None, 'suitability': 'Suitable', 'majorimportance': 'Yes'}, {'habitat': 'Marine Intertidal - Tidepools', 'code': '12.6', 'season': None, 'suitability': 'Suitable', 'majorimportance': 'Yes'}]	[]	There are no known threats to <em>Enneapterygius rufopileus.</em>
178987	ACTINOPTERYGII	PERCIFORMES	TRIPTERYGIIDAE	Enneapterygius	altipinnis	Least Concern	Marine	[{'habitat': 'Marine Neritic - Subtidal Rock and Rocky Reefs', 'code': '9.2', 'season': None, 'suitability': 'Suitable', 'majorimportance': 'Yes'}, {'habitat': 'Marine Neritic - Macroalgal/Kelp', 'code': '9.7', 'season': None, 'suitability': 'Suitable', 'majorimportance': 'Yes'}]	[]	<p><a name="OLE_LINK2">There are no known threats to <span style="font-style: italic;">Enneapterygius altipinnis.</span><br/></a></p>
178988	ACTINOPTERYGII	PERCIFORMES	TRIPTERYGIIDAE	Notoclinops	yaldwyni	Least Concern	Marine	[{'habitat': 'Marine Neritic - Subtidal Rock and Rocky Reefs', 'code': '9.2', 'season': None, 'suitability': 'Suitable', 'majorimportance': 'Yes'}]	[]	There are no known threats to <em>Notoclinops yaldwyni.</em>
178989	ACTINOPTERYGII	PERCIFORMES	TRIPTERYGIIDAE	Helcogramma	hudsoni	Least Concern	Marine	[{'habitat': 'Marine Intertidal - Rocky Shoreline', 'code': '12.1', 'season': None, 'suitability': 'Suitable', 'majorimportance': 'Yes'}, {'habitat': 'Marine Neritic - Subtidal Rock and Rocky Reefs', 'code': '9.2', 'season': None, 'suitability': 'Suitable', 'majorimportance': 'Yes'}]	[]	<p><a name="OLE_LINK2">There are no known threats to&#160;</a><em>Helcogramma hudsoni.</em></p>
178990	ACTINOPTERYGII	PERCIFORMES	TRIPTERYGIIDAE	Forsterygion	flavonigrum	Least Concern	Marine	[{'habitat': 'Marine Neritic - Subtidal Rock and Rocky Reefs', 'code': '9.2', 'season': None, 'suitability': 'Suitable', 'majorimportance': 'Yes'}, {'habitat': 'Marine Neritic - Subtidal Sandy-Mud', 'code': '9.5', 'season': None, 'suitability': 'Suitable', 'majorimportance': 'Yes'}, {'habitat': 'Marine Neritic - Subtidal Muddy', 'code': '9.6', 'season': None, 'suitability': 'Suitable', 'majorimpo…	[]	There are no known threats to <em>Forsterygion flavonigrum.</em>
178991	ACTINOPTERYGII	PERCIFORMES	TRIPTERYGIIDAE	Enneapterygius	williamsi	Least Concern	Marine	[{'habitat': 'Marine Intertidal - Rocky Shoreline', 'code': '12.1', 'season': None, 'suitability': 'Suitable', 'majorimportance': 'Yes'}, {'habitat': 'Marine Neritic - Subtidal Rock and Rocky Reefs', 'code': '9.2', 'season': None, 'suitability': 'Suitable', 'majorimportance': 'Yes'}]	[]	<p><a name="OLE_LINK2">There are no known threats to&#160;<em>Enneapterygius williamsi</em>.</a></p>
178992	ACTINOPTERYGII	PERCIFORMES	TRIPTERYGIIDAE	Norfolkia	brachylepis	Least Concern	Marine	[{'habitat': 'Marine Neritic - Subtidal Rock and Rocky Reefs', 'code': '9.2', 'season': None, 'suitability': 'Suitable', 'majorimportance': 'Yes'}]	[]	There are no known threats to&#160;<em>Norfolkia brachylepis.</em>
178993	ACTINOPTERYGII	PERCIFORMES	TRIPTERYGIIDAE	Cryptichthys	jojettae	Least Concern	Marine	[{'habitat': 'Marine Intertidal - Rocky Shoreline', 'code': '12.1', 'season': None, 'suitability': 'Suitable', 'majorimportance': 'Yes'}, {'habitat': 'Marine Neritic - Subtidal Rock and Rocky Reefs', 'code': '9.2', 'season': None, 'suitability': 'Suitable', 'majorimportance': 'Yes'}]	[]	There are no known threats to <span style="font-style: italic;">Cryptichthys jojettae.</span>
178994	ACTINOPTERYGII	PERCIFORMES	CLINIDAE	Fucomimus	mus	Least Concern	Marine	[{'habitat': 'Marine Intertidal - Tidepools', 'code': '12.6', 'season': None, 'suitability': 'Suitable', 'majorimportance': None}]	[]	There are no known threats to this species.
178995	ACTINOPTERYGII	PERCIFORMES	TRIPTERYGIIDAE	Notoclinops	caerulepunctus	Least Concern	Marine	[{'habitat': 'Marine Neritic - Subtidal Rock and Rocky Reefs', 'code': '9.2', 'season': None, 'suitability': 'Suitable', 'majorimportance': 'Yes'}]	[]	There are no known threats to&#160;<em>Notoclinops caerulepunctus.</em>
178996	ACTINOPTERYGII	PERCIFORMES	TRIPTERYGIIDAE	Helcogrammoides	cunninghami	Least Concern	Marine	[{'habitat': 'Marine Intertidal - Rocky Shoreline', 'code': '12.1', 'season': None, 'suitability': 'Suitable', 'majorimportance': 'Yes'}, {'habitat': 'Marine Neritic - Subtidal Rock and Rocky Reefs', 'code': '9.2', 'season': None, 'suitability': 'Suitable', 'majorimportance': 'Yes'}]	[]	There are no known threats to&#160;<em>Helcogrammoides cunninghami</em>.
178997	ACTINOPTERYGII	PERCIFORMES	CLINIDAE	Clinus	cottoides	Least Concern	Marine	[{'habitat': 'Marine Intertidal - Tidepools', 'code': '12.6', 'season': None, 'suitability': 'Suitable', 'majorimportance': None}, {'habitat': 'Marine Neritic - Macroalgal/Kelp', 'code': '9.7', 'season': None, 'suitability': 'Suitable', 'majorimportance': None}]	[]	There are no known threats to this species.
178998	ACTINOPTERYGII	PERCIFORMES	TRIPTERYGIIDAE	Ruanoho	decemdigitatus	Least Concern	Marine	[{'habitat': 'Marine Neritic - Subtidal Rock and Rocky Reefs', 'code': '9.2', 'season': None, 'suitability': 'Suitable', 'majorimportance': 'Yes'}, {'habitat': 'Marine Neritic - Subtidal Loose Rock/pebble/gravel', 'code': '9.3', 'season': None, 'suitability': 'Suitable', 'majorimportance': 'Yes'}]	[]	There are no known threats to&#160;<em>Ruanoho decemdigitatus.</em>
178999	ACTINOPTERYGII	PERCIFORMES	CLINIDAE	Clinus	latipennis	Endangered	Marine	[{'habitat': 'Marine Neritic - Subtidal Sandy', 'code': '9.4', 'season': None, 'suitability': 'Suitable', 'majorimportance': None}]	[{'code': '1.2', 'score': 'Unknown', 'severity': 'Unknown', 'timing': 'Ongoing', 'title': 'Commercial & industrial areas', 'invasive': None, 'scope': 'Majority (50-90%)'}, {'code': '1.3', 'score': 'Unknown', 'severity': 'Unknown', 'timing': 'Ongoing', 'title': 'Tourism & recreation areas', 'invasive': None, 'scope': 'Majority (50-90%)'}]	In approximately three-quarters of this species' range, such as Langebaan and south to Cape Town, there has been a lot of coastal development over the past 30 years, even more so in the past 15 years. This is impacting habitat quality for this fish. Members of the family are viviparous, and therefore reproduce at a local, site-associated level, and have low dispersive ability, characteristics tha…
179000	ACTINOPTERYGII	PERCIFORMES	TRIPTERYGIIDAE	Helcogramma	novaecaledoniae	Least Concern	Marine	[{'habitat': 'Marine Intertidal - Rocky Shoreline', 'code': '12.1', 'season': None, 'suitability': 'Suitable', 'majorimportance': 'Yes'}, {'habitat': 'Marine Neritic - Subtidal Rock and Rocky Reefs', 'code': '9.2', 'season': None, 'suitability': 'Suitable', 'majorimportance': 'Yes'}]	[]	There are no known threats to <em>Helcogramma novaecaledoniae.</em>
179001	ACTINOPTERYGII	PERCIFORMES	TRIPTERYGIIDAE	Enneapterygius	nanus	Least Concern	Marine	[{'habitat': 'Marine Intertidal - Rocky Shoreline', 'code': '12.1', 'season': None, 'suitability': 'Suitable', 'majorimportance': 'Yes'}, {'habitat': 'Marine Intertidal - Tidepools', 'code': '12.6', 'season': None, 'suitability': 'Suitable', 'majorimportance': 'Yes'}, {'habitat': 'Marine Neritic - Subtidal Loose Rock/pebble/gravel', 'code': '9.3', 'season': None, 'suitability': 'Suitable', 'major…	[]	<p><a name="OLE_LINK2">There are no known threats to&#160;<em>Enneapterygius nanus</em>.</a></p>
179002	ACTINOPTERYGII	PERCIFORMES	TRIPTERYGIIDAE	Enneapterygius	fasciatus	Least Concern	Marine	[]	[]	There are no known threats to <span style="font-style: italic;">Enneapterygius fasciatus.</span>
179003	ACTINOPTERYGII	PERCIFORMES	CLINIDAE	Cancelloxus	burrelli	Least Concern	Marine	[{'habitat': 'Marine Neritic - Subtidal Sandy', 'code': '9.4', 'season': None, 'suitability': 'Suitable', 'majorimportance': None}]	[]	There are no known threats to this species.
179004	ACTINOPTERYGII	PERCIFORMES	CLINIDAE	Xenopoclinus	kochi	Least Concern	Marine	[{'habitat': 'Marine Intertidal - Tidepools', 'code': '12.6', 'season': None, 'suitability': 'Suitable', 'majorimportance': None}, {'habitat': 'Marine Neritic - Macroalgal/Kelp', 'code': '9.7', 'season': None, 'suitability': 'Suitable', 'majorimportance': None}]	[]	<p>There are no known threats to this species.</p>
179005	ACTINOPTERYGII	PERCIFORMES	CLINIDAE	Ericentrus	rubrus	Least Concern	Marine	[{'habitat': 'Marine Intertidal - Tidepools', 'code': '12.6', 'season': None, 'suitability': 'Suitable', 'majorimportance': None}, {'habitat': 'Marine Neritic - Subtidal Rock and Rocky Reefs', 'code': '9.2', 'season': None, 'suitability': 'Suitable', 'majorimportance': None}, {'habitat': 'Marine Neritic - Macroalgal/Kelp', 'code': '9.7', 'season': None, 'suitability': 'Suitable', 'majorimportance…	[]	There are no threats to this species.
179006	ACTINOPTERYGII	PERCIFORMES	TRIPTERYGIIDAE	Enneapterygius	atrogulare	Least Concern	Marine	[{'habitat': 'Marine Intertidal - Rocky Shoreline', 'code': '12.1', 'season': None, 'suitability': 'Suitable', 'majorimportance': 'Yes'}, {'habitat': 'Marine Intertidal - Tidepools', 'code': '12.6', 'season': None, 'suitability': 'Unknown', 'majorimportance': None}]	[]	<p><a name="OLE_LINK2">There are no known threats to <span style="font-style: italic;">Enneapterygius atrogulare.</span><br/></a></p>
179007	ACTINOPTERYGII	PERCIFORMES	CLINIDAE	Heteroclinus	nasutus	Least Concern	Marine	[{'habitat': 'Marine Intertidal - Tidepools', 'code': '12.6', 'season': None, 'suitability': 'Suitable', 'majorimportance': None}, {'habitat': 'Marine Neritic - Macroalgal/Kelp', 'code': '9.7', 'season': None, 'suitability': 'Suitable', 'majorimportance': None}]	[]	<p>There are no known threats to this species.</p>
179008	ACTINOPTERYGII	PERCIFORMES	CLINIDAE	Ophiclinops	hutchinsi	Least Concern	Marine	[{'habitat': 'Marine Intertidal - Rocky Shoreline', 'code': '12.1', 'season': None, 'suitability': 'Suitable', 'majorimportance': None}, {'habitat': 'Marine Neritic - Subtidal Rock and Rocky Reefs', 'code': '9.2', 'season': None, 'suitability': 'Suitable', 'majorimportance': None}, {'habitat': 'Marine Neritic - Macroalgal/Kelp', 'code': '9.7', 'season': None, 'suitability': 'Suitable', 'majorimpo…	[]	There are no known threats to this species. <span style="font-style: italic;">Ophiclinops hutchinsi</span> is site-associated in shallow coastal habitats and processes which damage such habitats may adversely affect populations of Clinid species. Members of the family are viviparous, and therefore reproduce at a local, site-associated level, and have low dispersive ability, characteristics that c…
179009	ACTINOPTERYGII	PERCIFORMES	CLINIDAE	Heteroclinus	antinectes	Least Concern	Marine	[{'habitat': 'Marine Neritic - Subtidal Rock and Rocky Reefs', 'code': '9.2', 'season': None, 'suitability': 'Unknown', 'majorimportance': None}, {'habitat': 'Marine Neritic - Macroalgal/Kelp', 'code': '9.7', 'season': None, 'suitability': 'Unknown', 'majorimportance': None}, {'habitat': 'Marine Neritic - Seagrass (Submerged)', 'code': '9.9', 'season': None, 'suitability': 'Unknown', 'majorimport…	[]	There are no known threats to this species.
179010	ACTINOPTERYGII	PERCIFORMES	CLINIDAE	Clinoporus	biporosus	Least Concern	Marine	[{'habitat': 'Marine Neritic - Subtidal Loose Rock/pebble/gravel', 'code': '9.3', 'season': None, 'suitability': 'Suitable', 'majorimportance': None}, {'habitat': 'Marine Neritic - Macroalgal/Kelp', 'code': '9.7', 'season': None, 'suitability': 'Suitable', 'majorimportance': None}]	[]	There are no known threats to this species.
179012	ACTINOPTERYGII	PERCIFORMES	TRIPTERYGIIDAE	Helcogramma	capidata	Least Concern	Marine	[{'habitat': 'Marine Intertidal - Rocky Shoreline', 'code': '12.1', 'season': None, 'suitability': 'Suitable', 'majorimportance': 'Yes'}, {'habitat': 'Marine Neritic - Subtidal Rock and Rocky Reefs', 'code': '9.2', 'season': None, 'suitability': 'Suitable', 'majorimportance': 'Yes'}]	[]	<p><a name="OLE_LINK2">There are no known threats to <em>Helcogramma capidata</em>.</a></p>
179013	ACTINOPTERYGII	PERCIFORMES	TRIPTERYGIIDAE	Enneapterygius	elaine	Least Concern	Marine	[{'habitat': 'Marine Neritic - Subtidal Sandy', 'code': '9.4', 'season': None, 'suitability': 'Suitable', 'majorimportance': 'Yes'}]	[]	There are currently no known threats to <span style="font-style: italic;">Enneapterygius elaine.</span>
179014	ACTINOPTERYGII	PERCIFORMES	TRIPTERYGIIDAE	Forsterygion	varium	Least Concern	Marine	[{'habitat': 'Marine Neritic - Subtidal Rock and Rocky Reefs', 'code': '9.2', 'season': None, 'suitability': 'Suitable', 'majorimportance': 'Yes'}]	[]	There are no known threats to&#160;<em>Forsterygion varium.</em>
179015	ACTINOPTERYGII	PERCIFORMES	CLINIDAE	Heterostichus	rostratus	Least Concern	Marine	[{'habitat': 'Marine Neritic - Subtidal Rock and Rocky Reefs', 'code': '9.2', 'season': None, 'suitability': 'Suitable', 'majorimportance': None}, {'habitat': 'Marine Neritic - Macroalgal/Kelp', 'code': '9.7', 'season': None, 'suitability': 'Suitable', 'majorimportance': None}]	[]	There are no major threats known for this species.
179016	ACTINOPTERYGII	PERCIFORMES	CLINIDAE	Pavoclinus	graminis	Least Concern	Marine	[{'habitat': 'Marine Intertidal - Tidepools', 'code': '12.6', 'season': None, 'suitability': 'Suitable', 'majorimportance': None}, {'habitat': 'Marine Neritic - Macroalgal/Kelp', 'code': '9.7', 'season': None, 'suitability': 'Suitable', 'majorimportance': None}]	[]	<p>There are no known threats to this species.</p>
[truncated: 46,046 more rows]

## Sheet: Table S2
Table S2. The 1,000 vertebrate species and respective data randomly selected from the 46,557 entries in the IUCN Red List database. These 1000 species were used to (1) identify the mechanisms by which human carnivory threatens the world's vertebrates, (2) quantify the proportion of species affected by each one of these mechanisms, and (3) quantify the proportion of species affected by each aspect…
[truncated: 1,002 more rows]

[truncated: 5 more sheets: Table S3, Table S4, Table S5, Table S6, Table S7]
